# Supplementary material for: Real-Time Parallel Processing of Grammatical Structure in the Fronto-Striatal System: A Recurrent Network Simulation Study Using Reservoir Computing
Source: PubMed Central journal article supplement (PMC3562282; doi:10.1371/journal.pone.0052946), 2013-02-01

Sentence 15: 'the N V the N .'

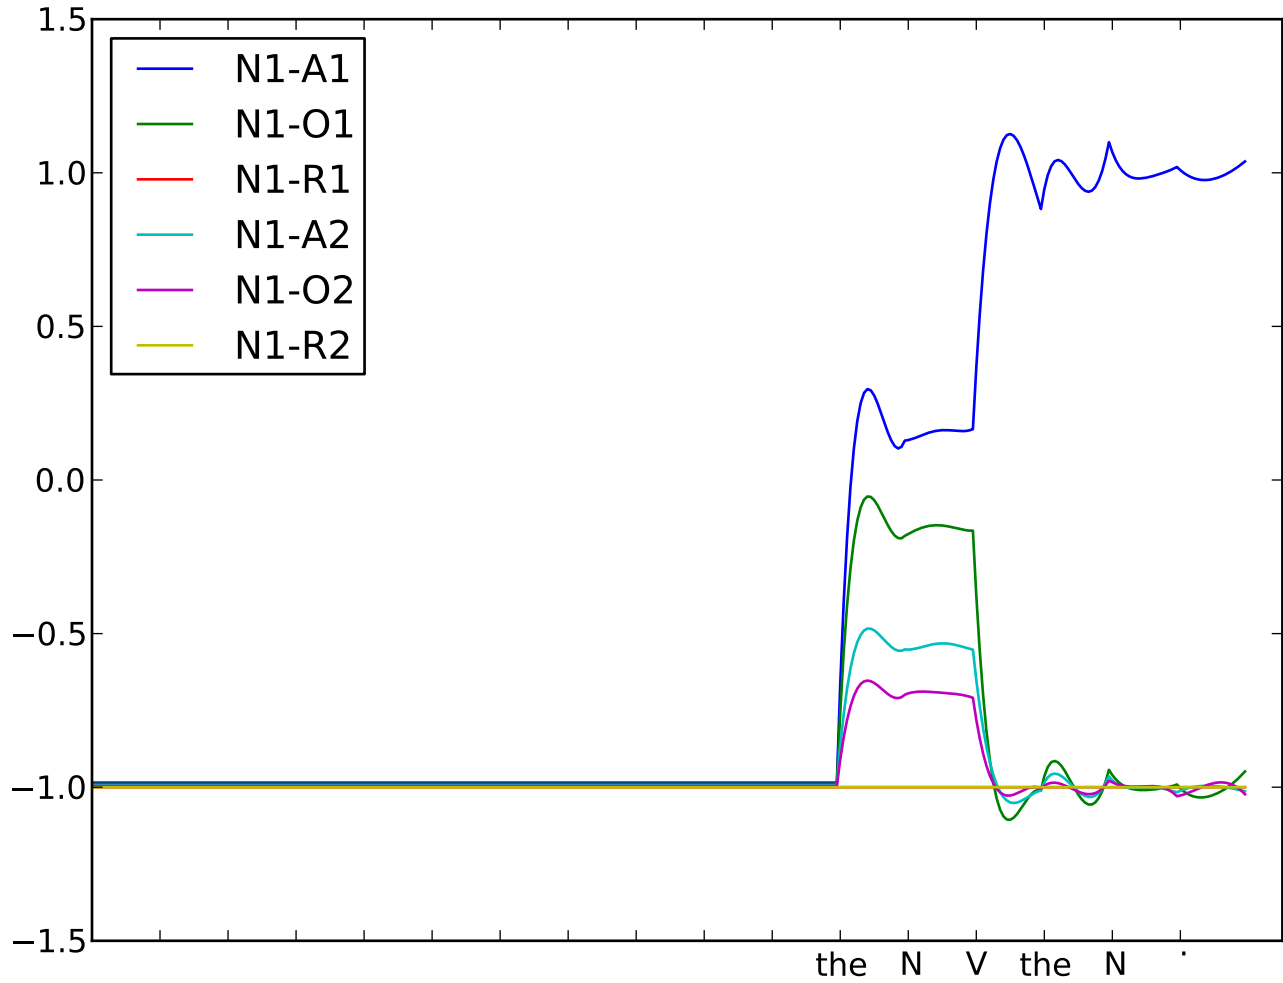

Sentence 15: 'the N V the N .'

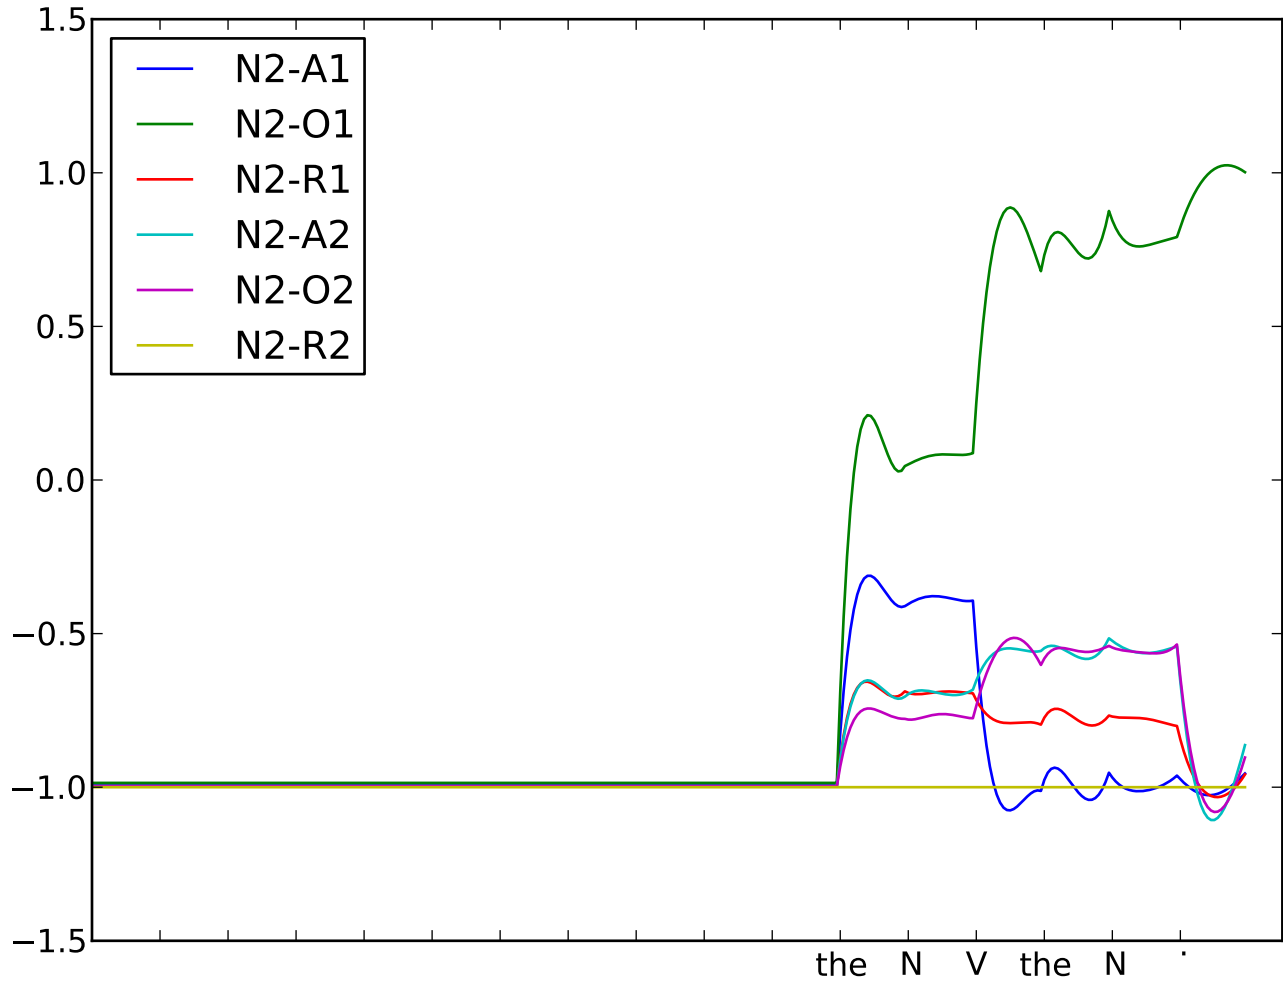

Sentence 15: 'the N V the N .'

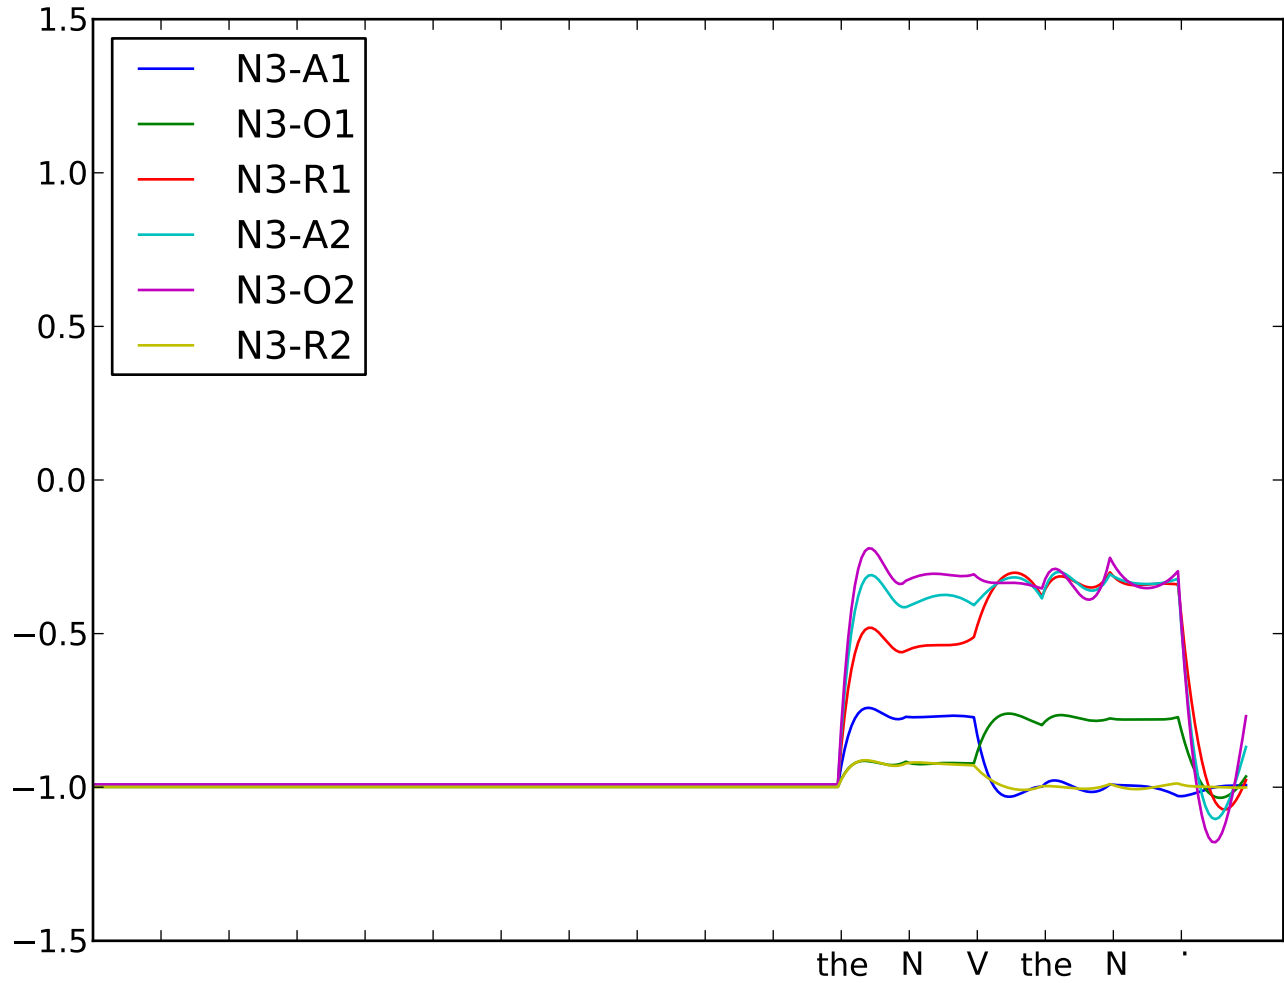



Sentence 16: 'the N was V by the N .'

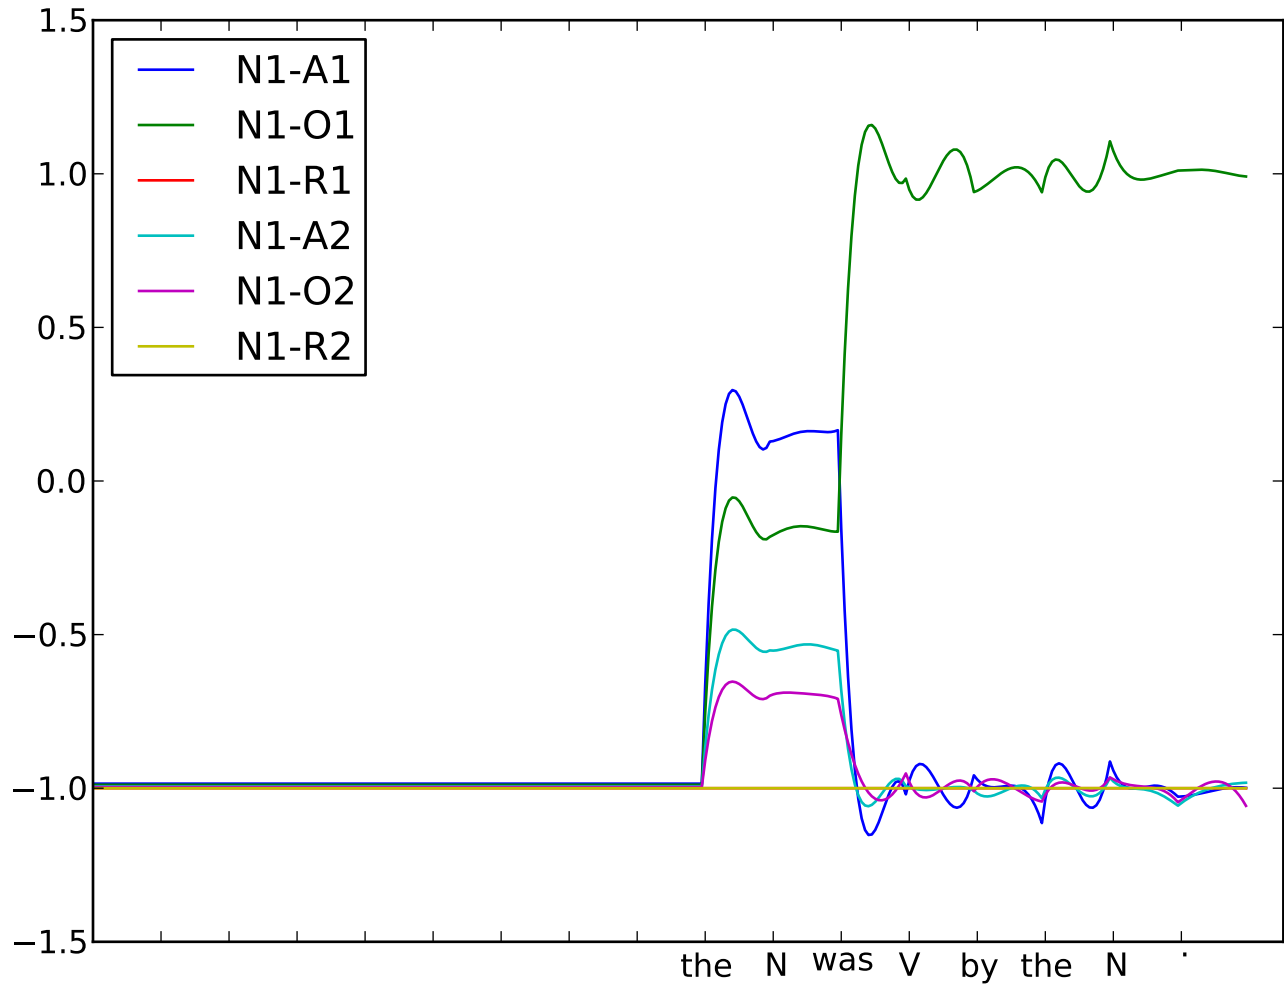

Sentence 16: 'the N was V by the N .'

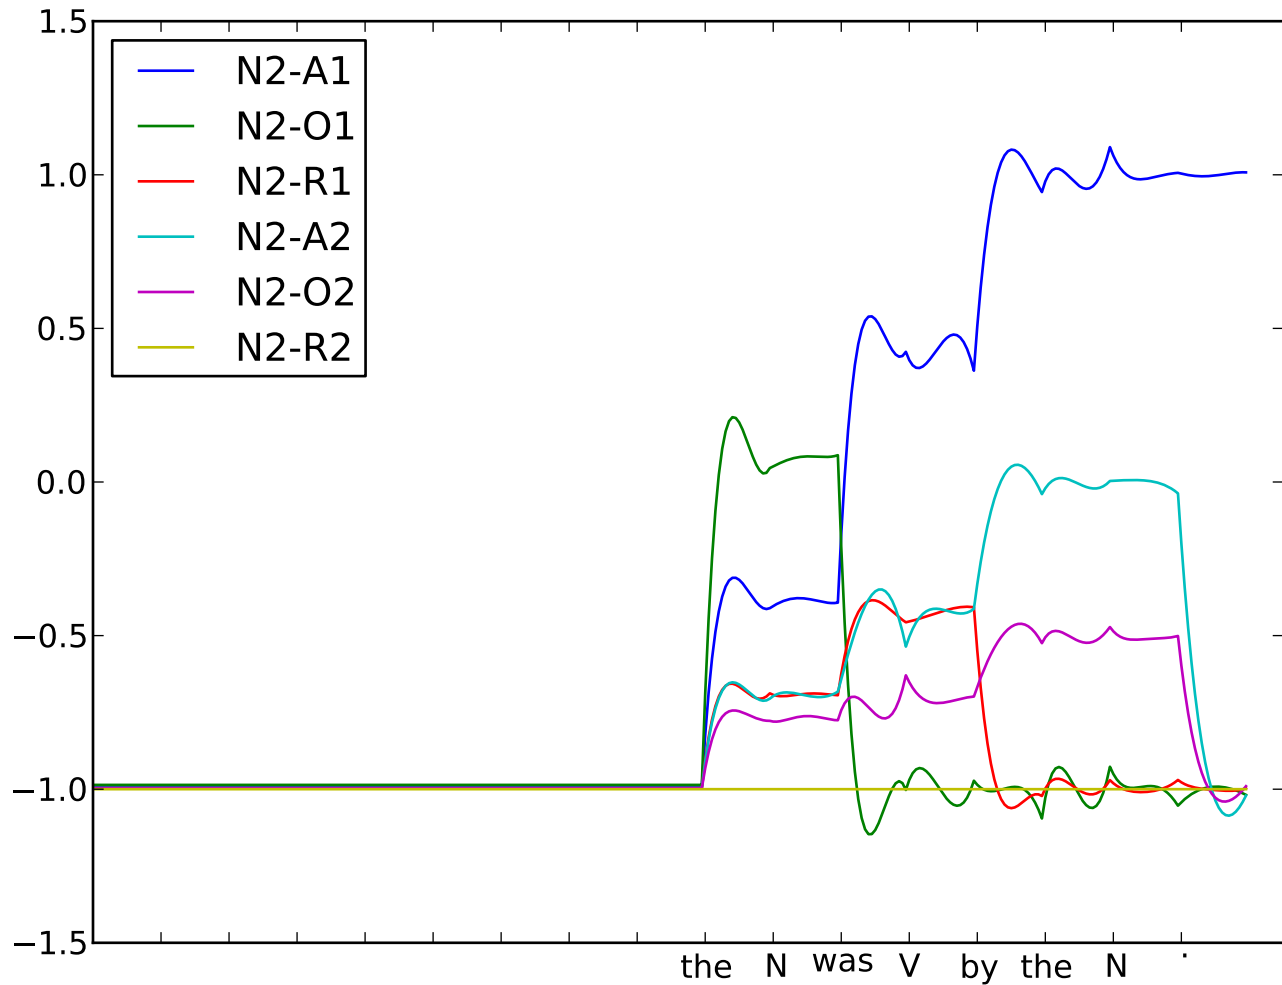

Sentence 16: 'the N was V by the N .'

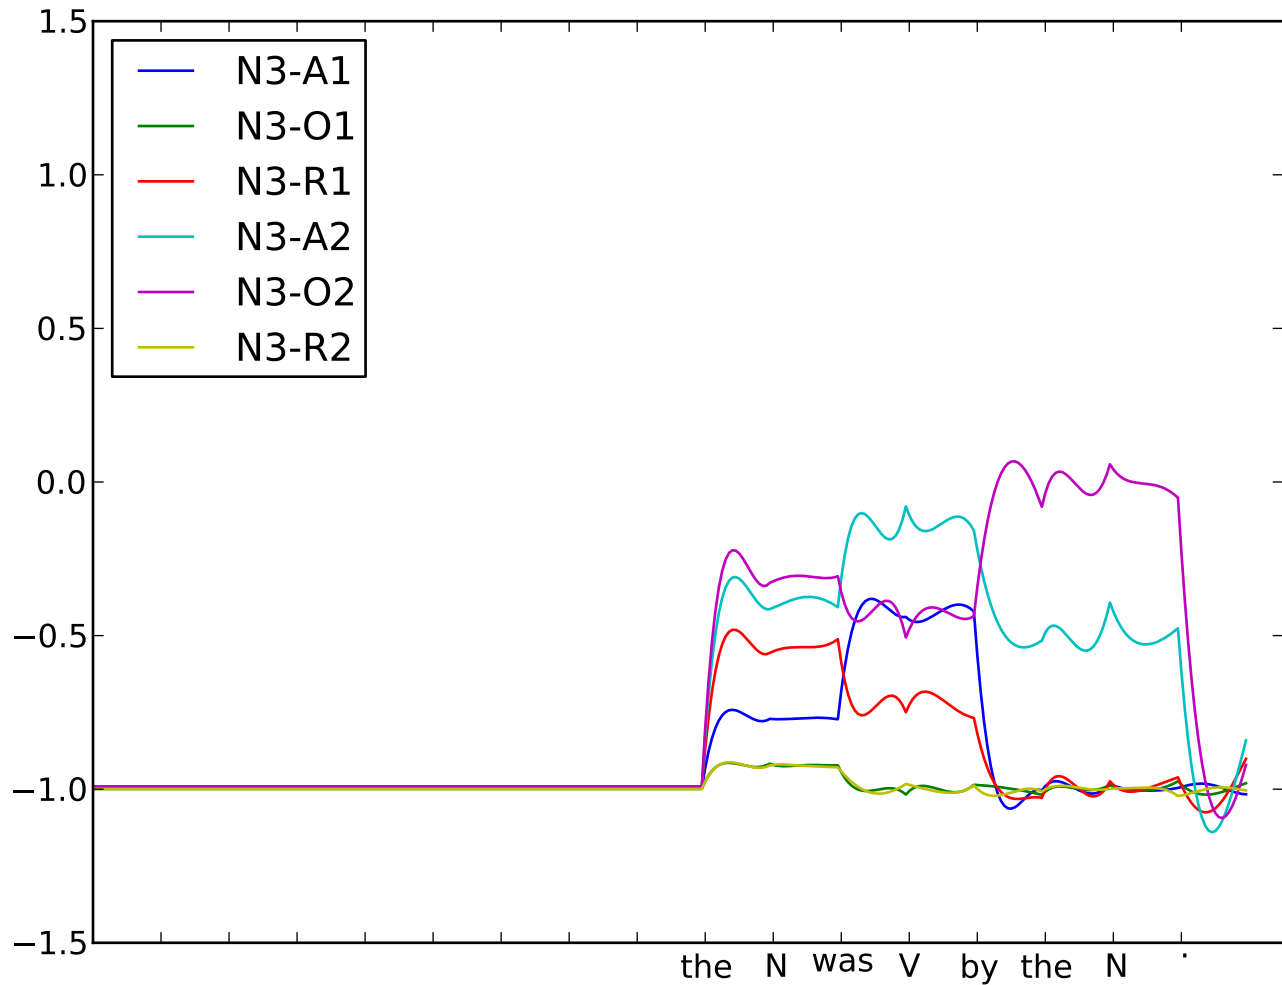

Sentence 16: 'the N was V by the N .'

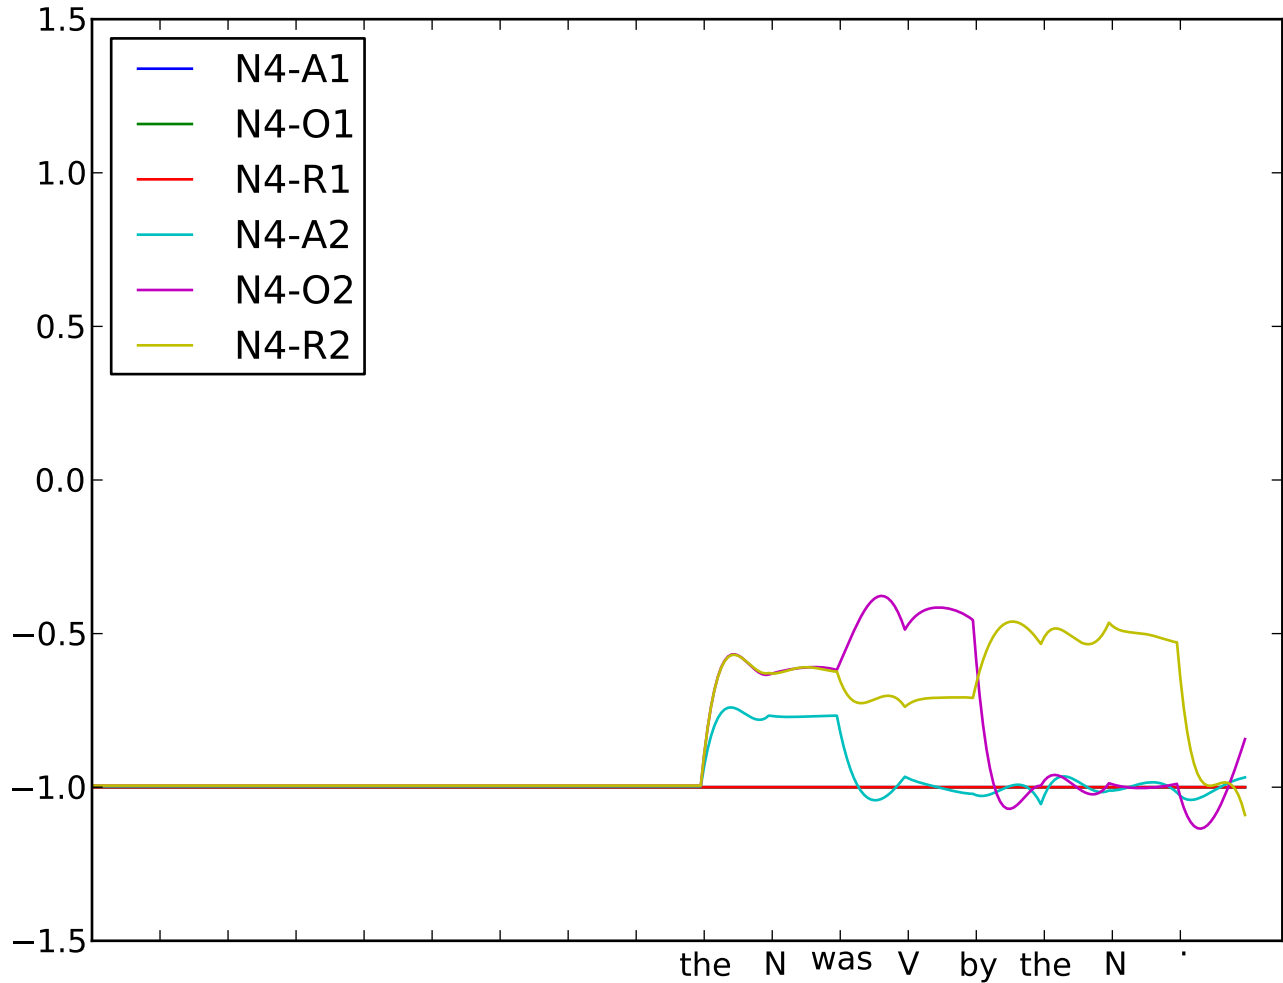



Sentence 17: 'the N V the N to the N .'

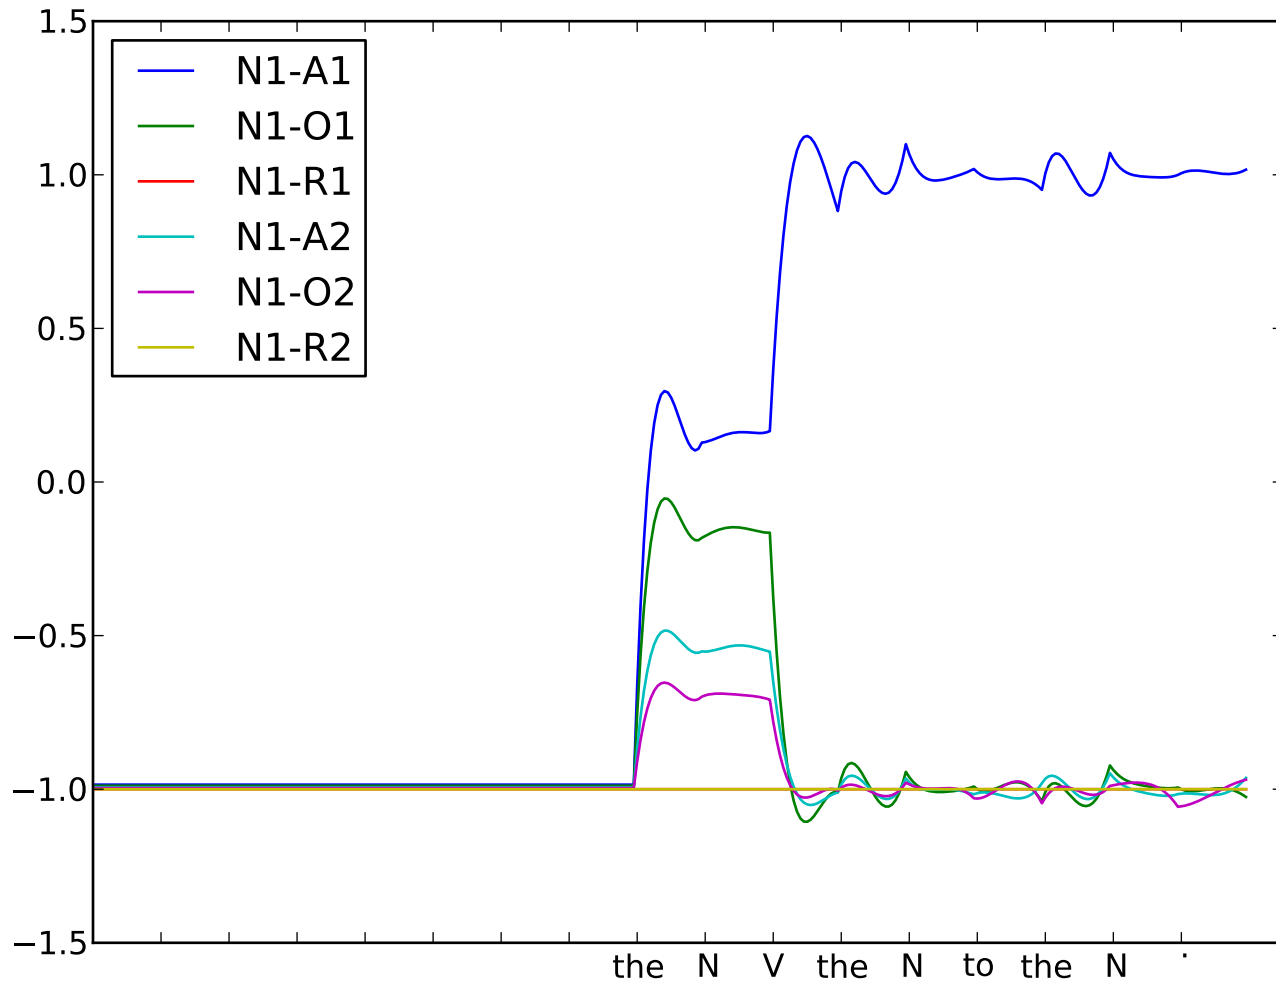

Sentence 17: 'the N V the N to the N .'

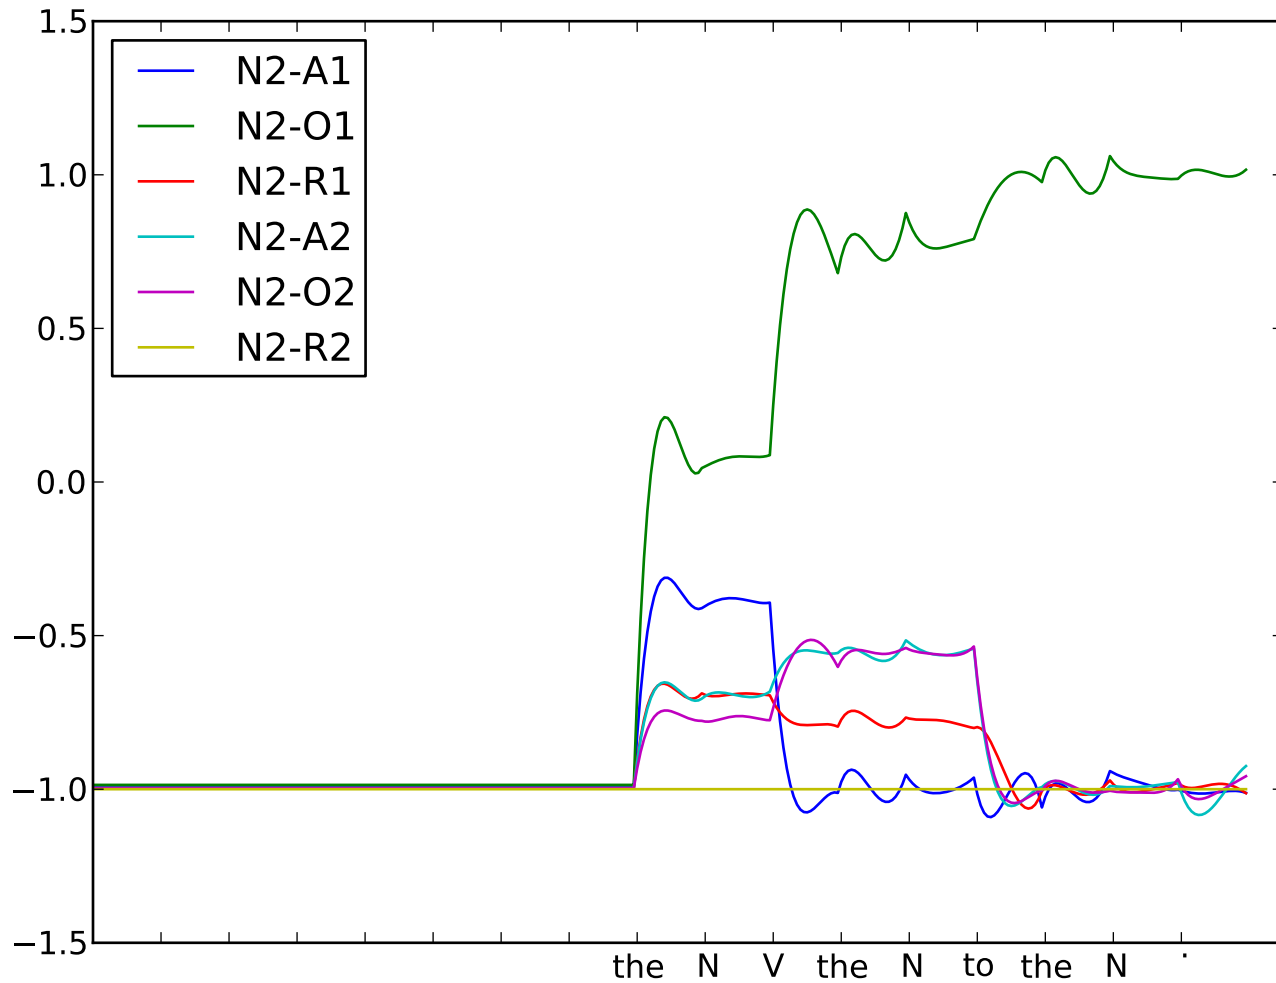

Sentence 17: 'the N V the N to the N .'

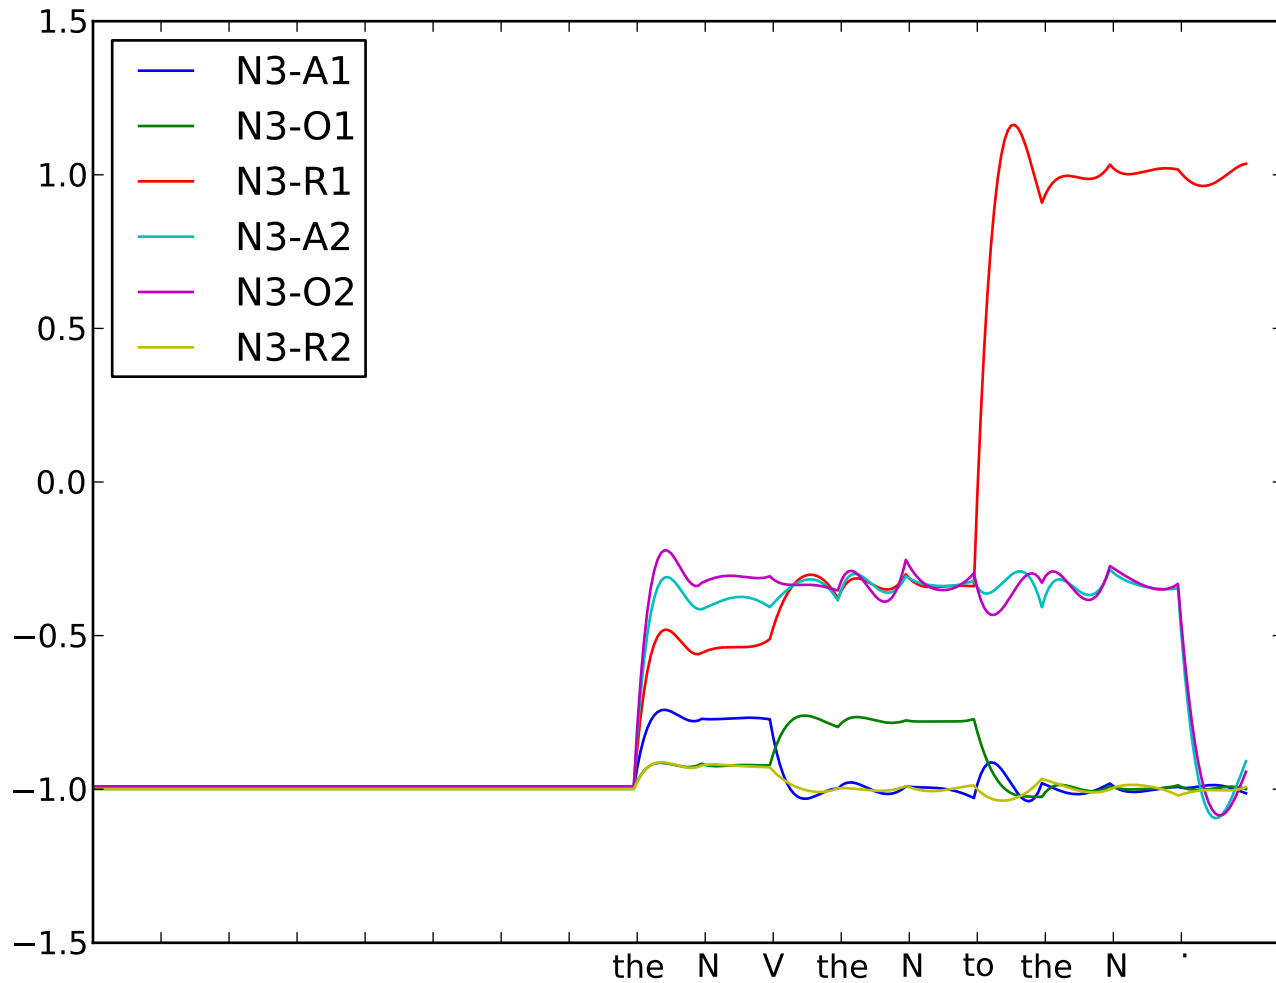

Sentence 17: 'the N V the N to the N .'

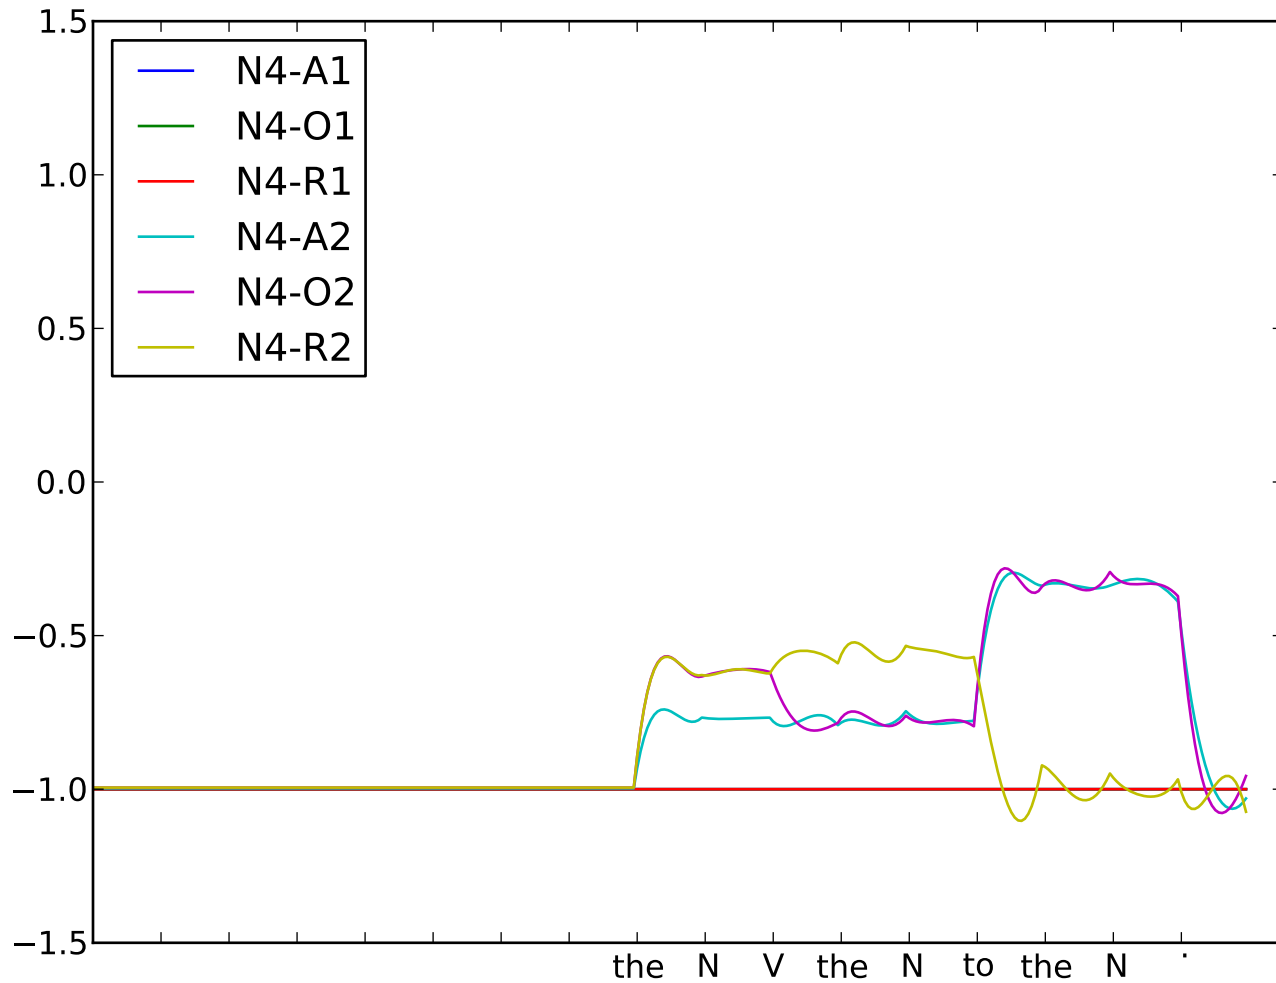

Sentence 18: 'the N was V to the N by the N .'

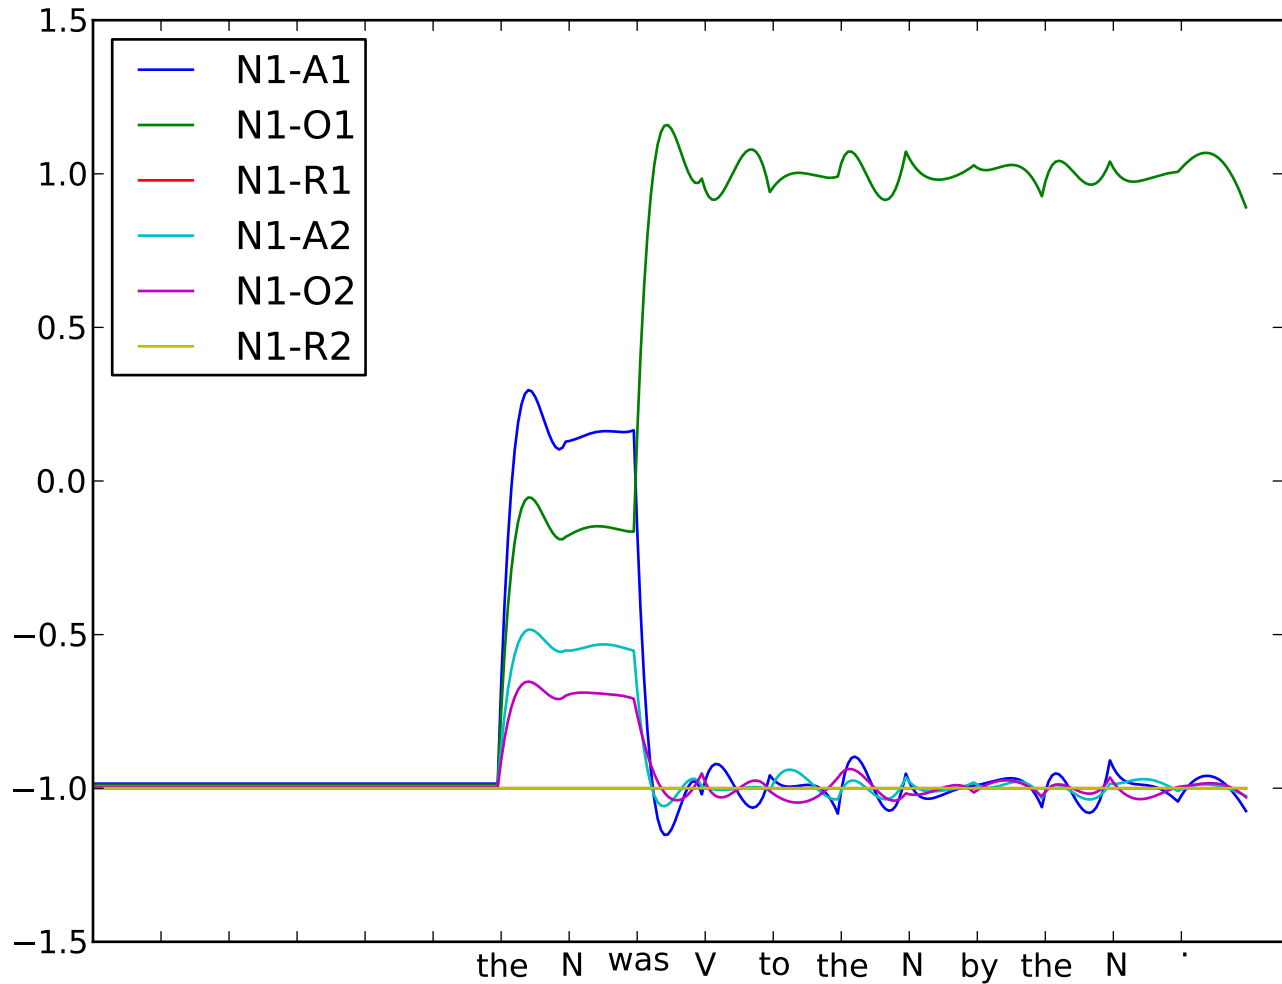

Sentence 18: 'the N was V to the N by the N .'

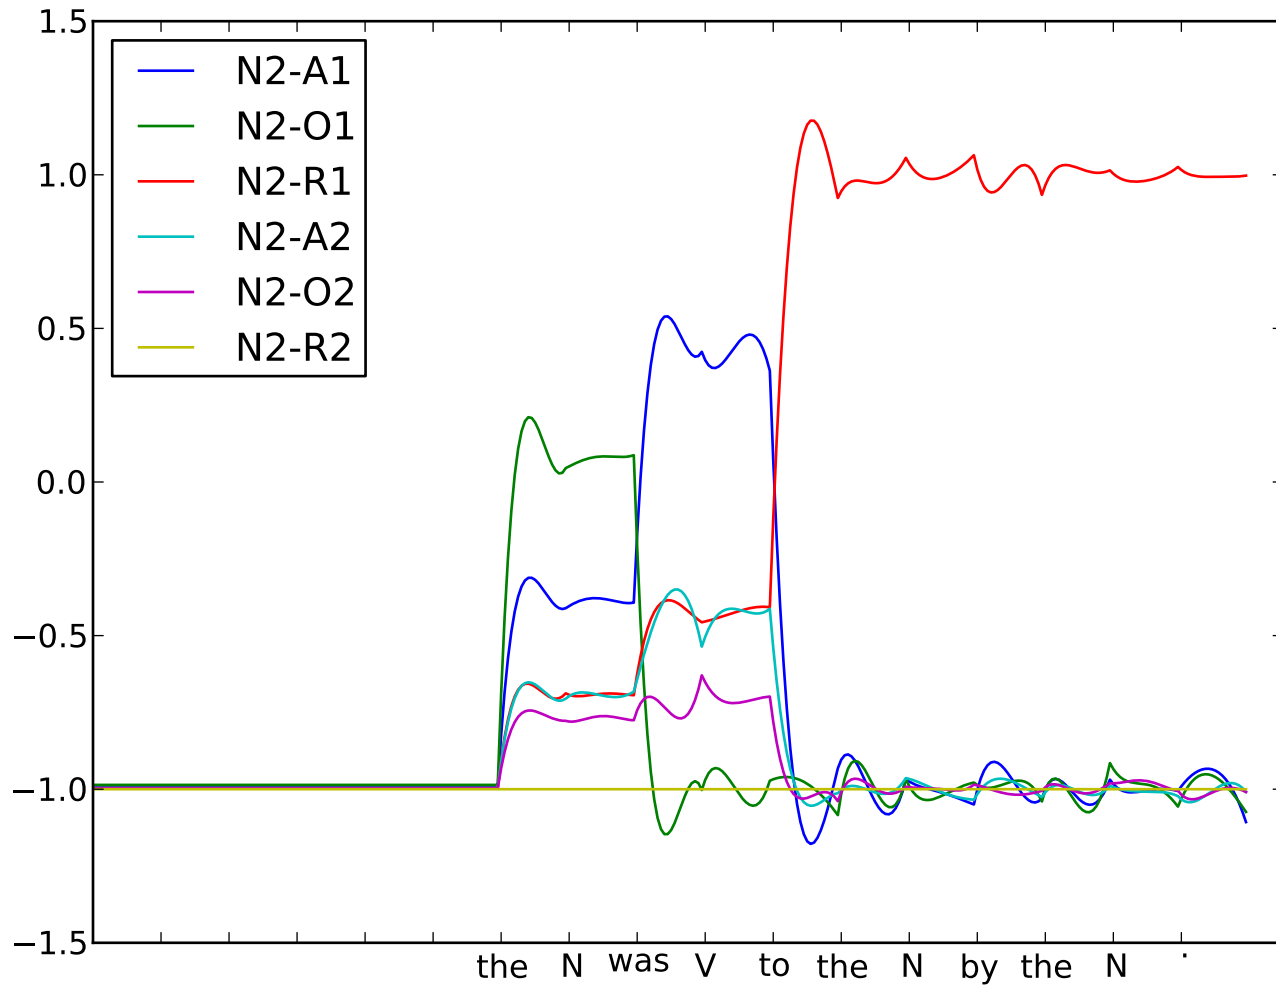

Sentence 18: 'the N was V to the N by the N .'

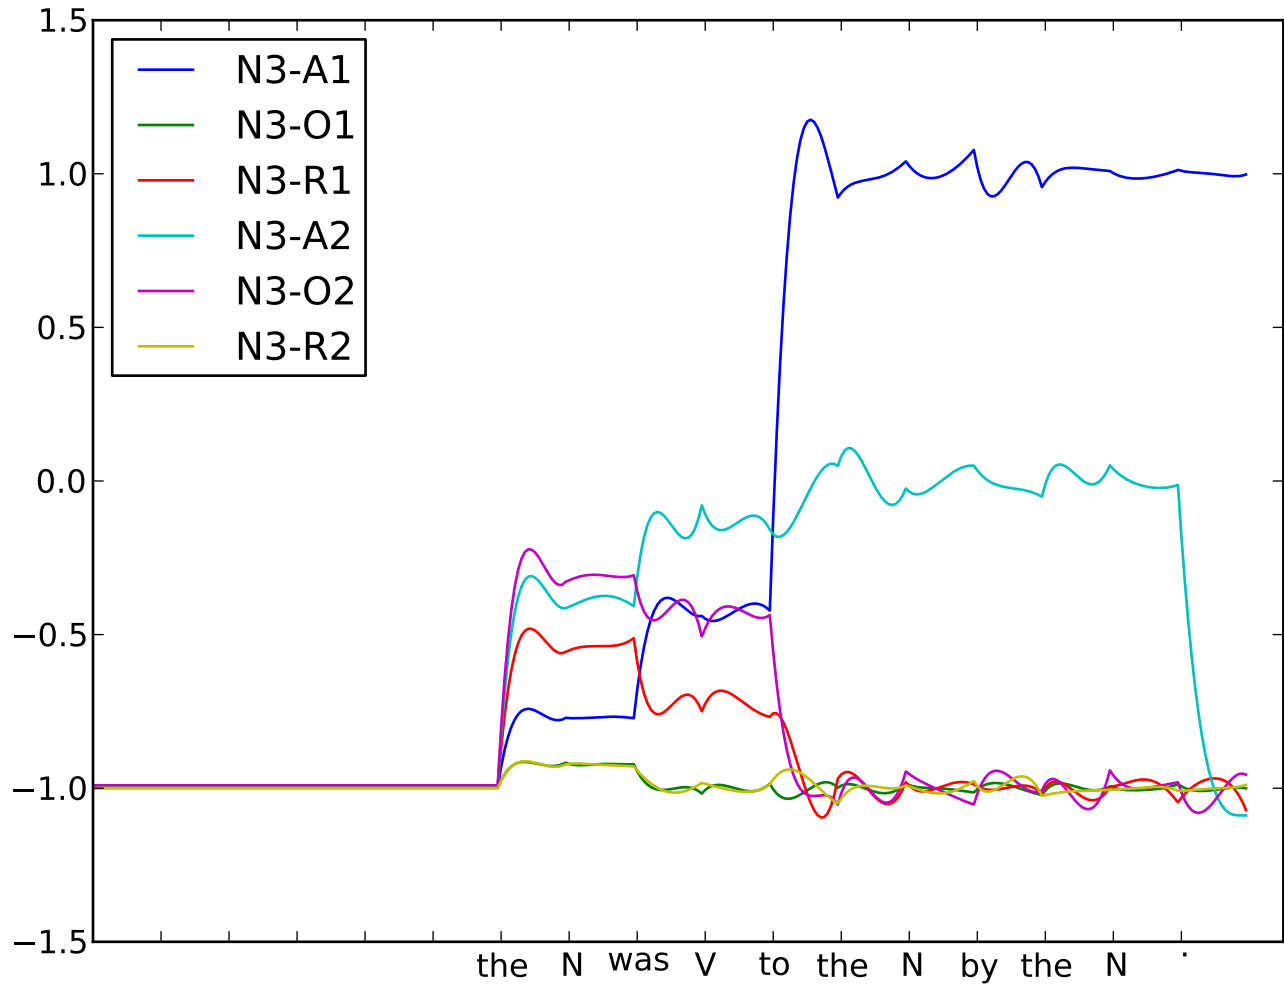

Sentence 18: 'the N was V to the N by the N .'

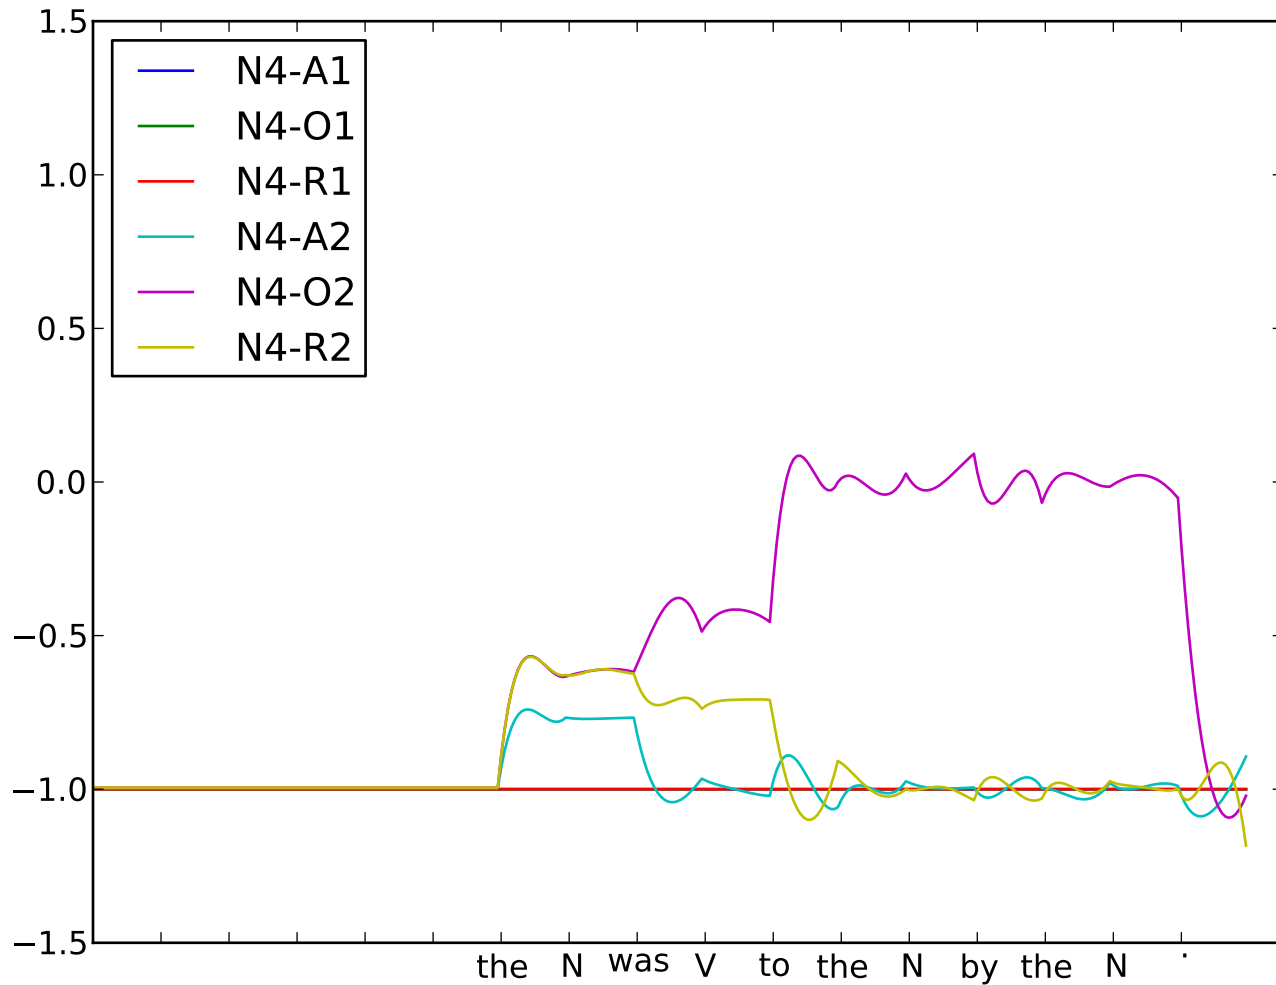



Sentence 19: 'the N V the N the N .'

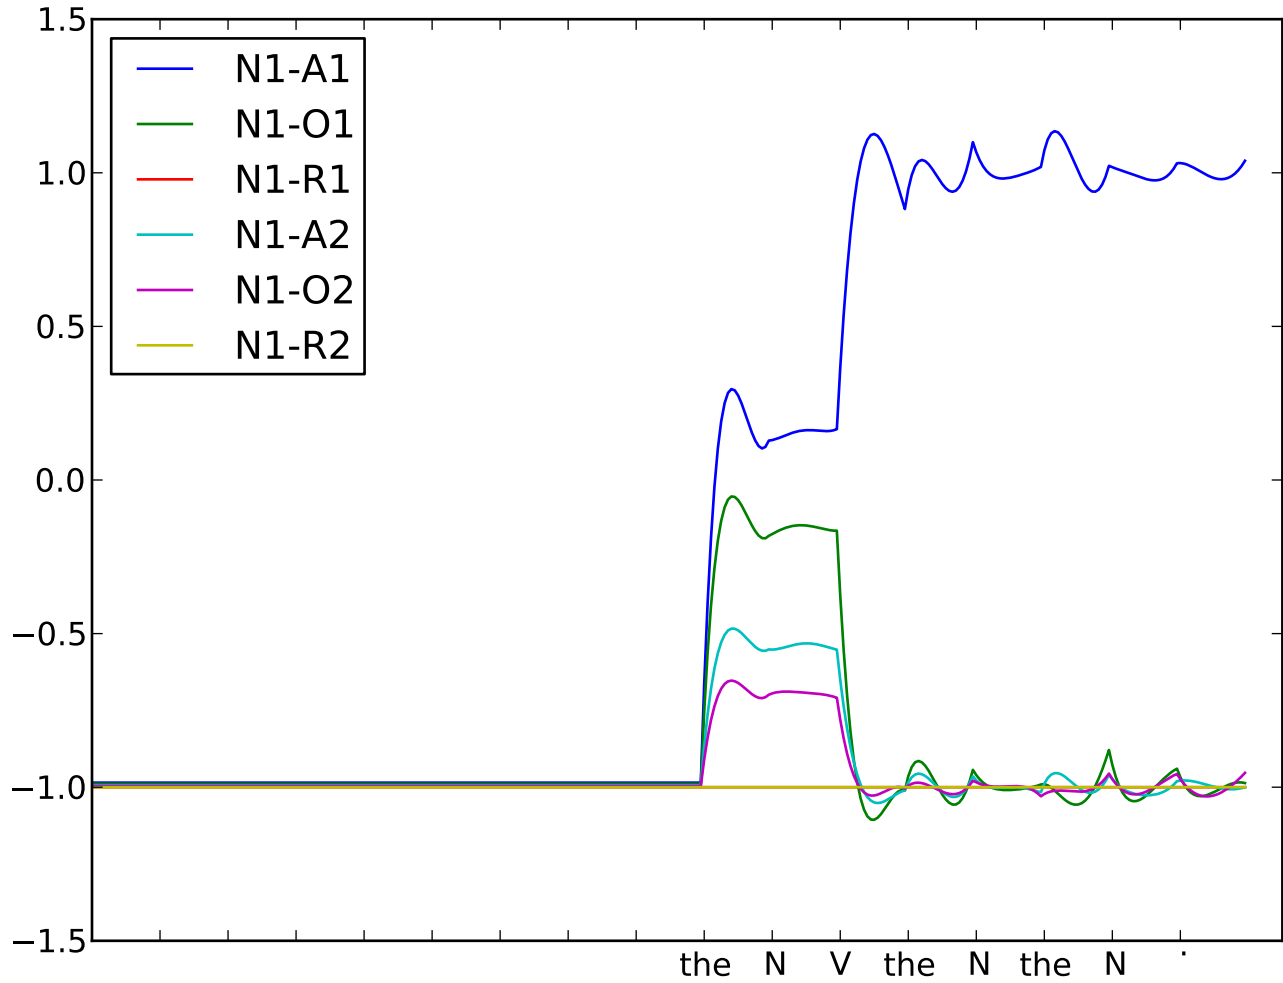



Sentence 19: 'the N V the N the N .'

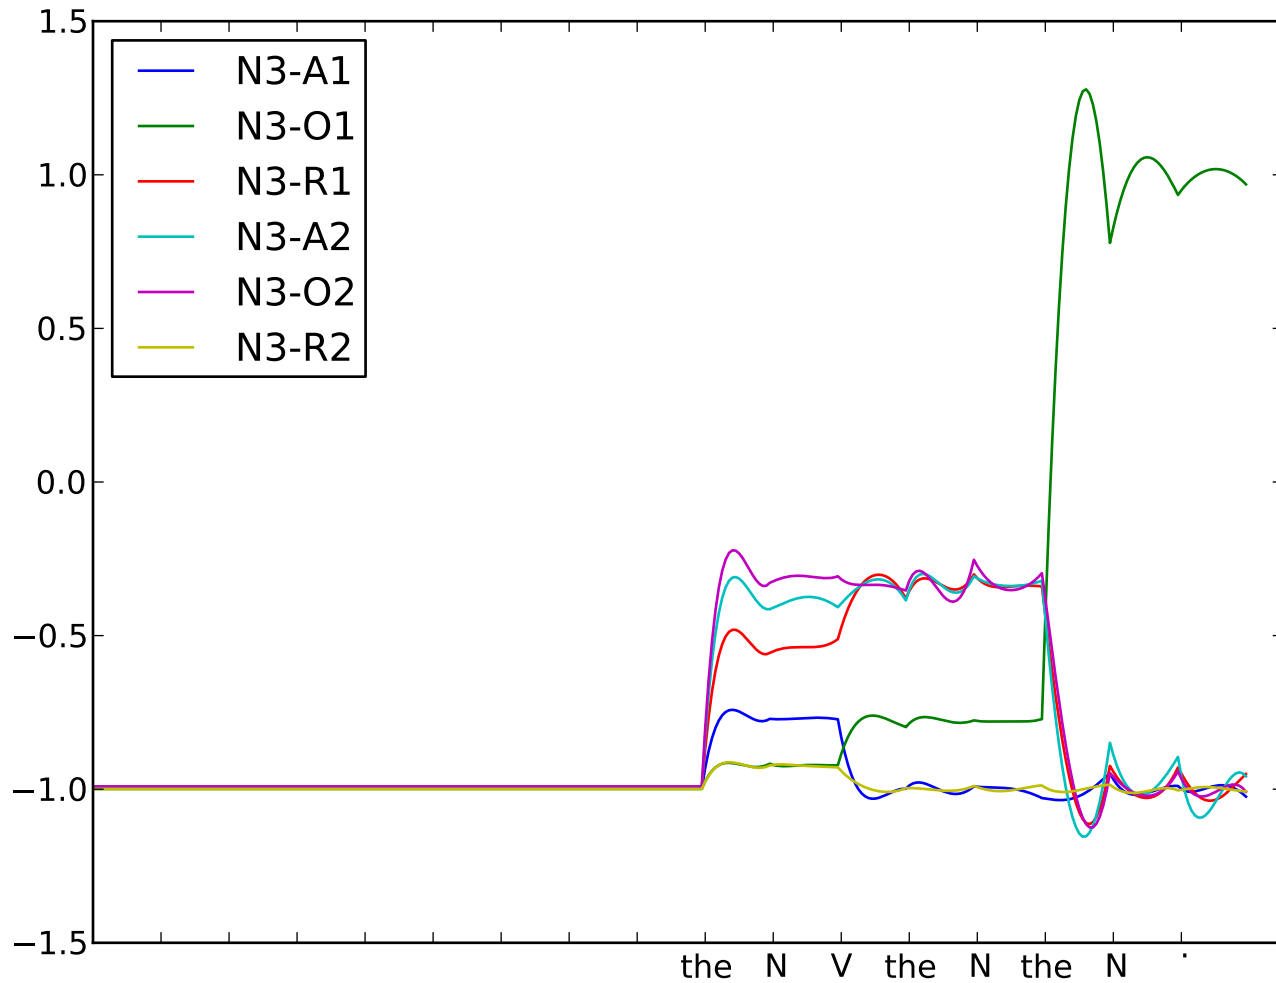

Sentence 19: 'the N V the N the N .'

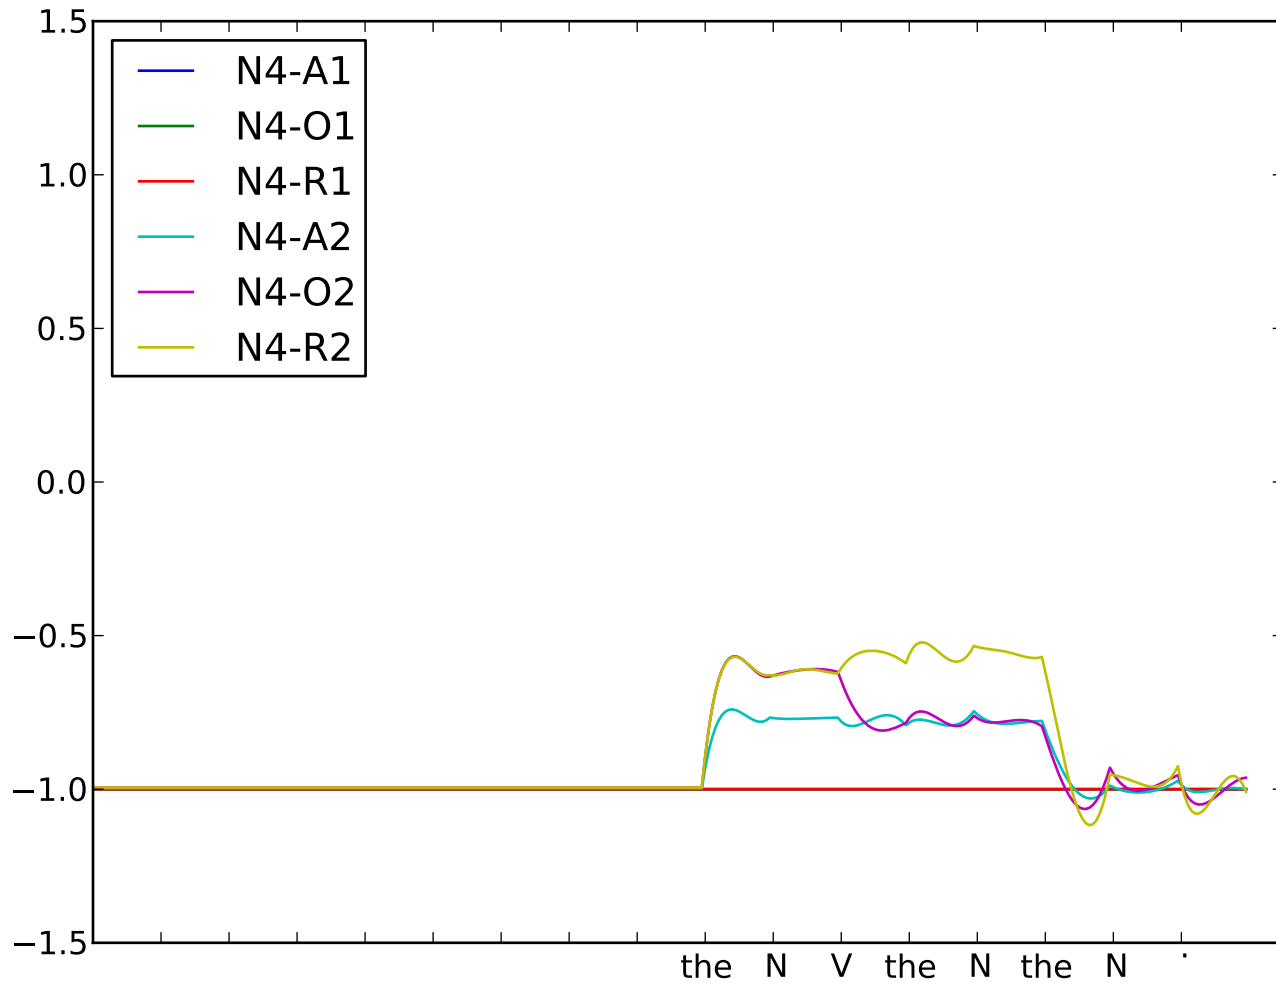



Sentence 20: 'the N that V the N V the N .'

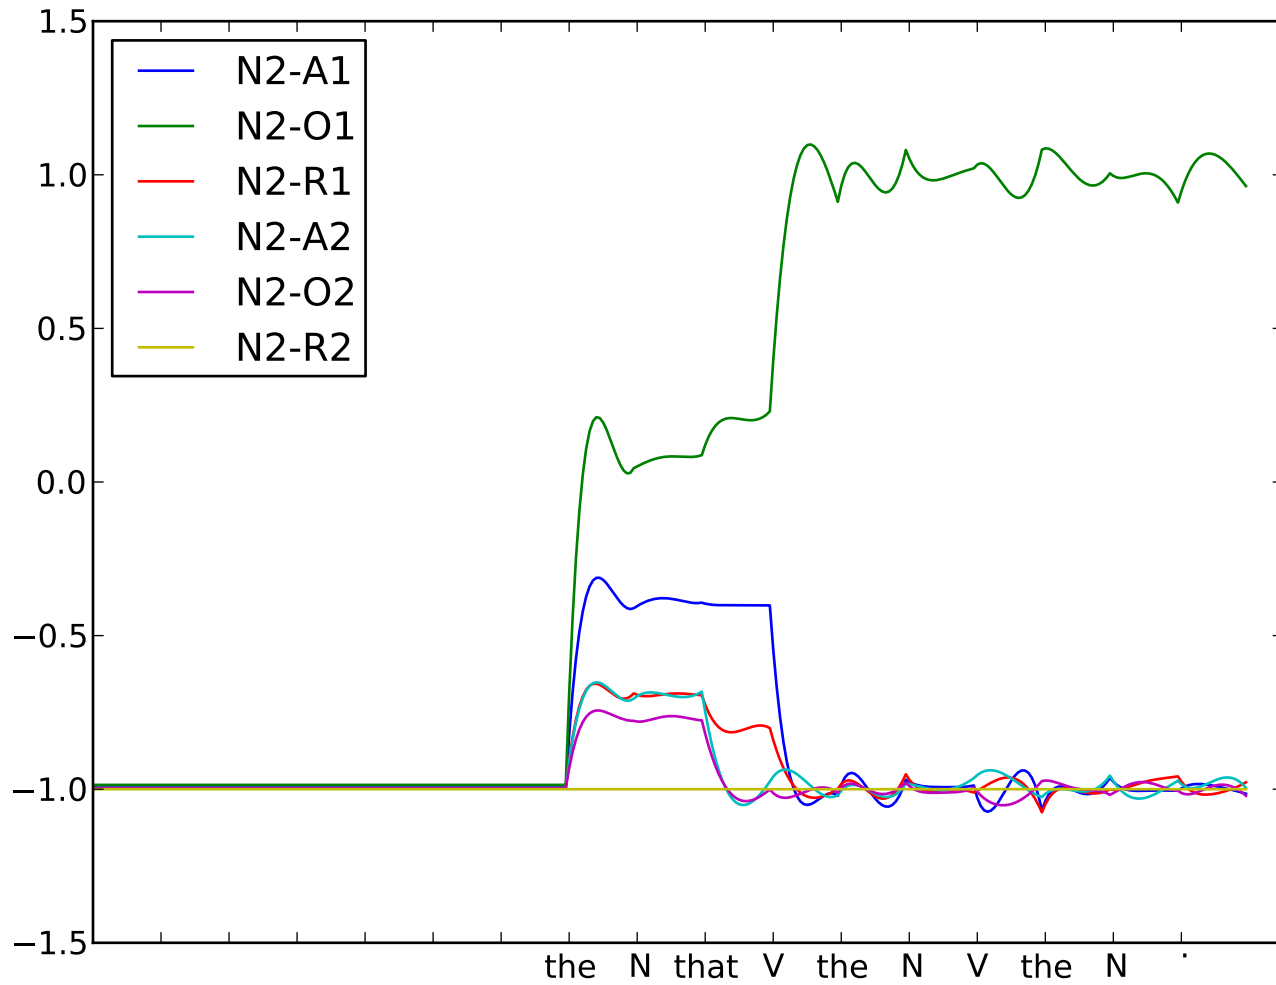

Sentence 20: 'the N that V the N V the N .'

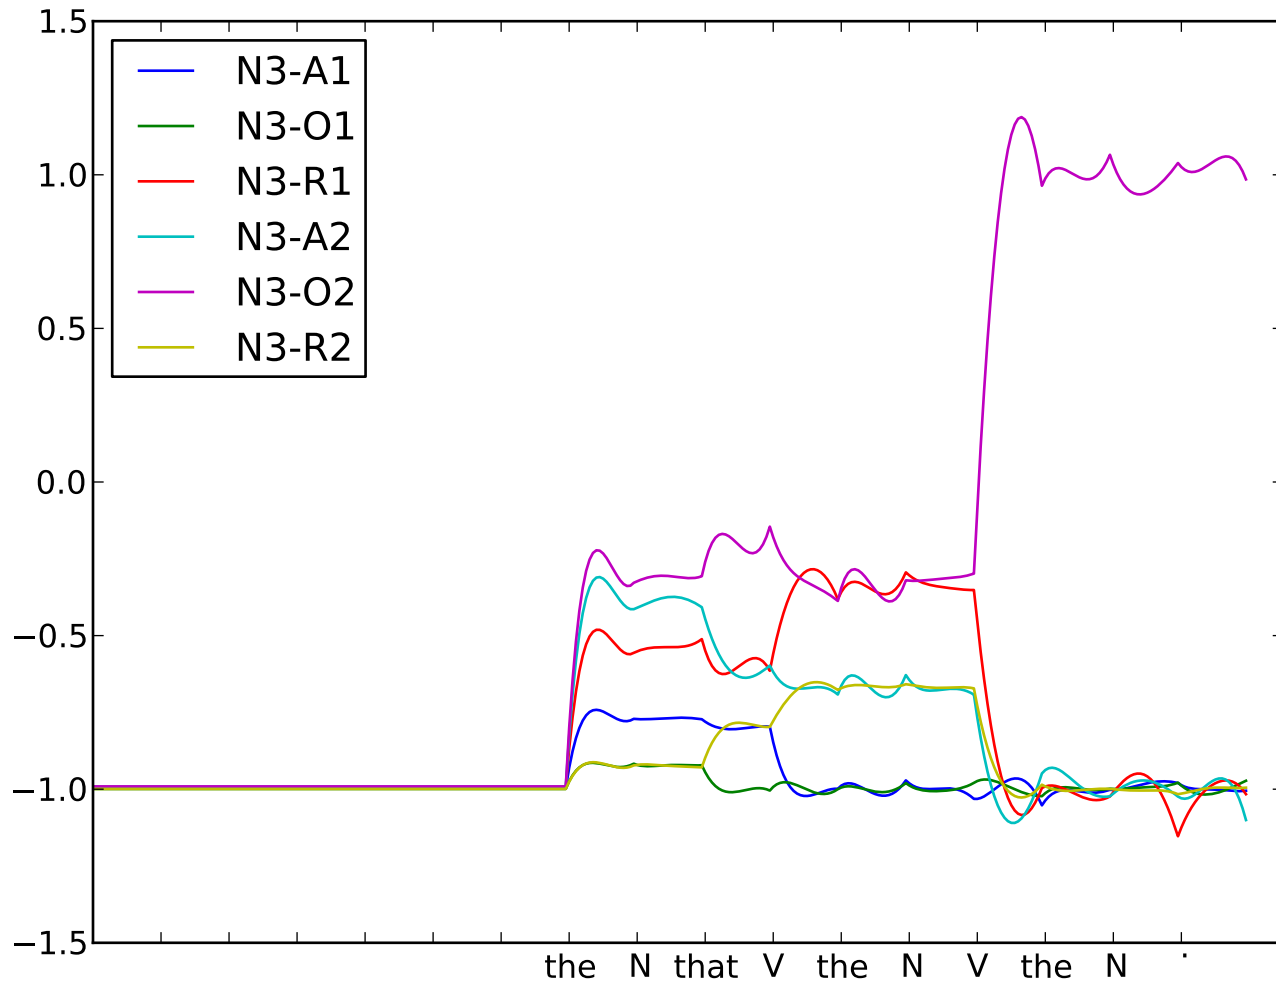

Sentence 20: 'the N that V the N V the N .'

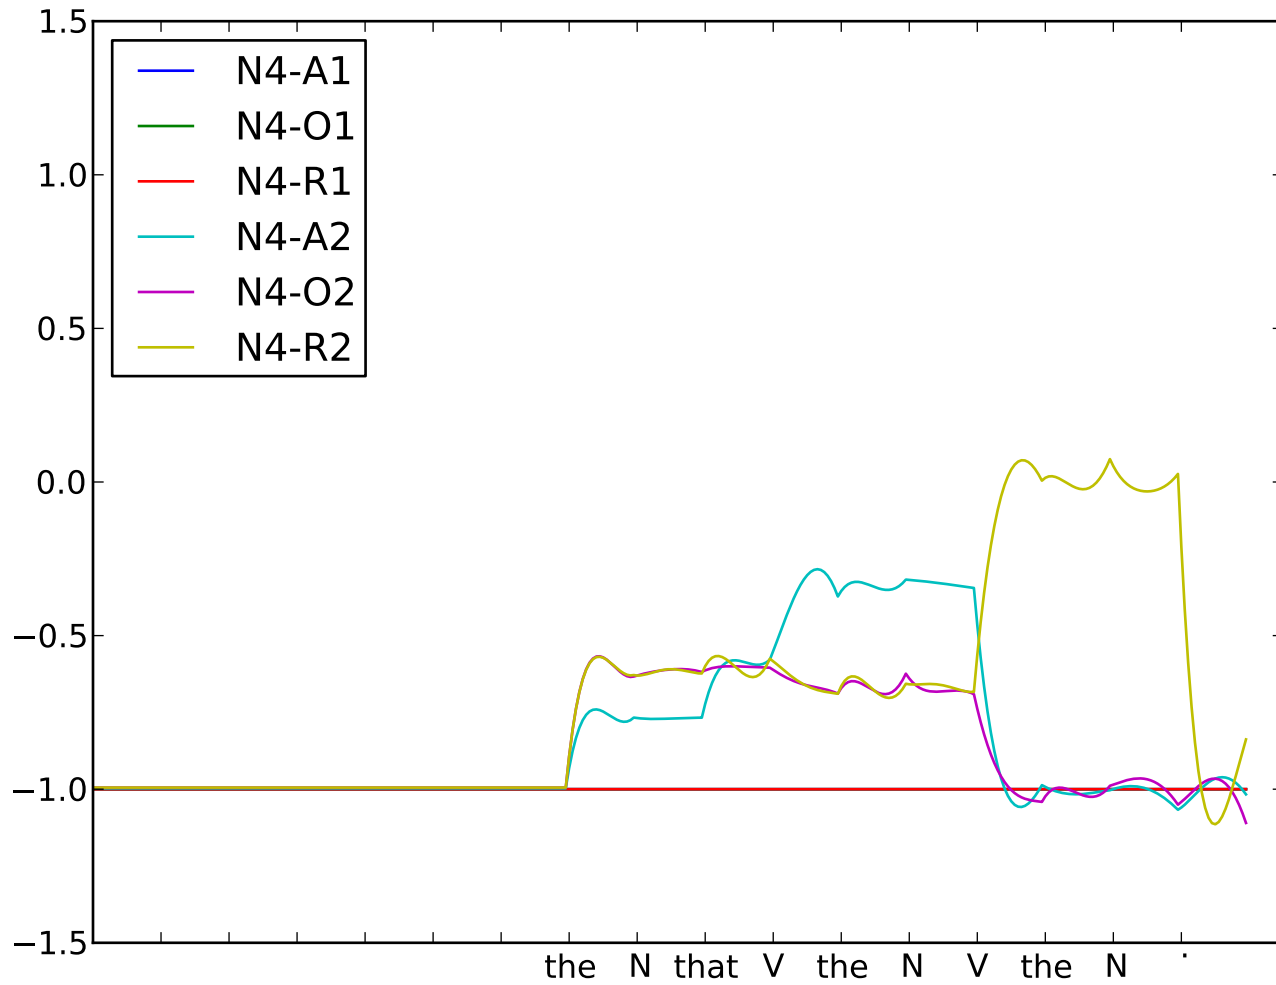



Sentence 21: 'the N was V by the N that V the N .'

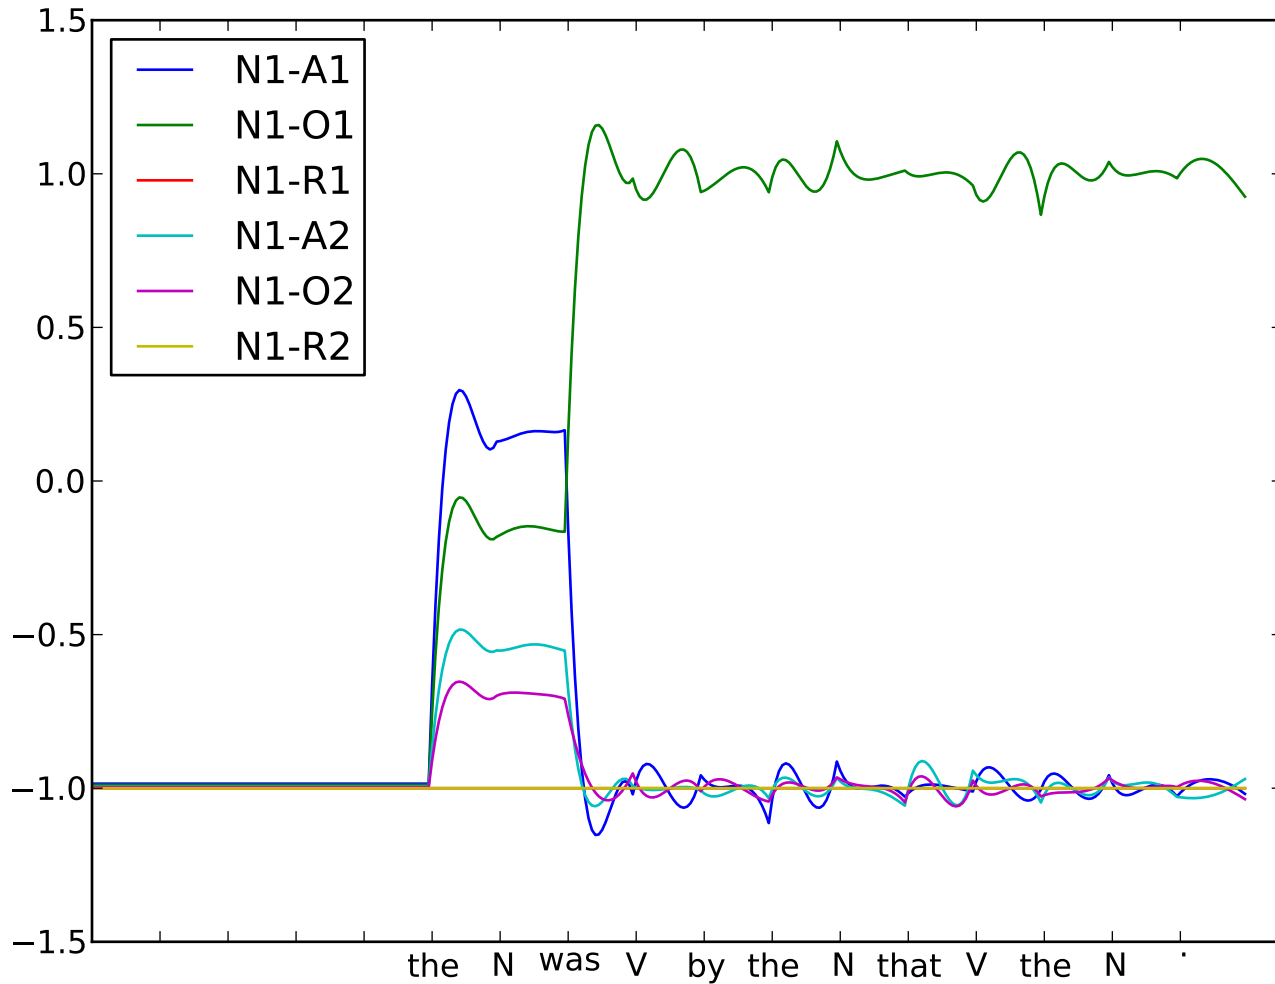

Sentence 21: 'the N was V by the N that V the N .'

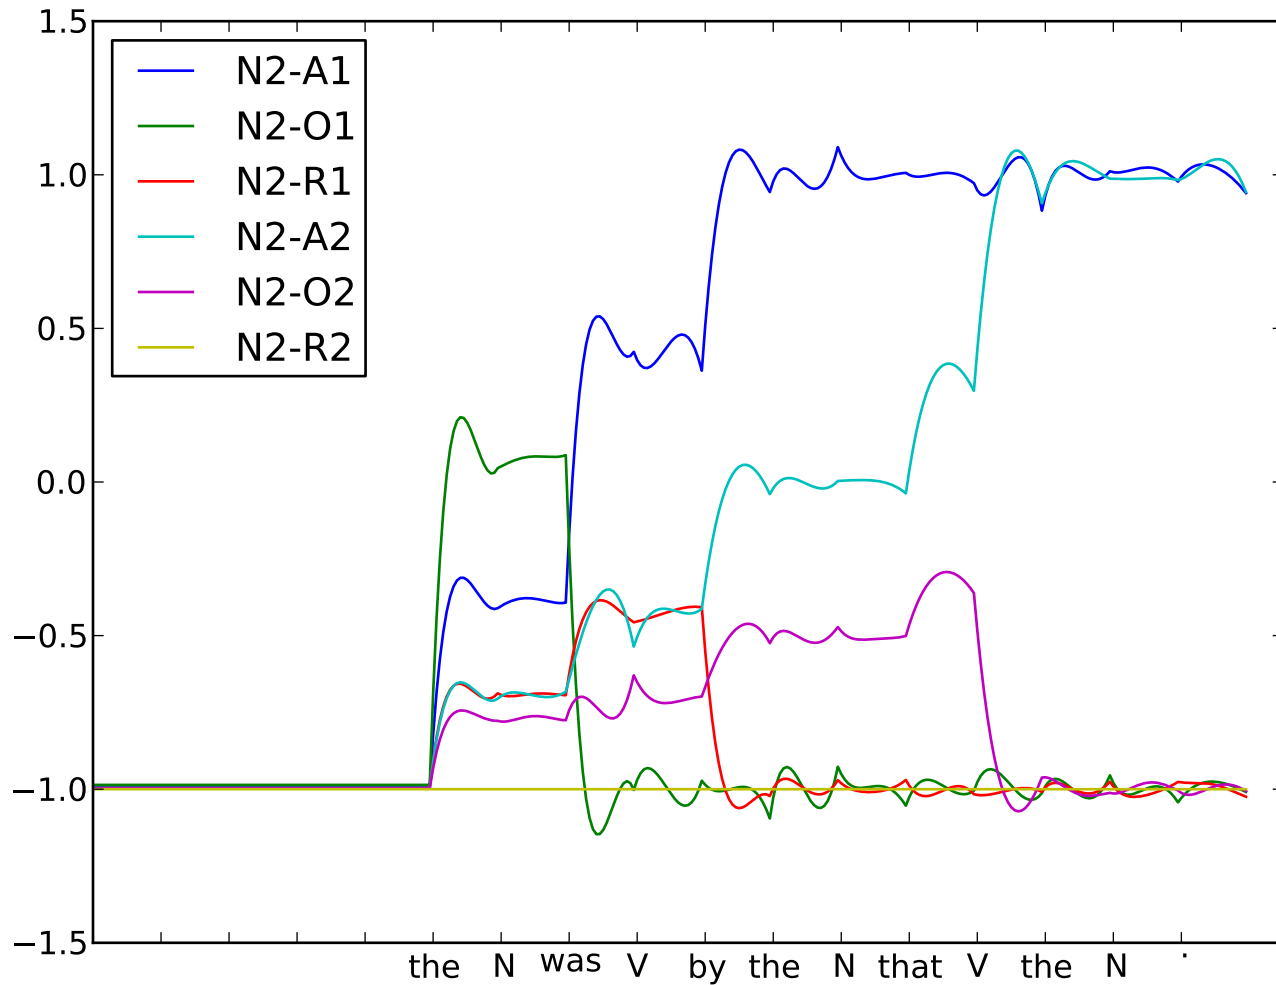

Sentence 21: 'the N was V by the N that V the N .'

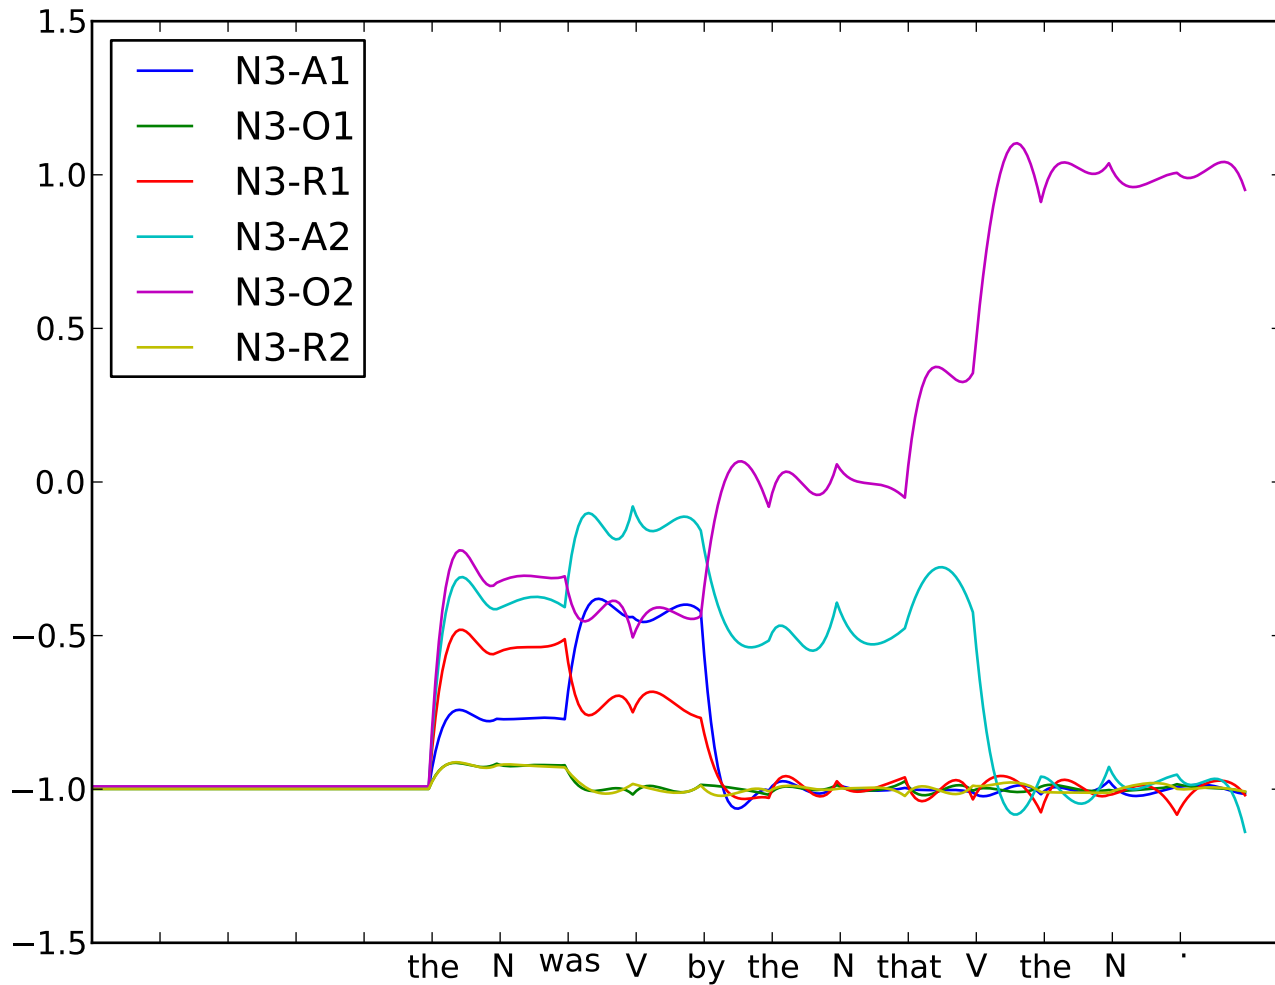

Sentence 21: 'the N was V by the N that V the N .'

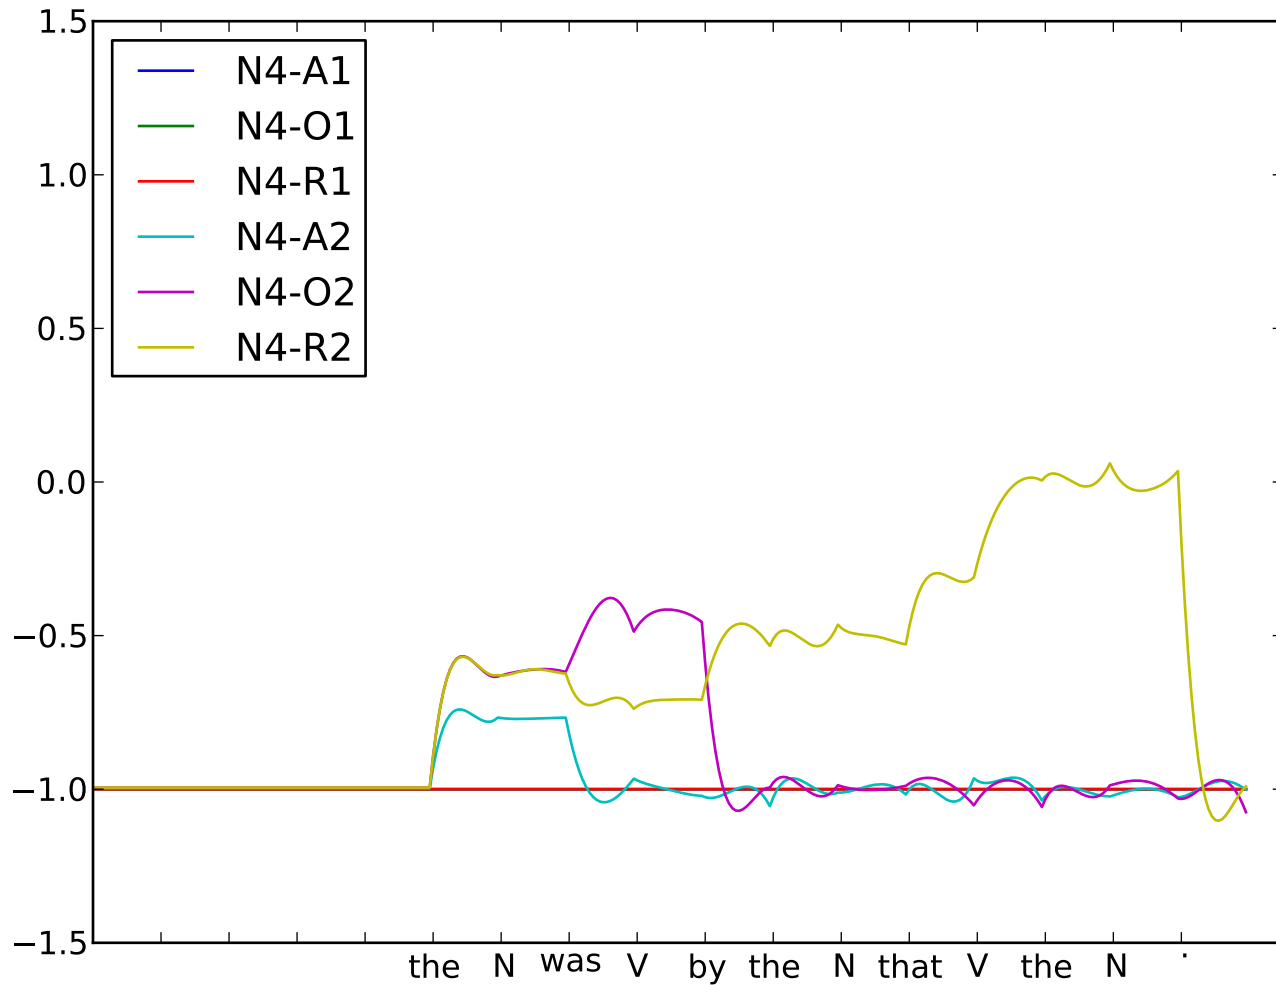

Sentence 22: 'the N that V the N was V by the N .'

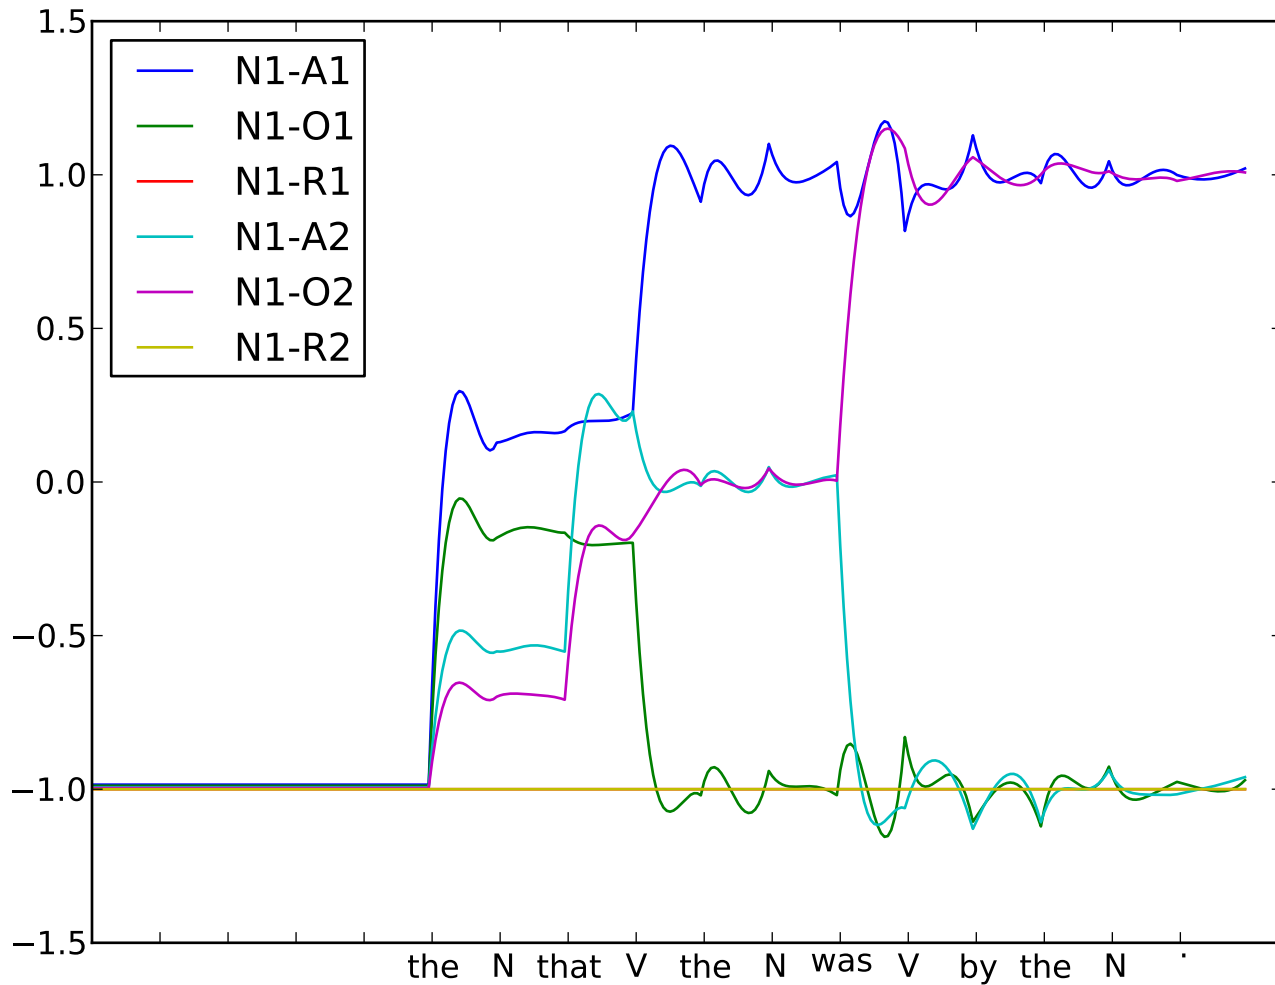

Sentence 22: 'the N that V the N was V by the N .'

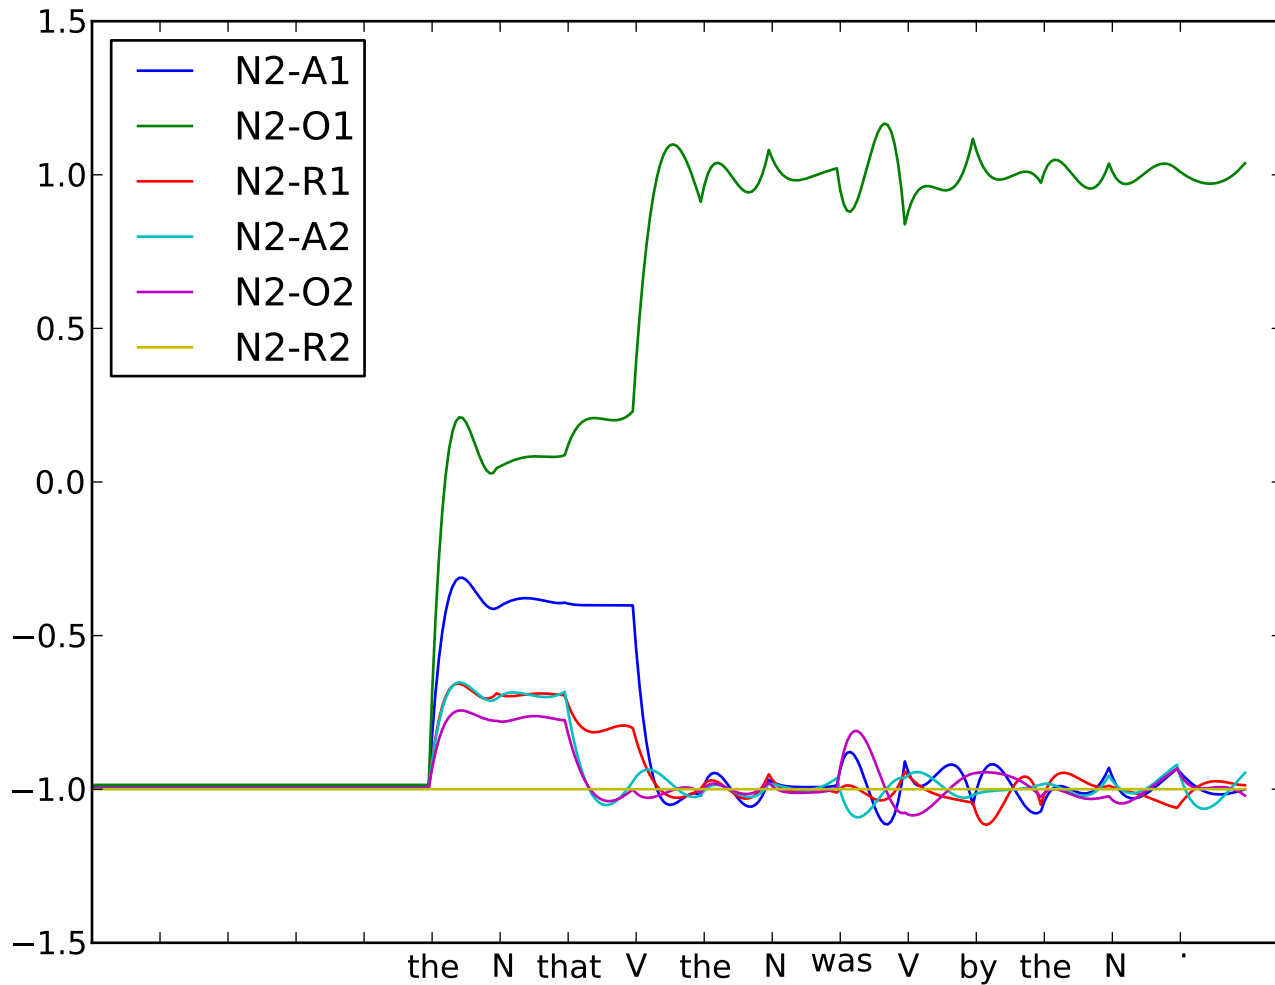

Sentence 22: 'the N that V the N was V by the N .'

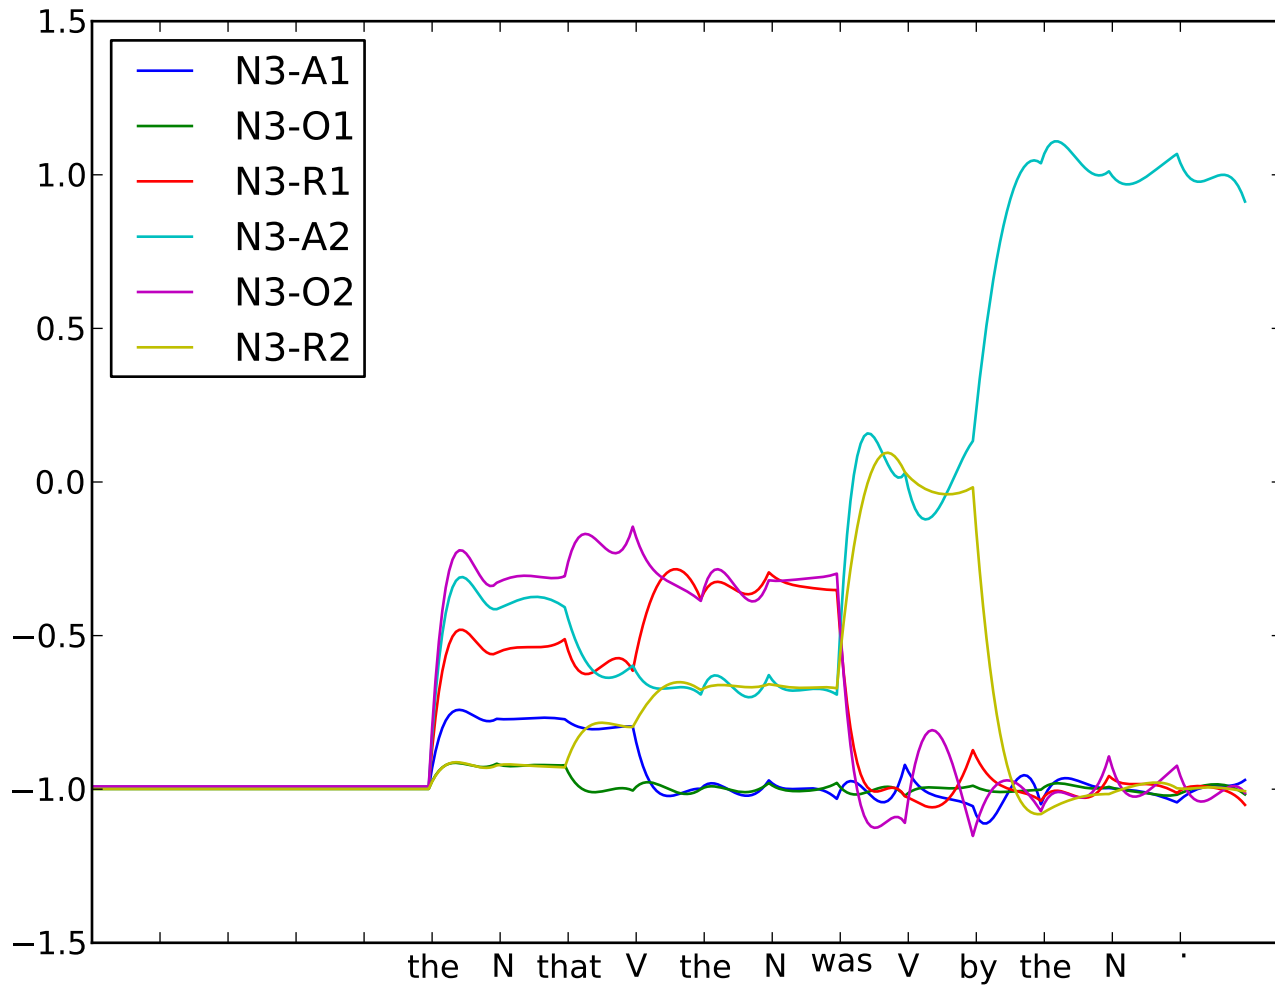

Sentence 22: 'the N that V the N was V by the N .'

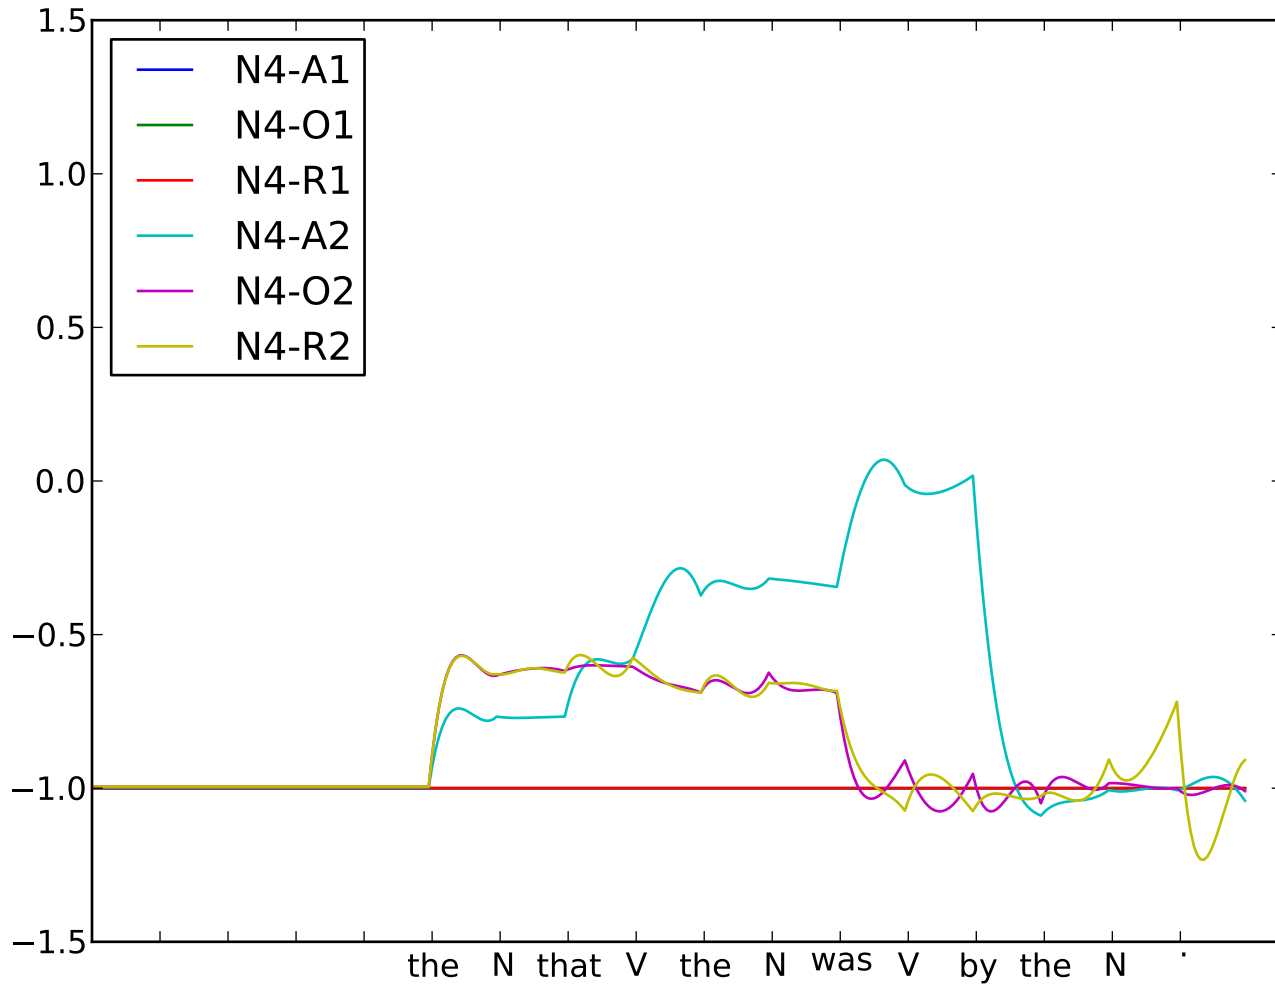





Sentence 23: 'the N V the N that V the N .'

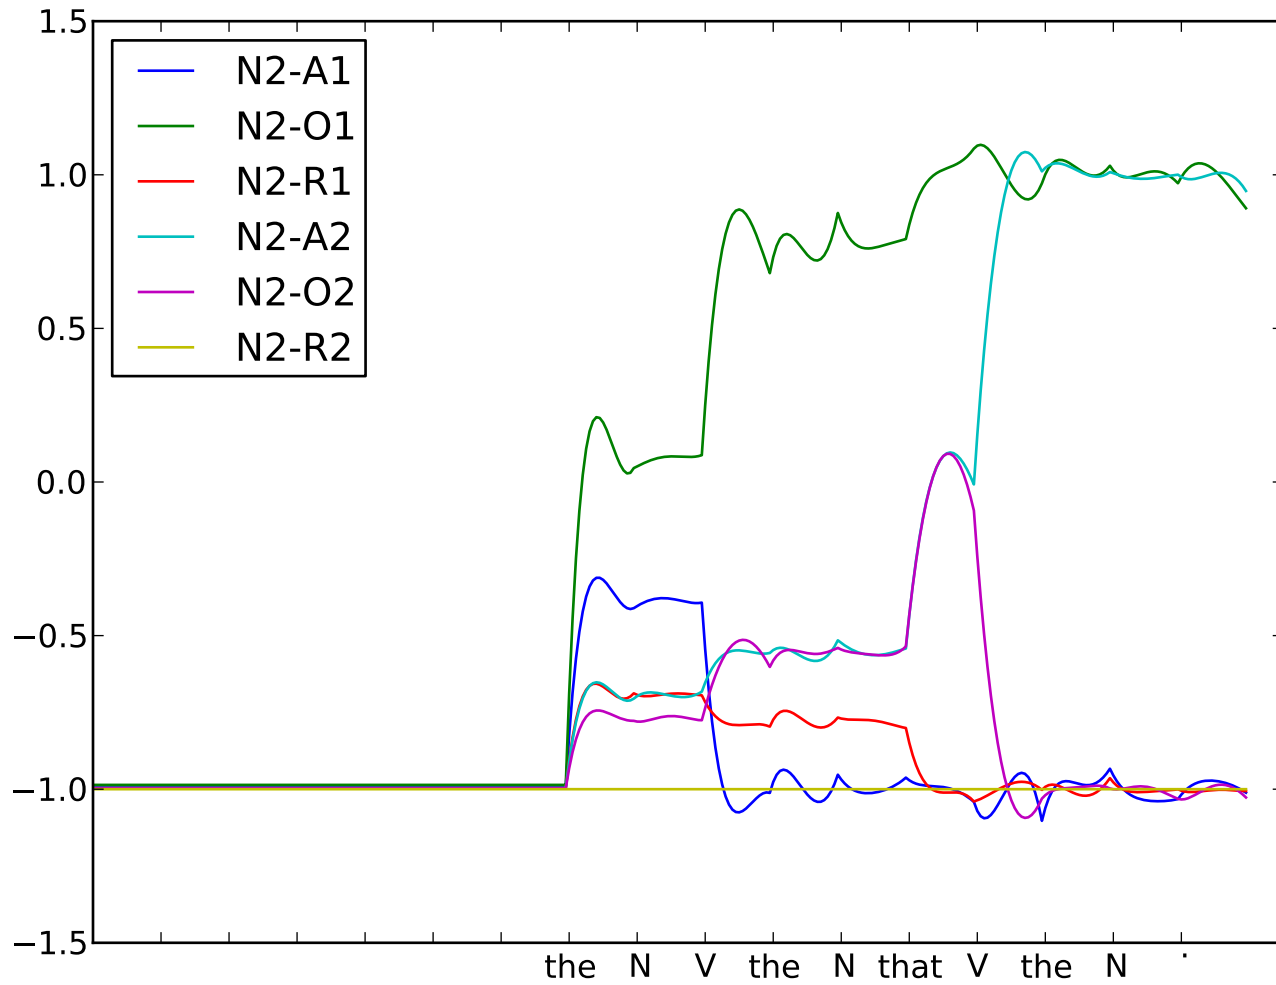

Sentence 23: 'the N V the N that V the N .'

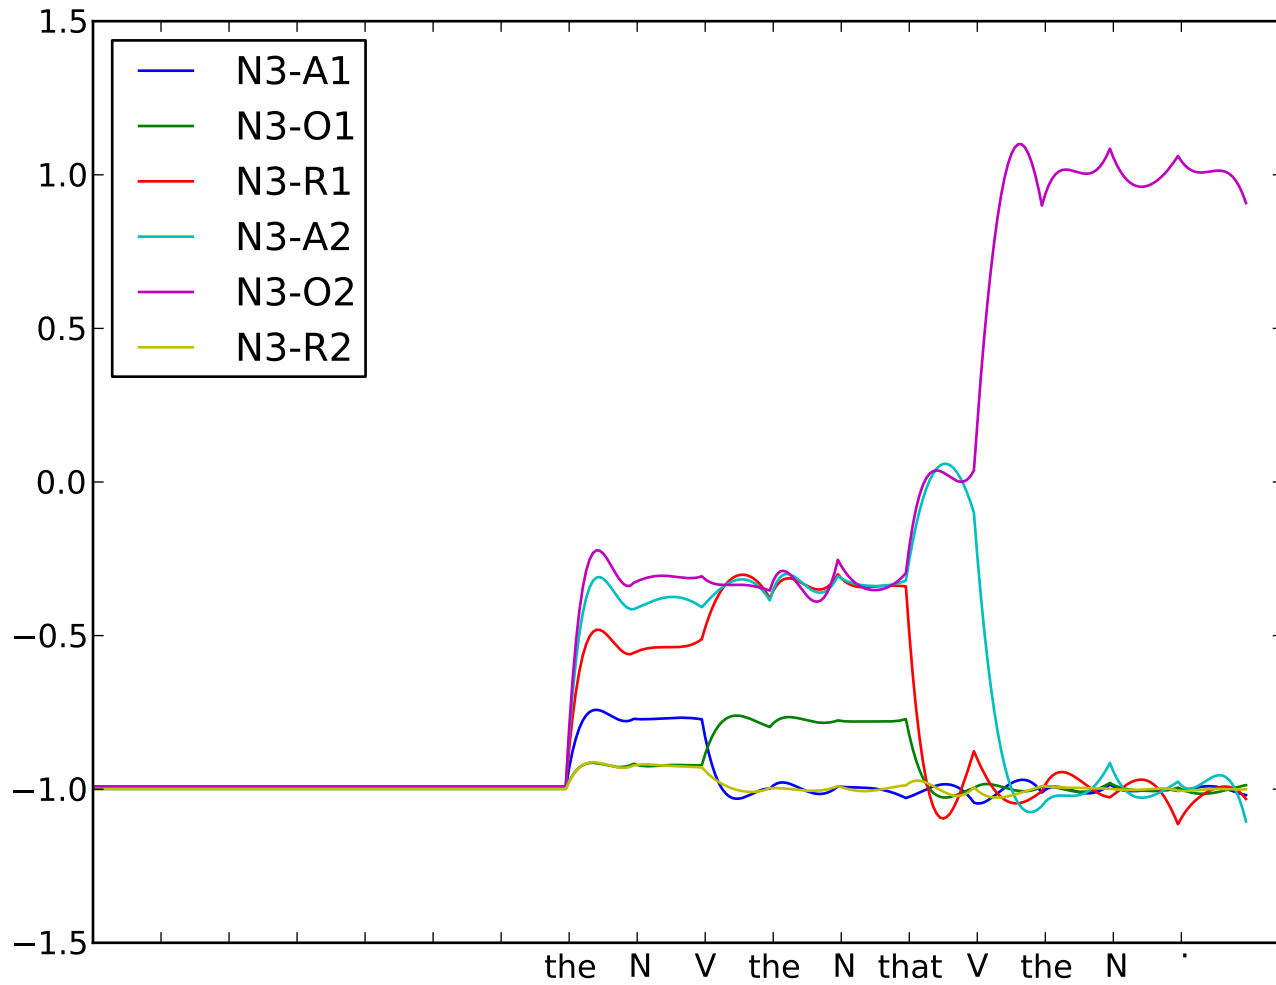

Sentence 23: 'the N V the N that V the N . '

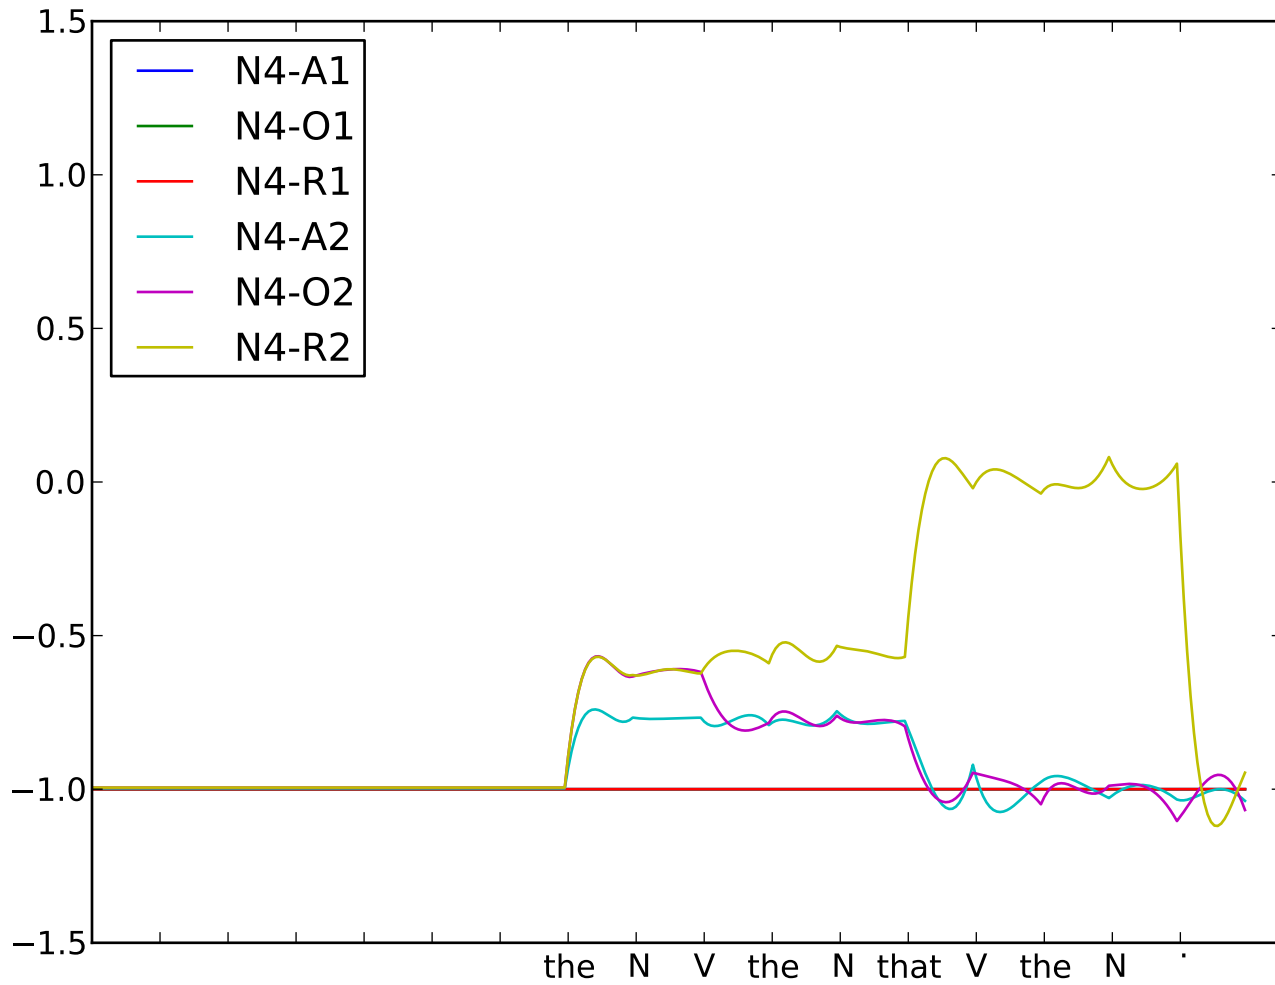

Sentence 24: 'the N that was V by the N V the N .'

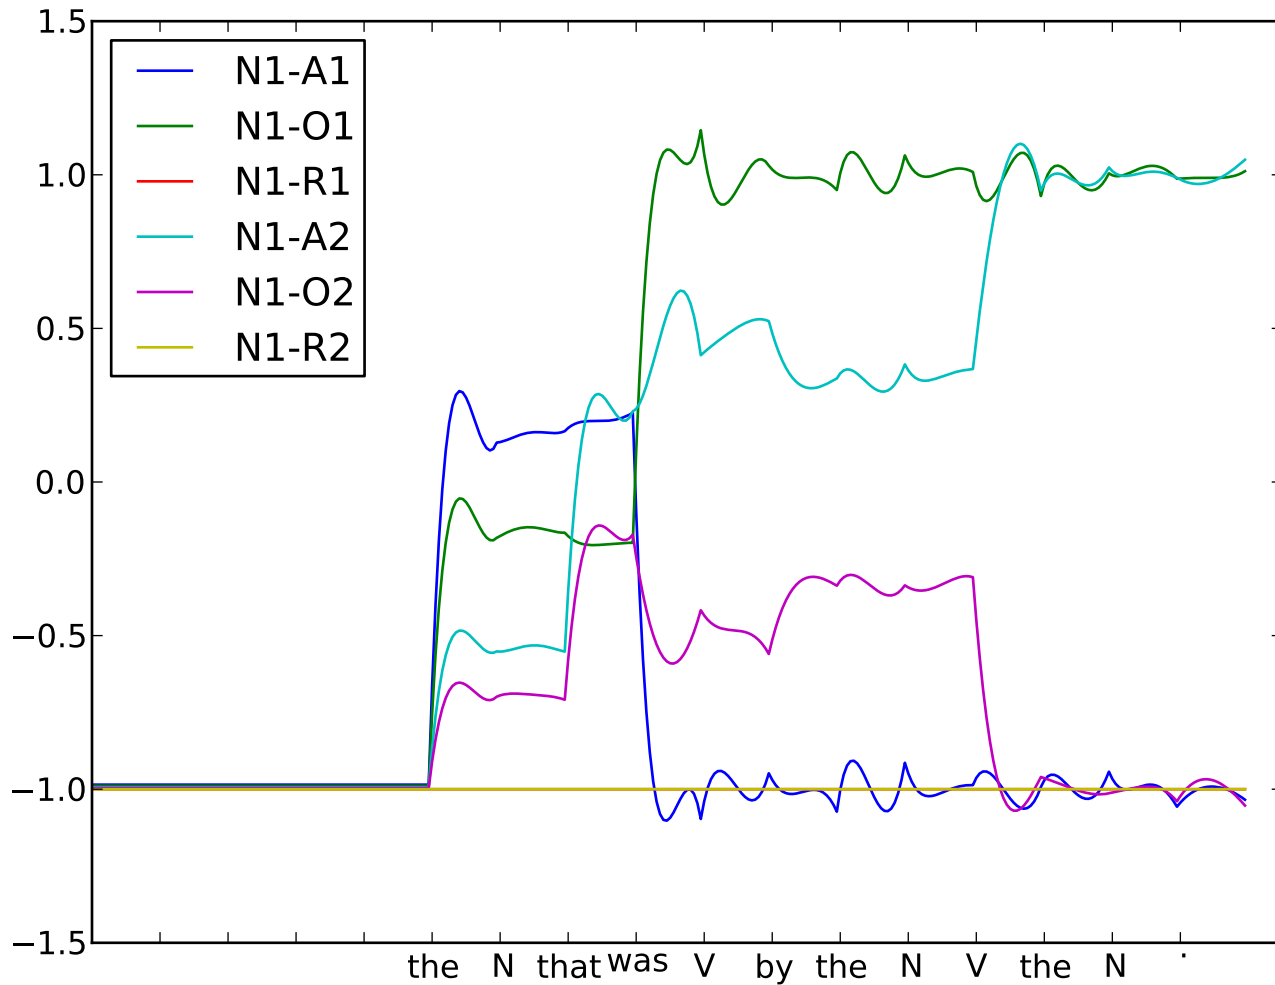

Sentence 24: 'the N that was V by the N V the N .'

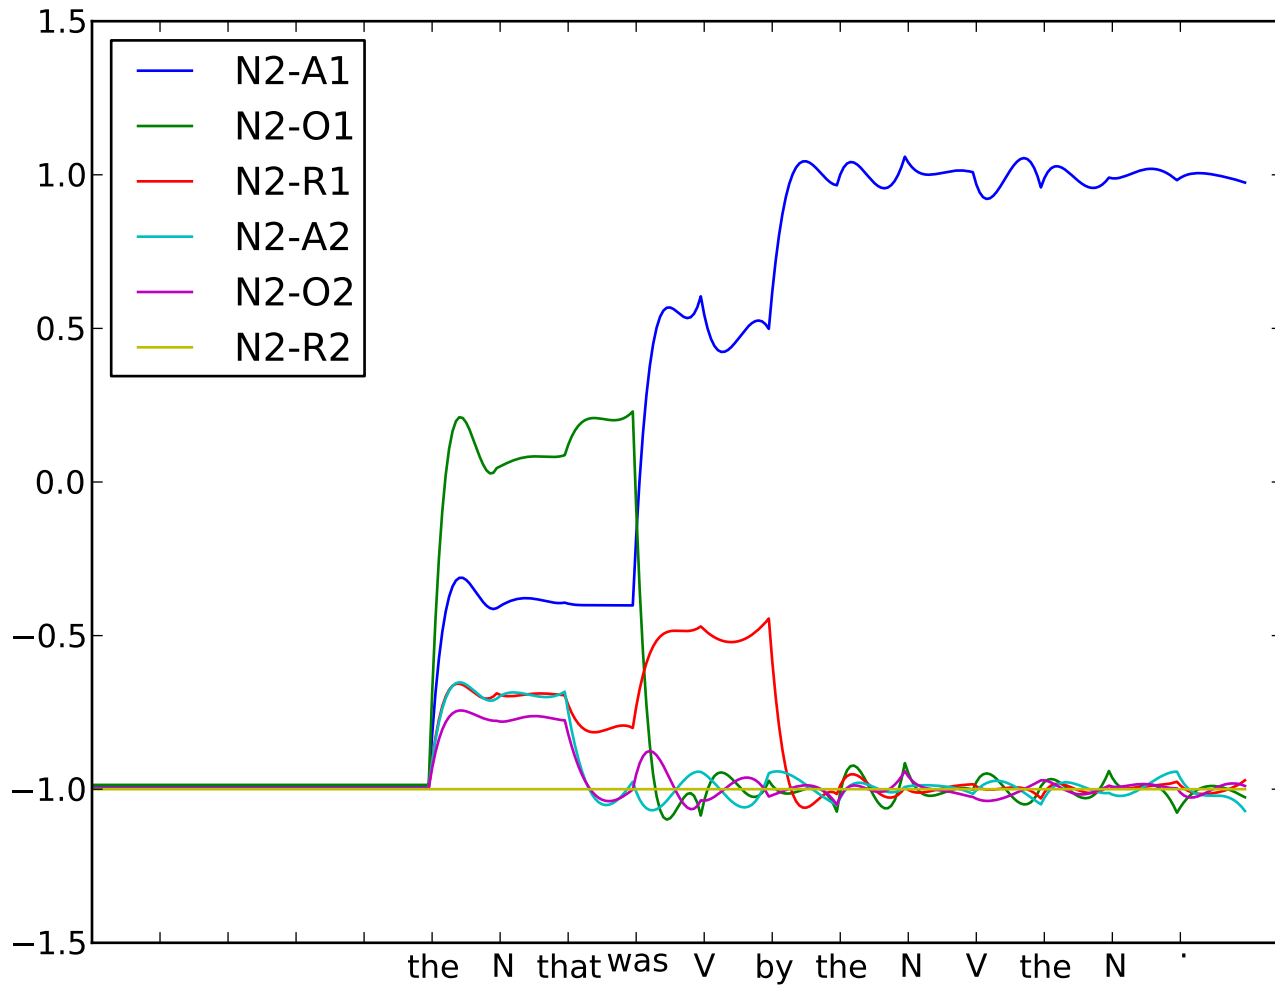

Sentence 24: 'the N that was V by the N V the N .'

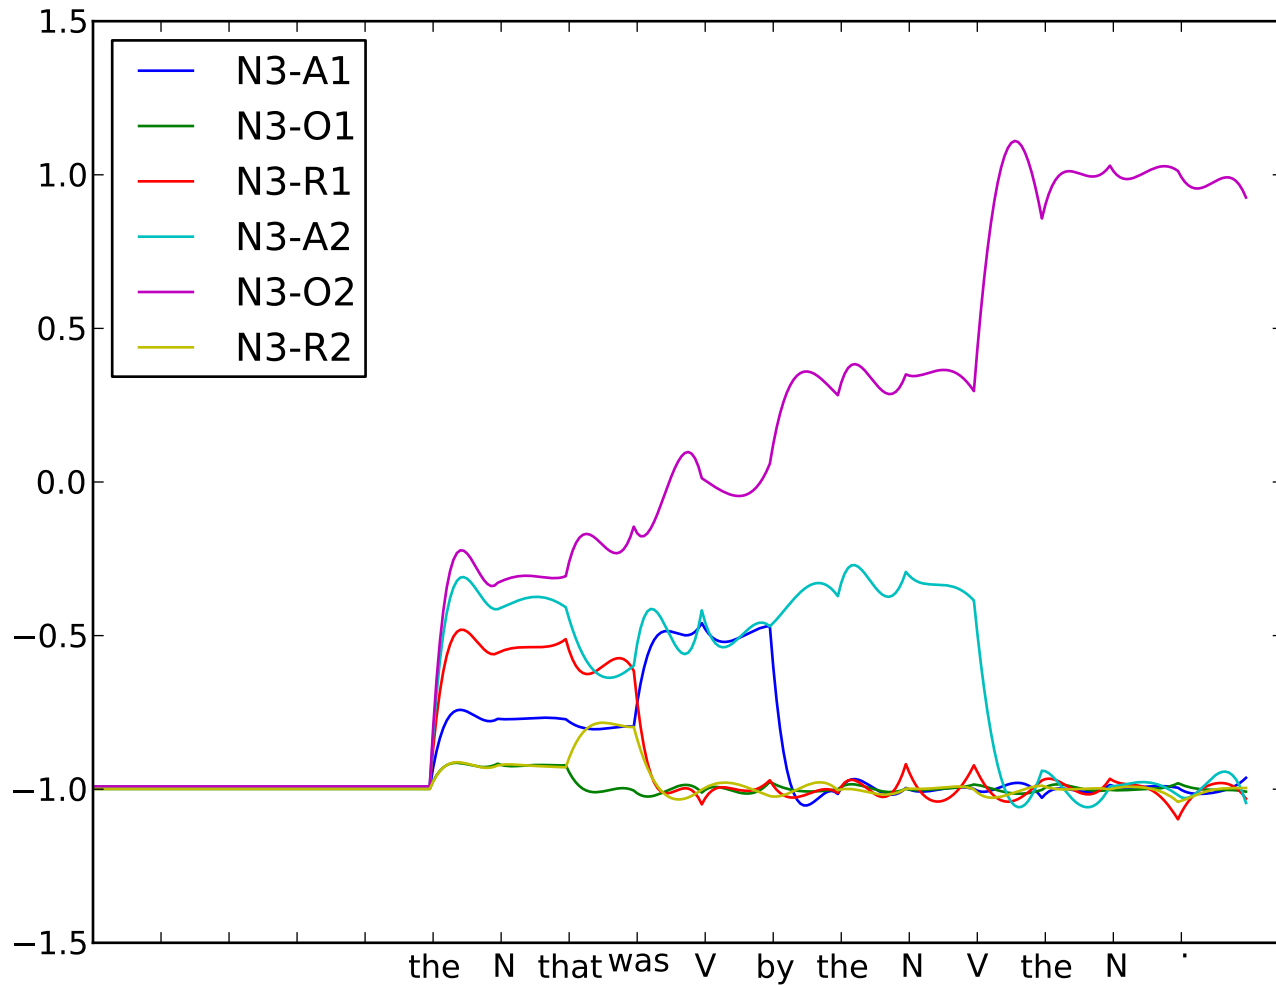

Sentence 24: 'the N that was V by the N V the N .'

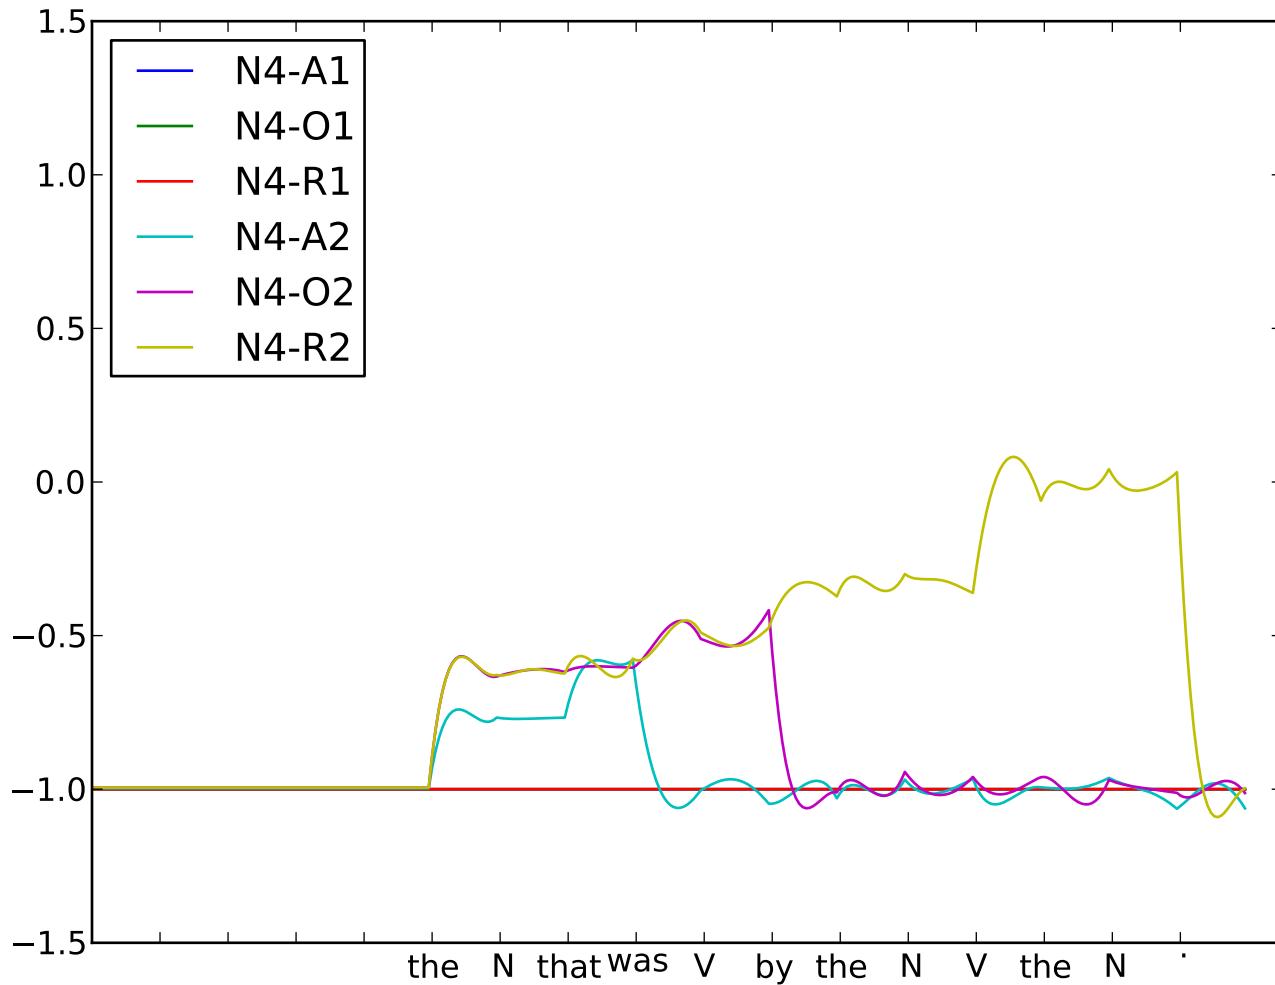



Sentence 25: 'the N was V by the N that was V by the N . '

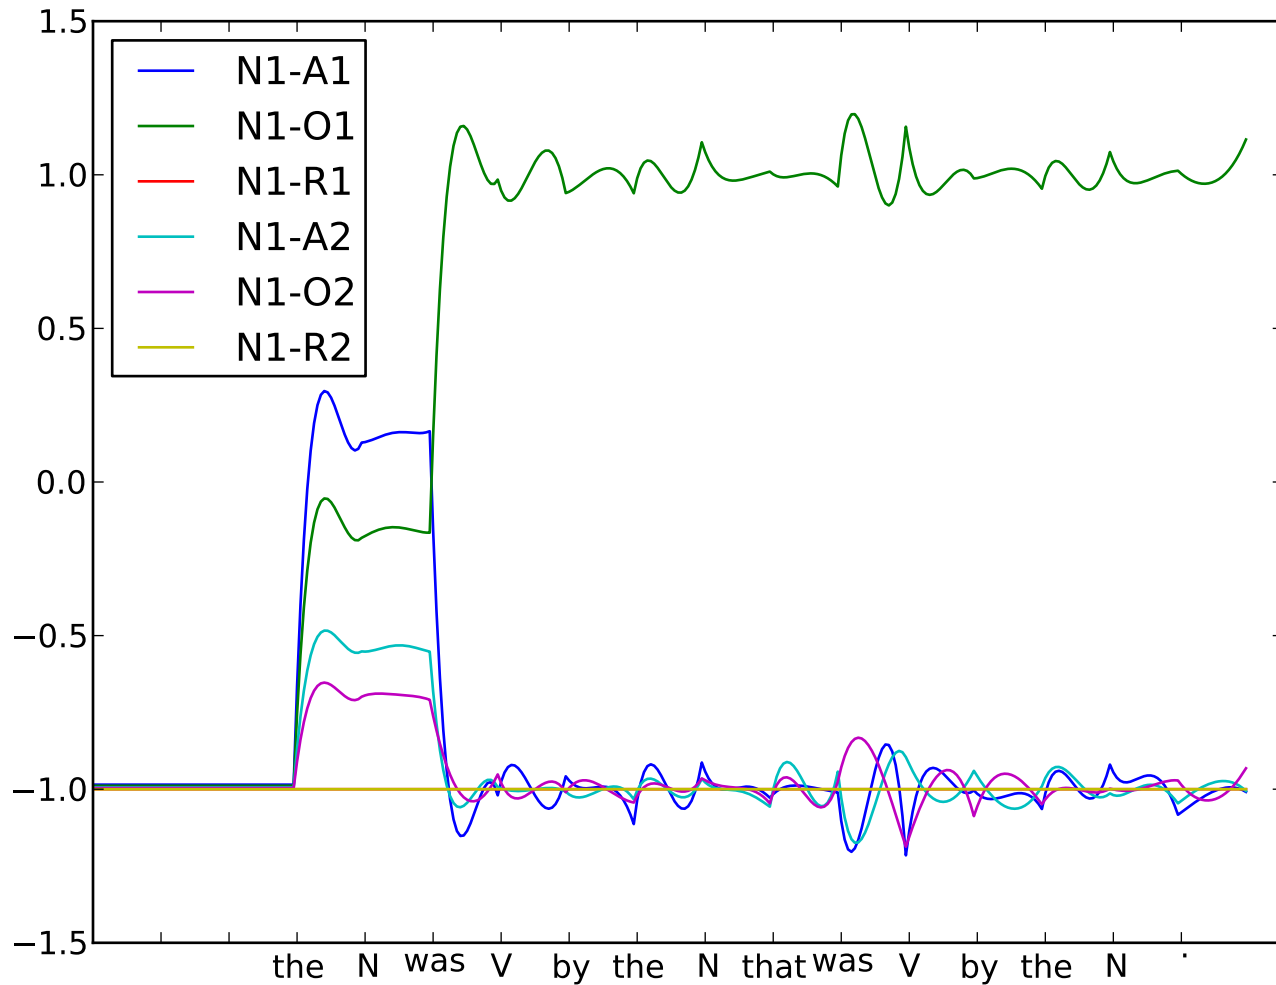

Sentence 25: 'the N was V by the N that was V by the N . '

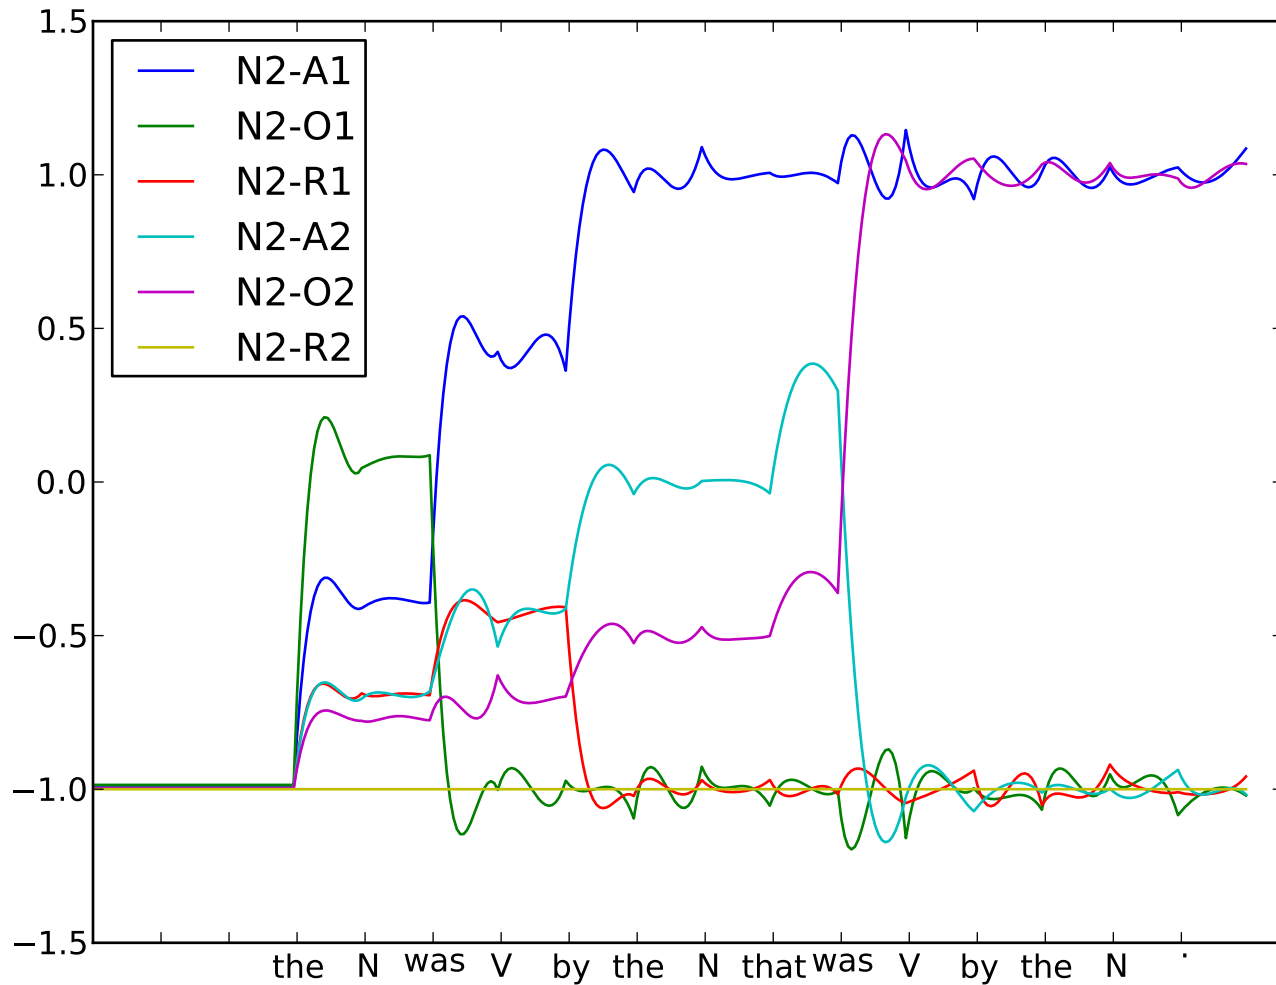

Sentence 25: 'the N was V by the N that was V by the N . '

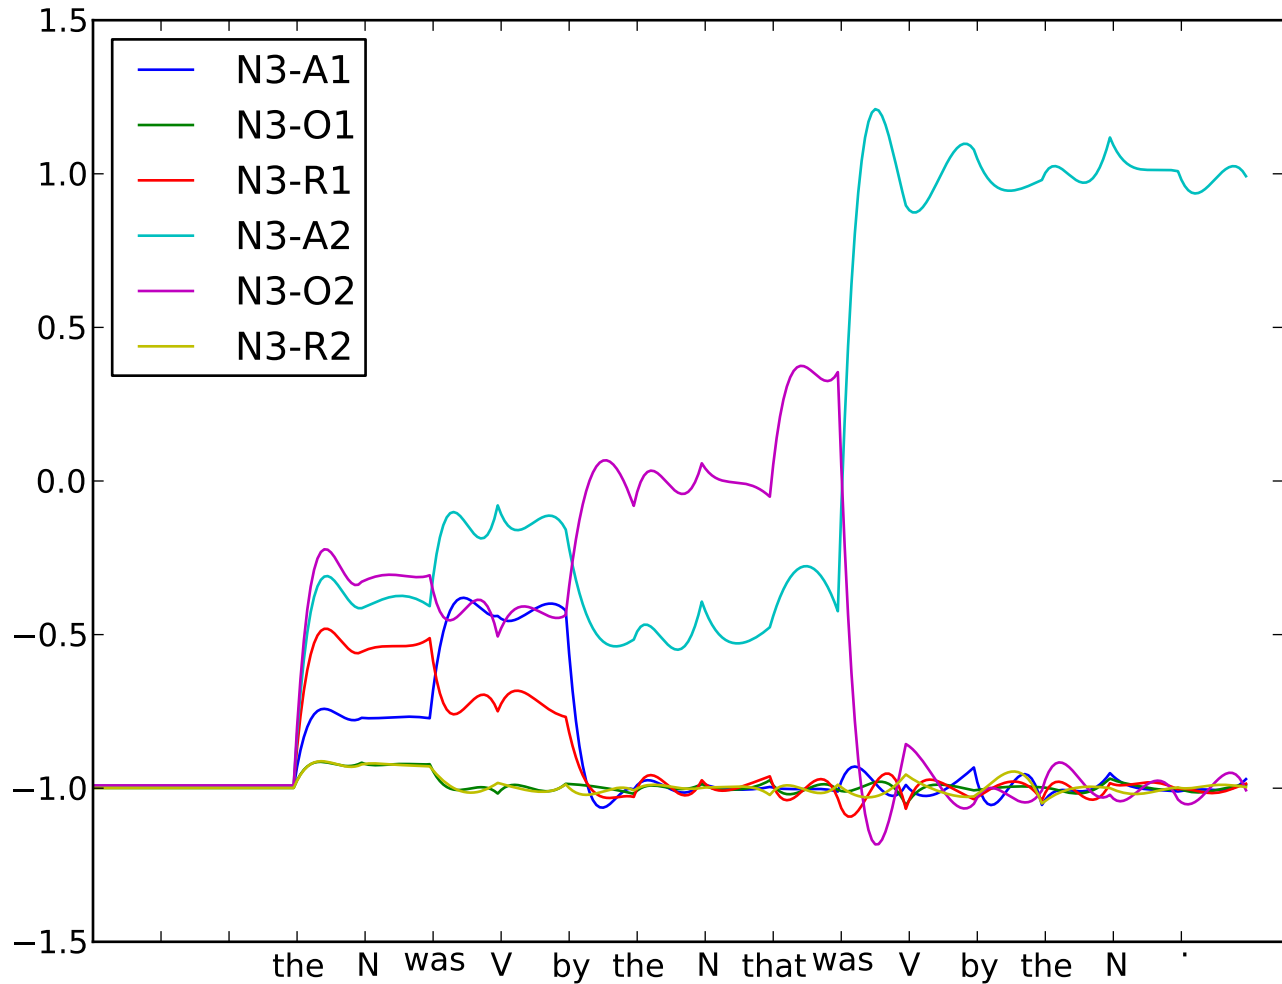

Sentence 25: 'the N was V by the N that was V by the N . '

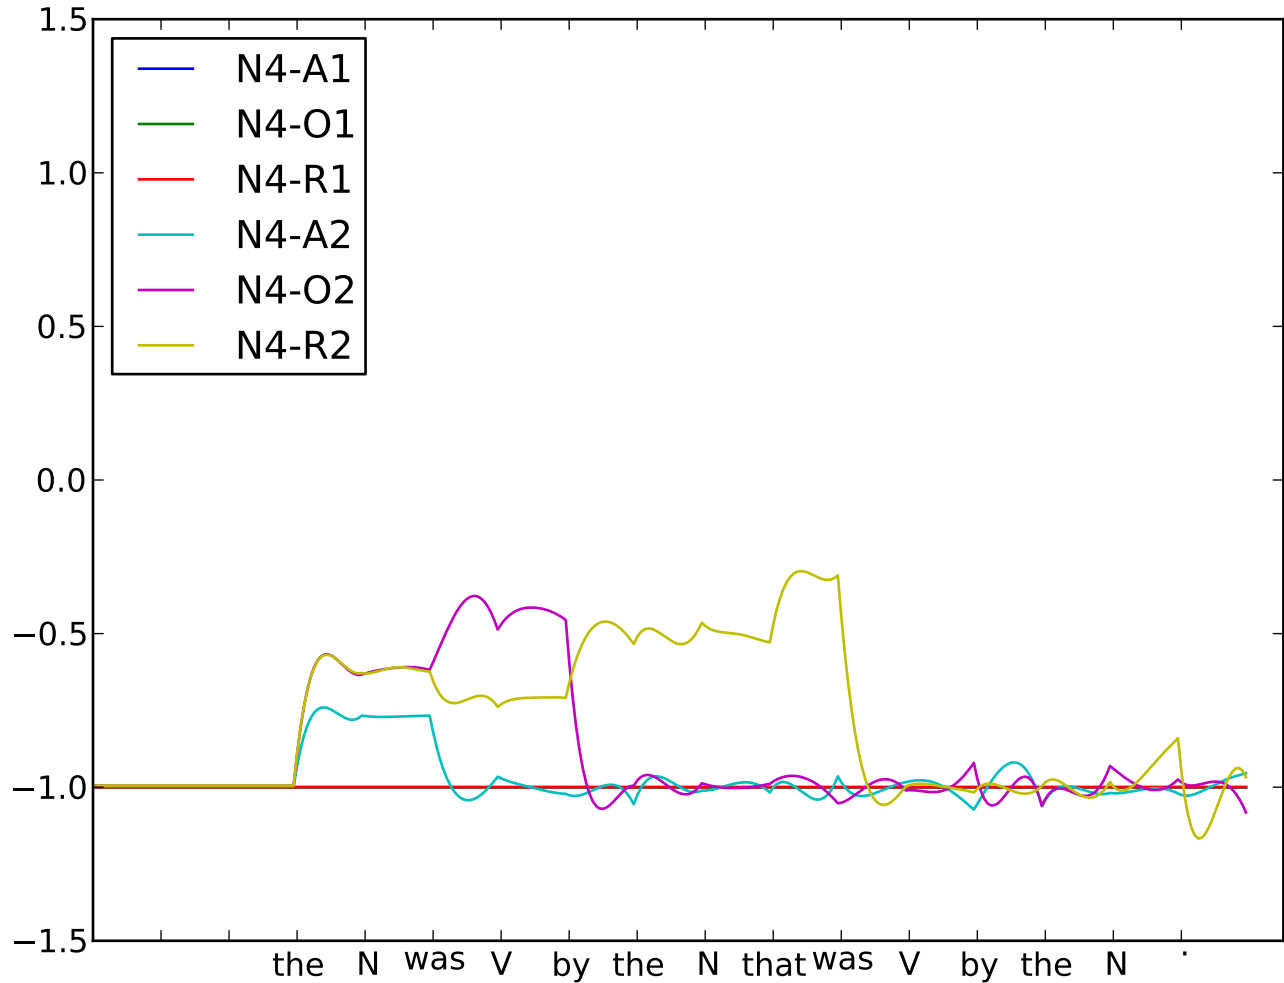

Sentence 26: 'the N that was V by the N was V by the N . '

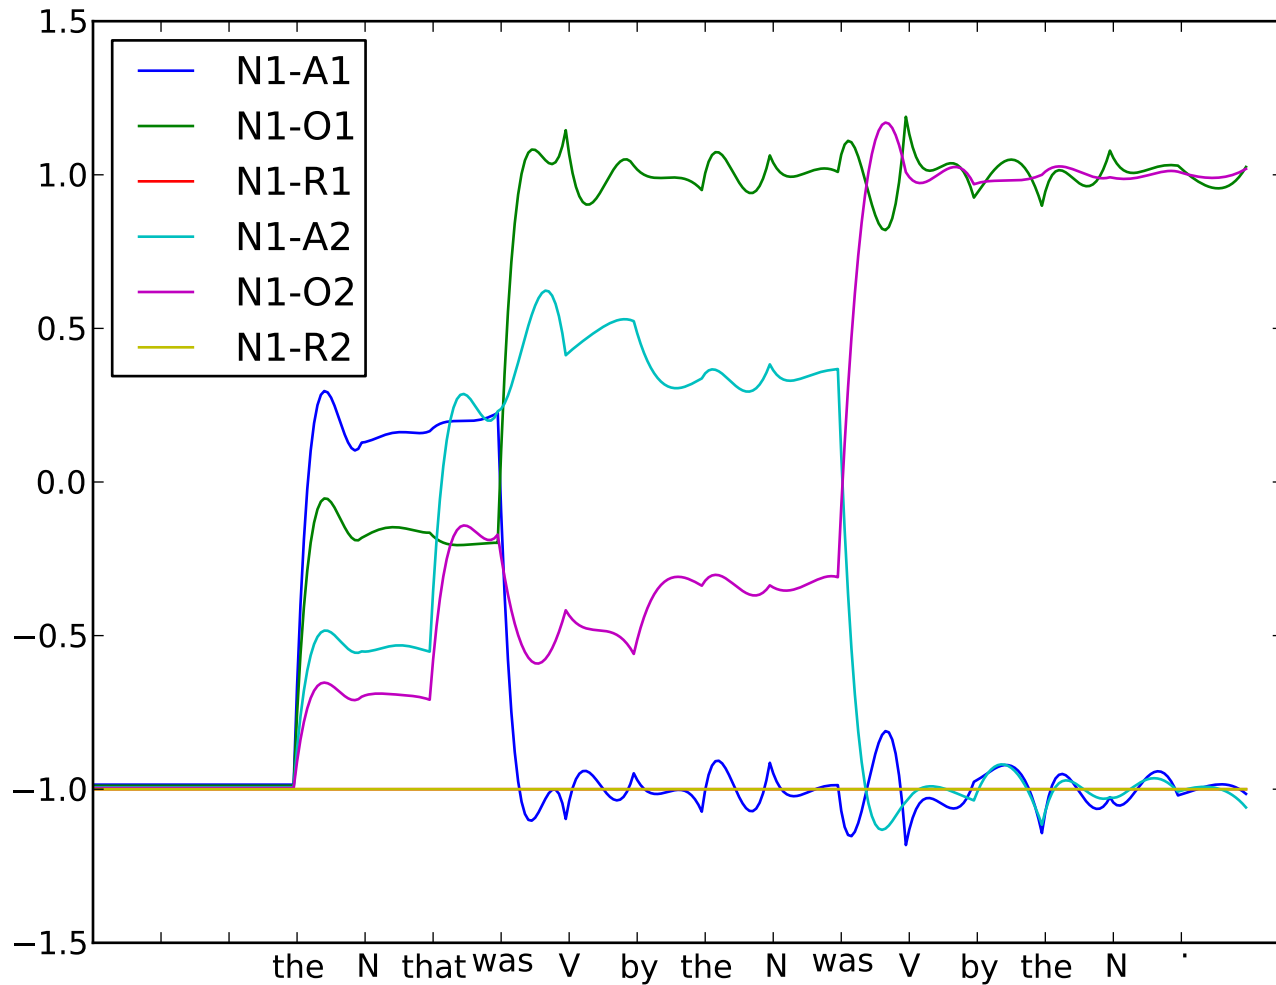

Sentence 26: 'the N that was V by the N was V by the N .'

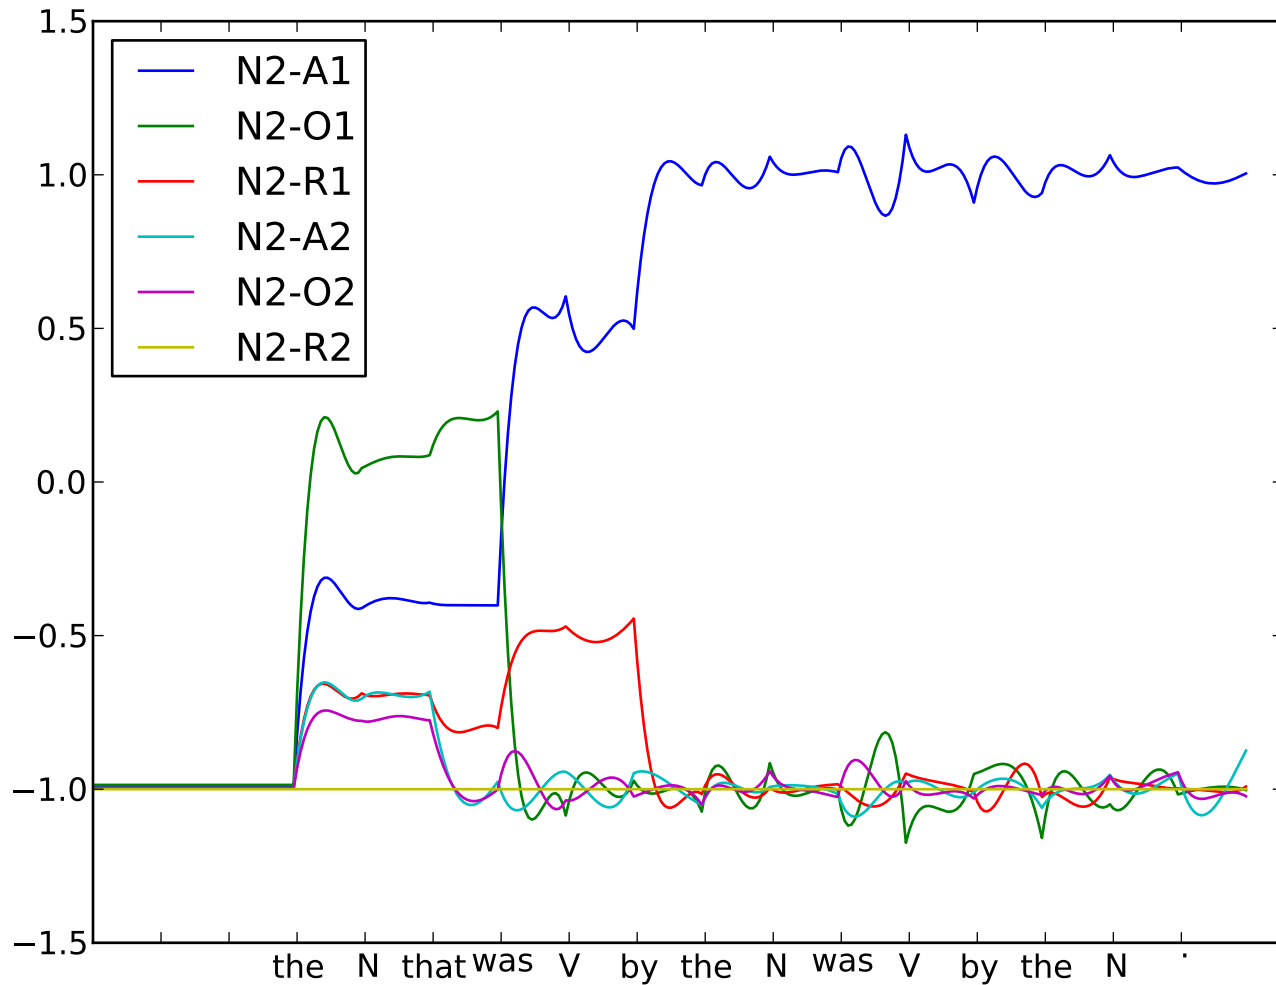

Sentence 26: 'the N that was V by the N was V by the N .'

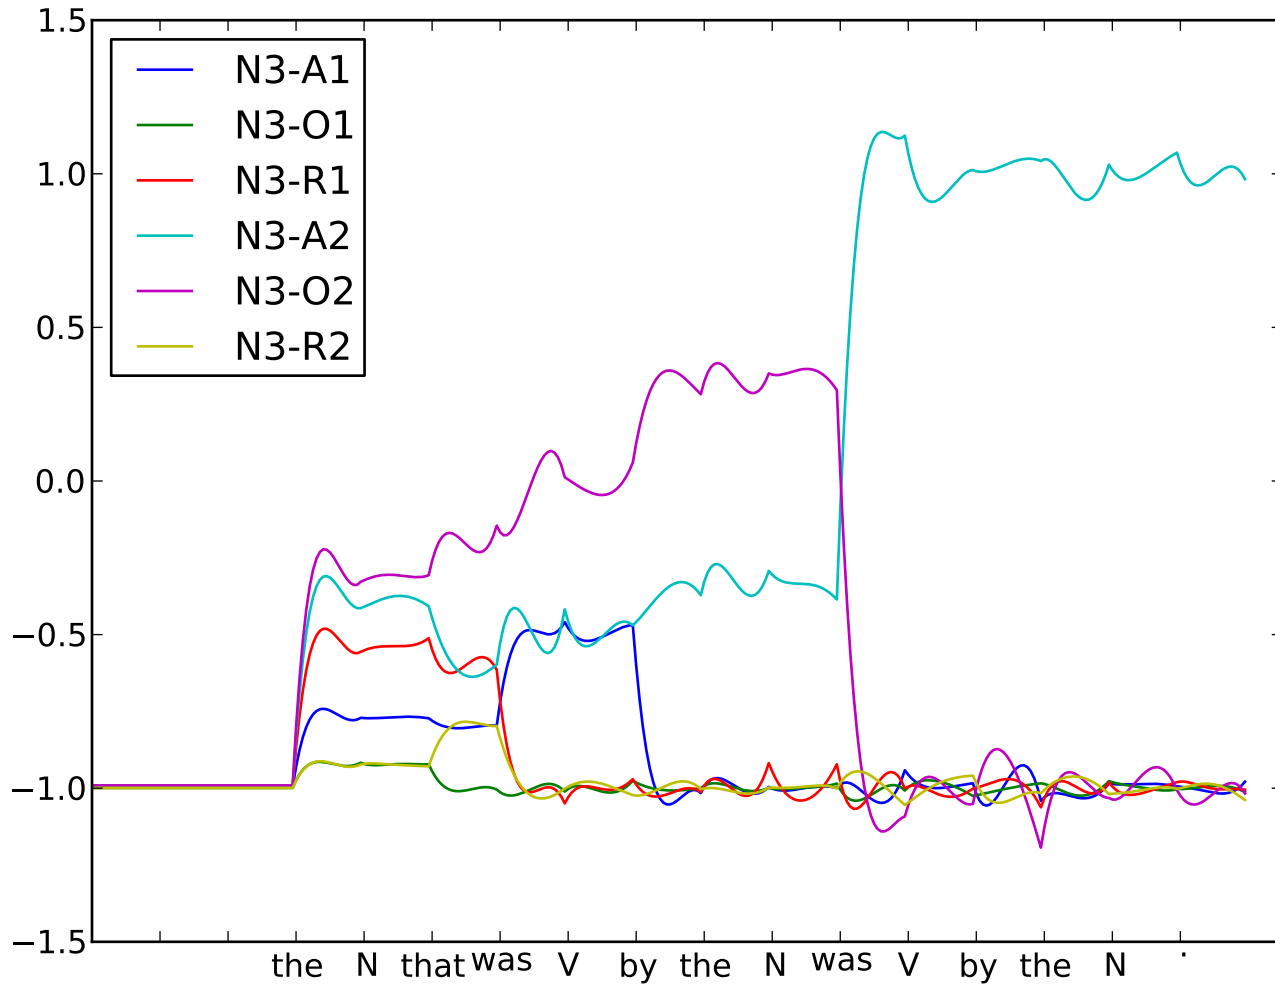

Sentence 26: 'the N that was V by the N was V by the N .'

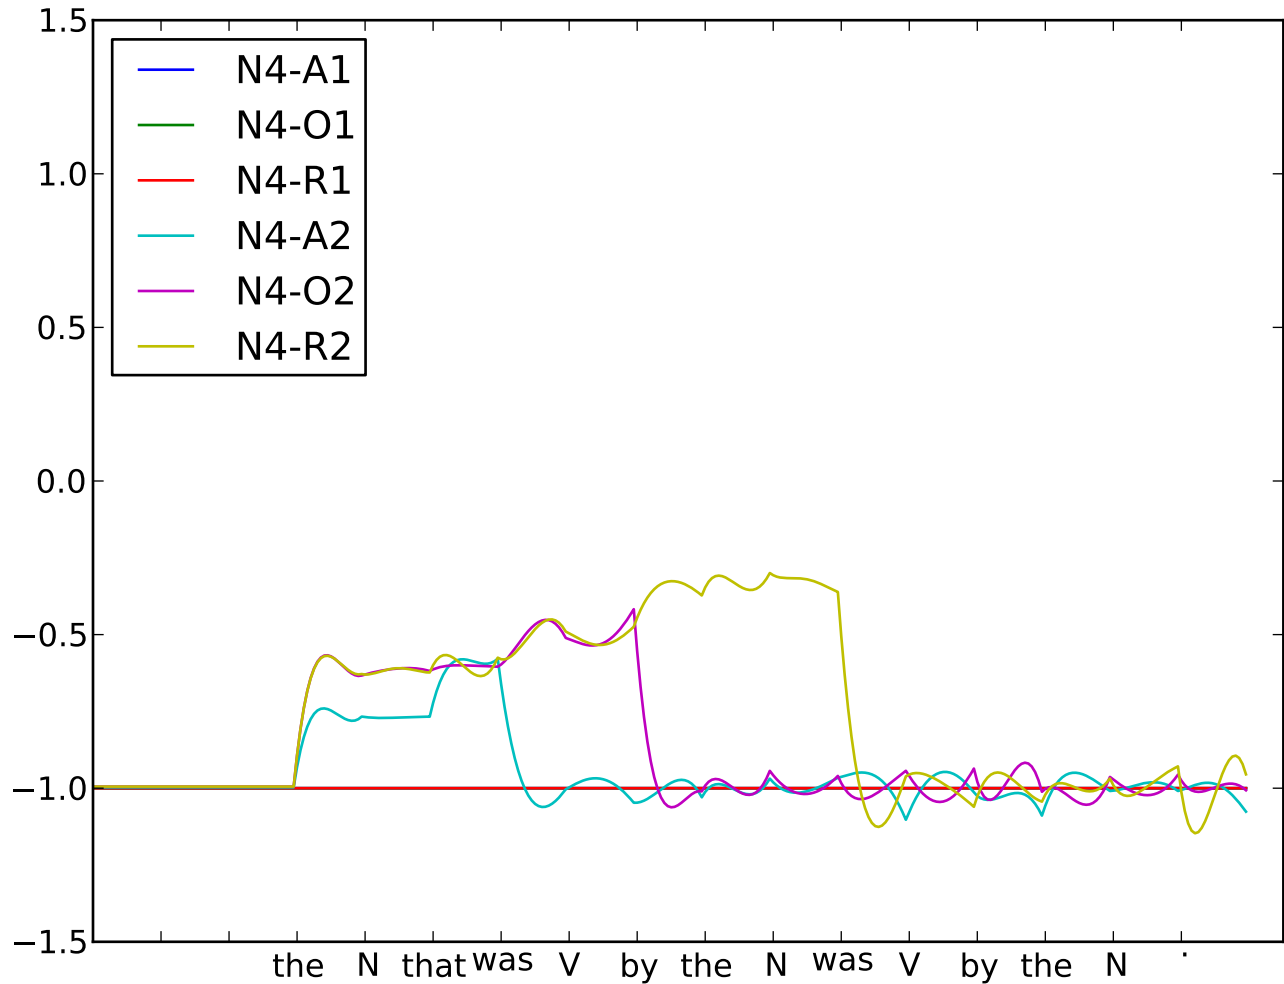





Sentence 27: 'the N V the N that was V by the N .'

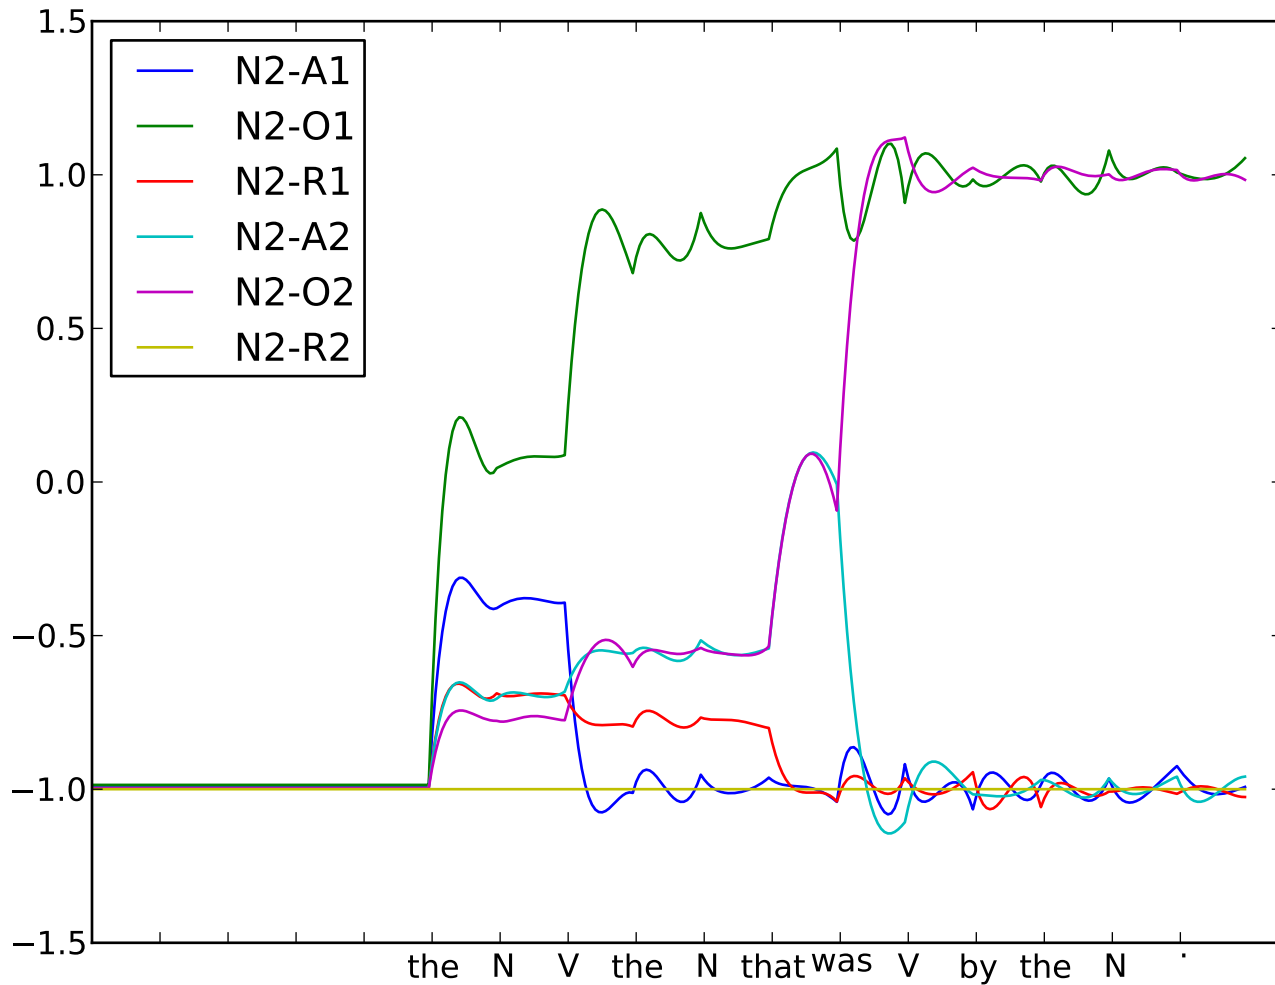

Sentence 27: 'the N V the N that was V by the N .'

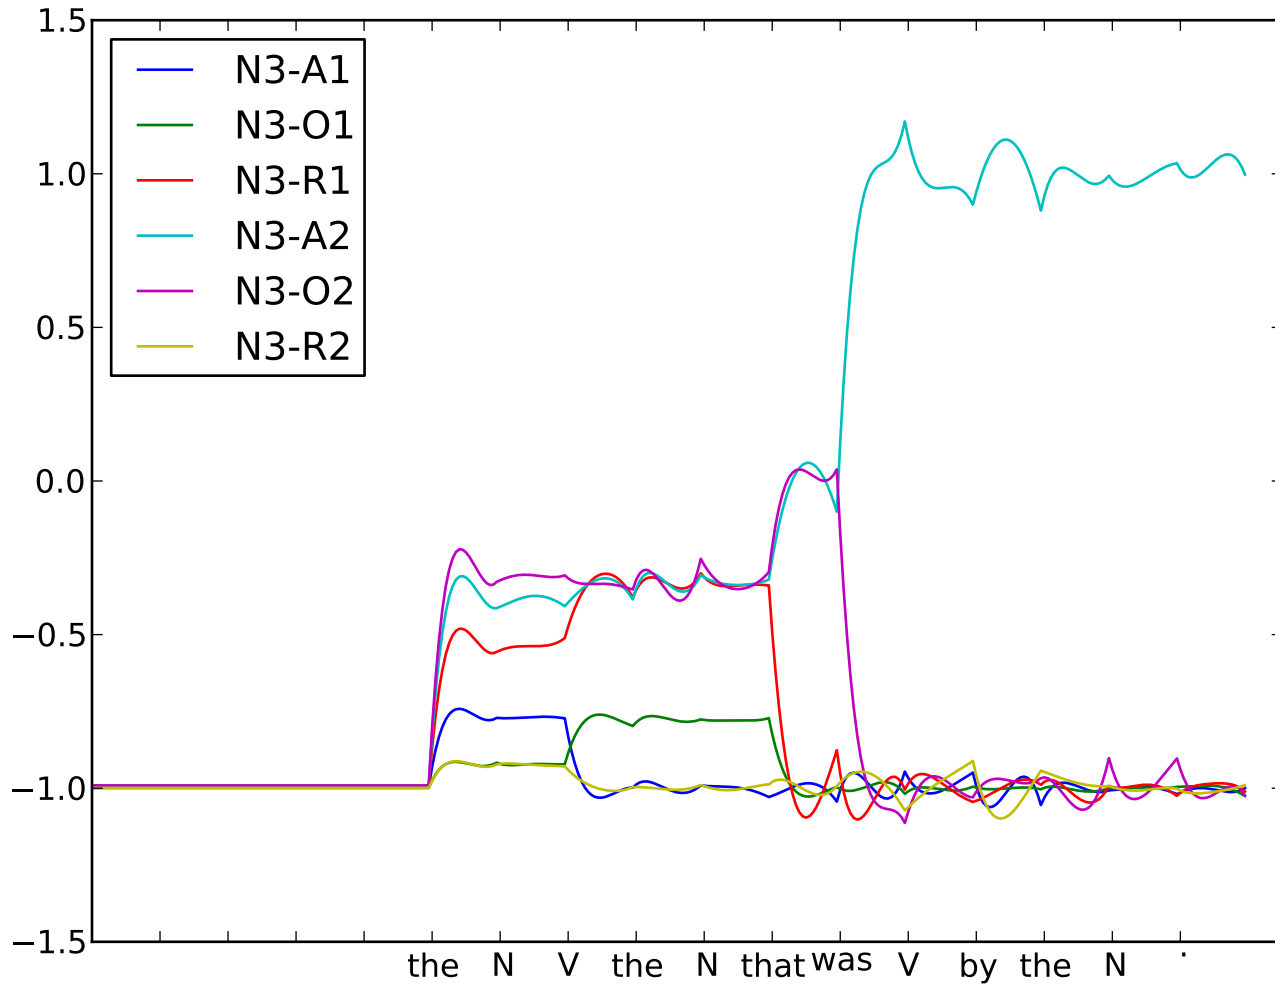

Sentence 27: 'the N V the N that was V by the N .'

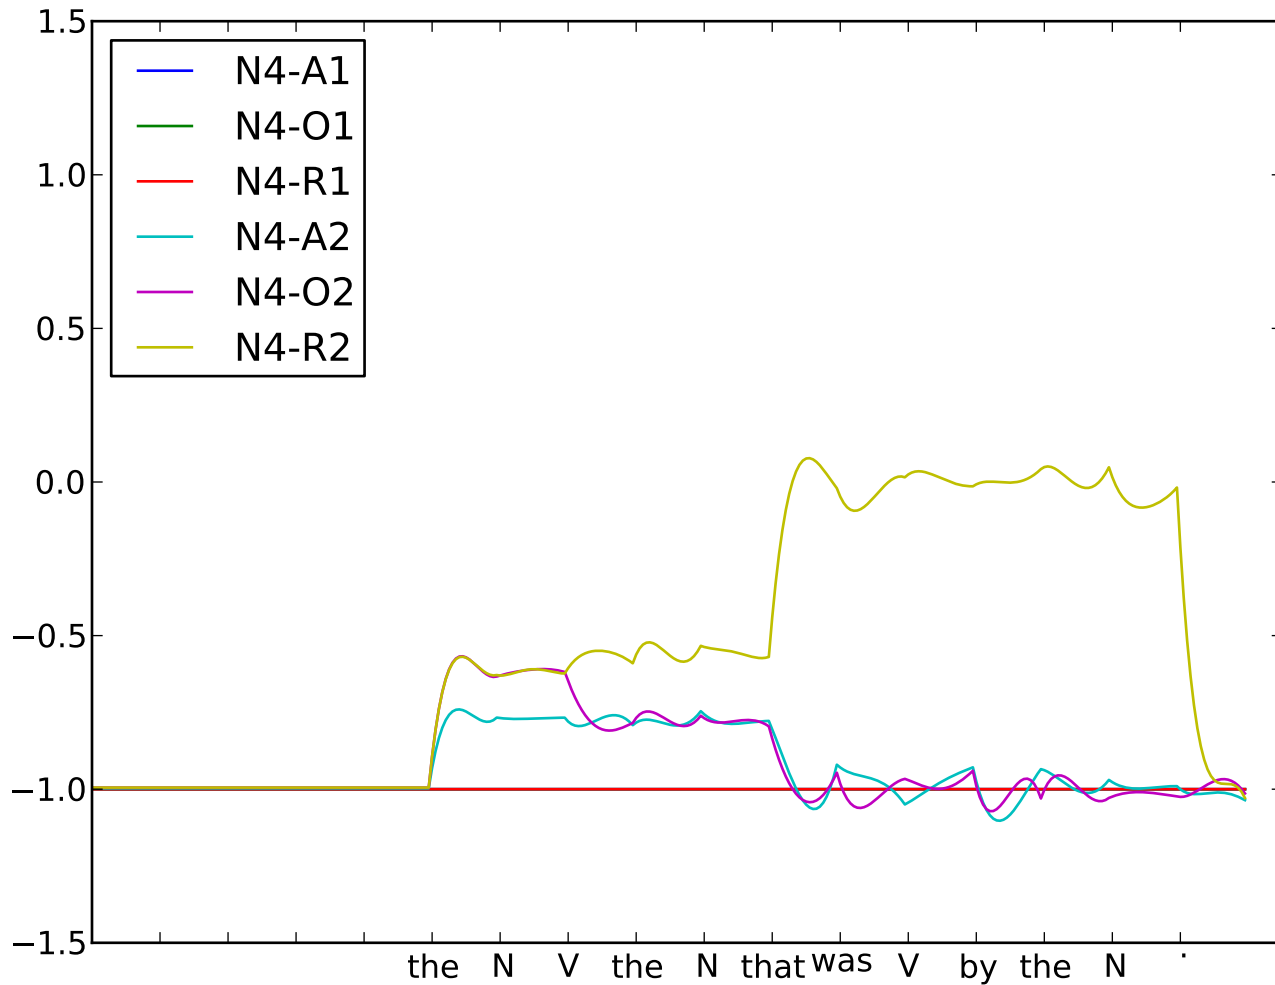

Sentence 28: 'the N was V to the N by the N that V the N .'

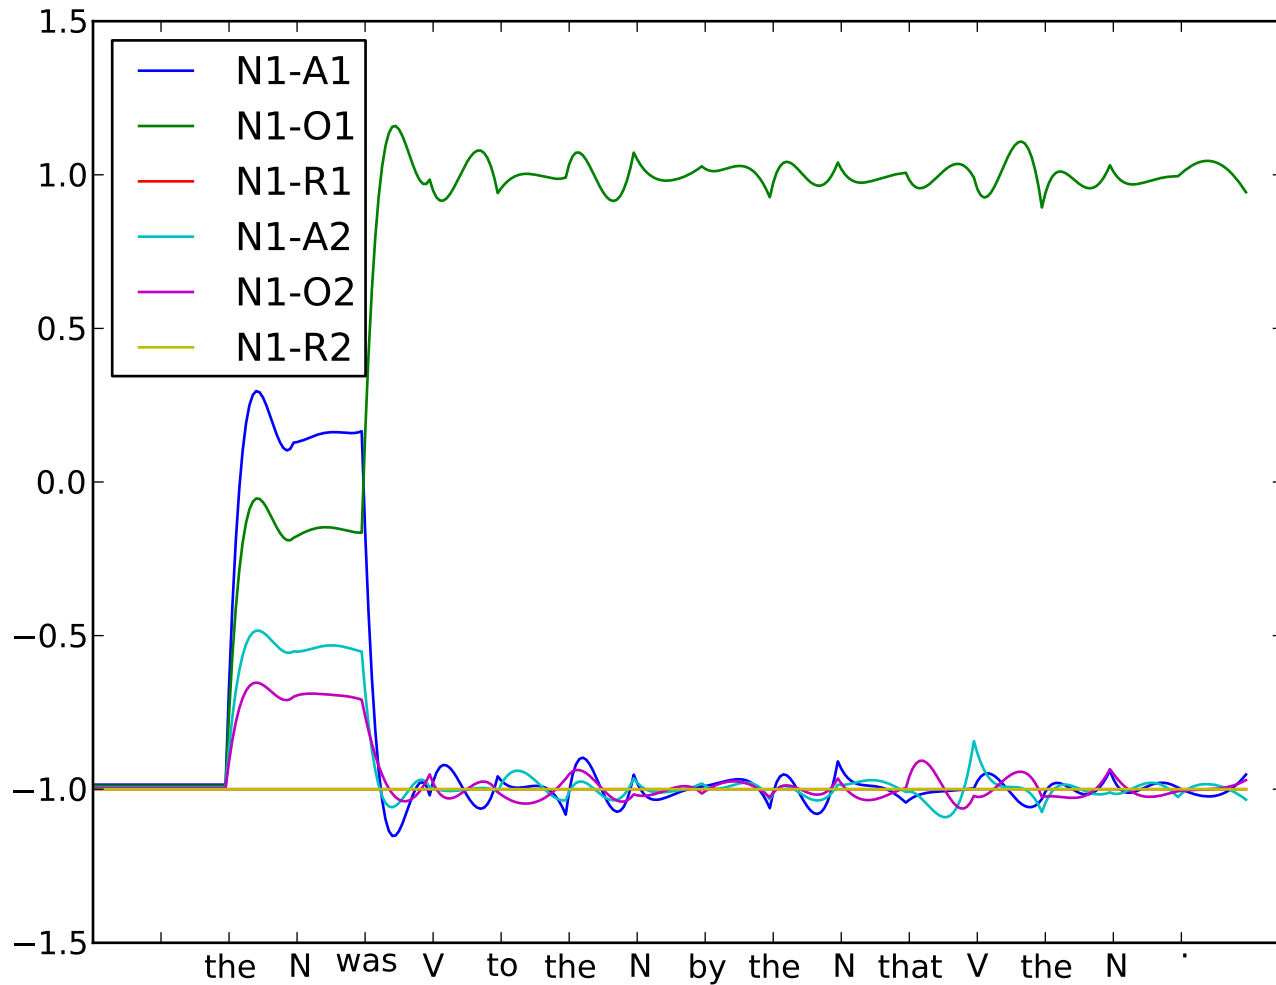

Sentence 28: 'the N was V to the N by the N that V the N .'

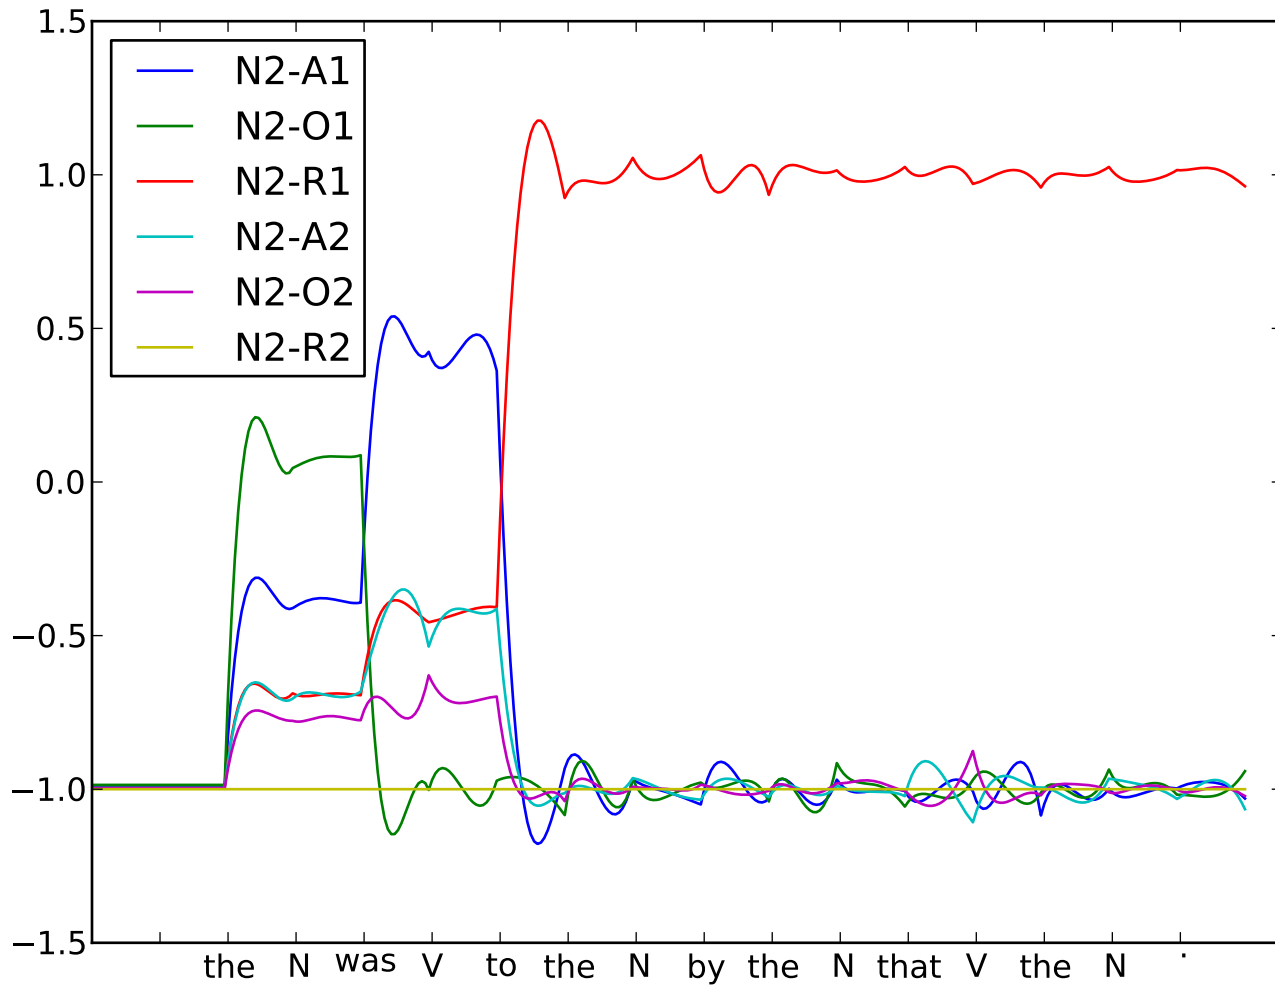

Sentence 28: 'the N was V to the N by the N that V the N .'

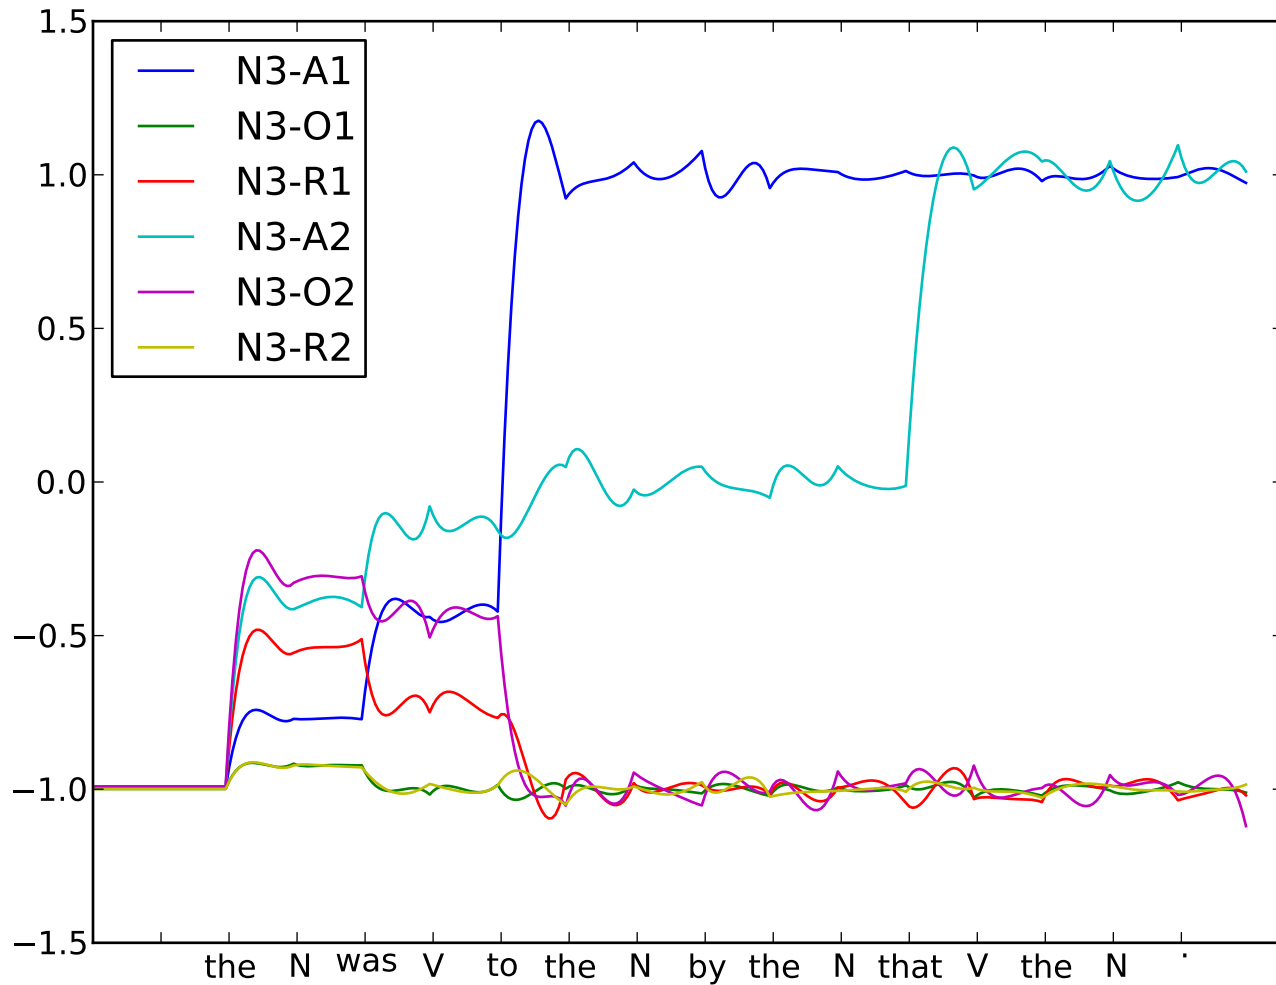

Sentence 28: 'the N was V to the N by the N that V the N .'

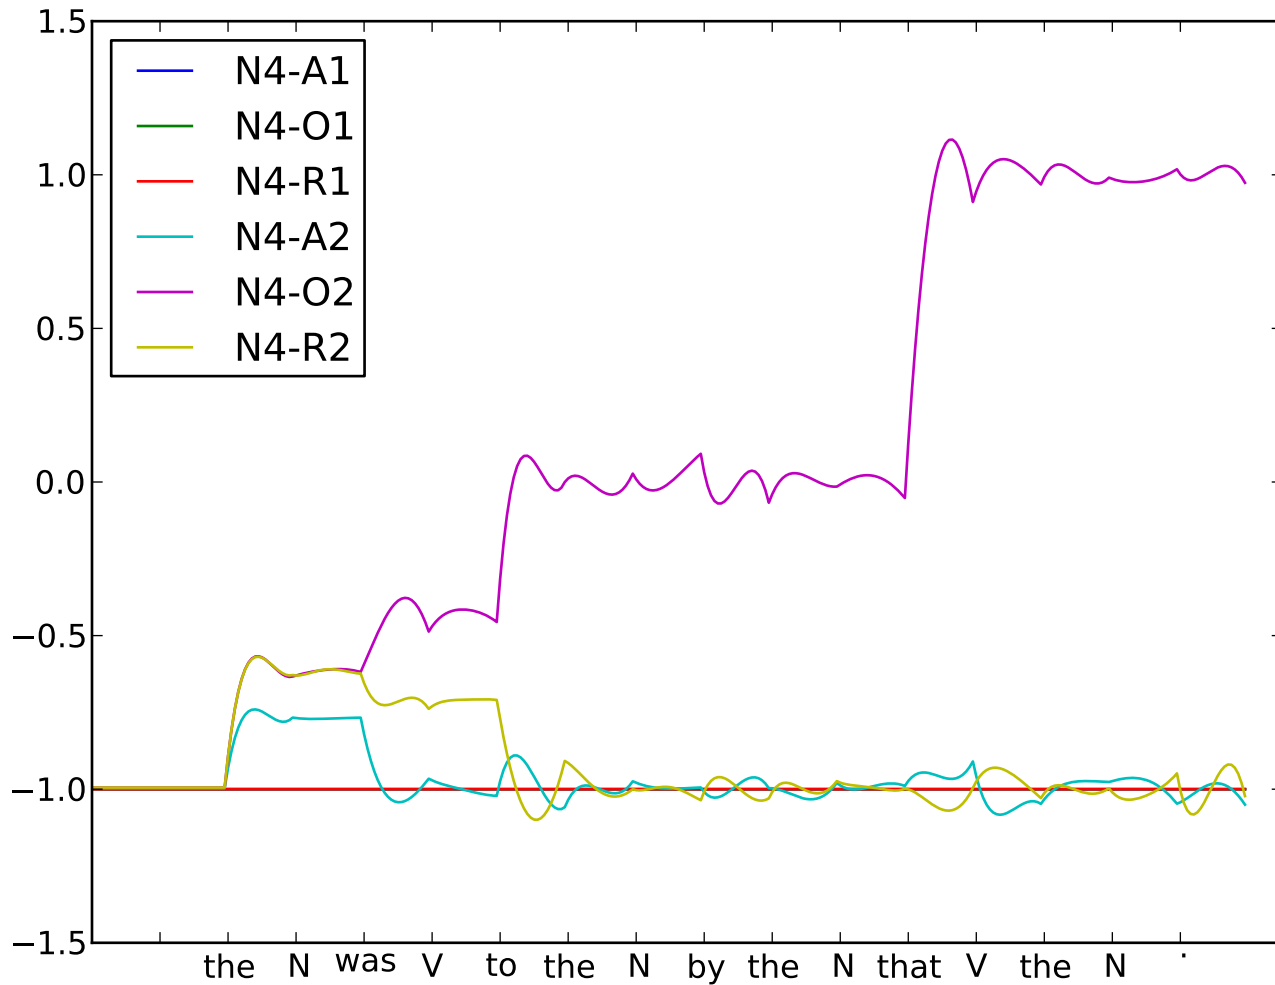



Sentence 29: 'the N that V the N was V to the N by the N .'

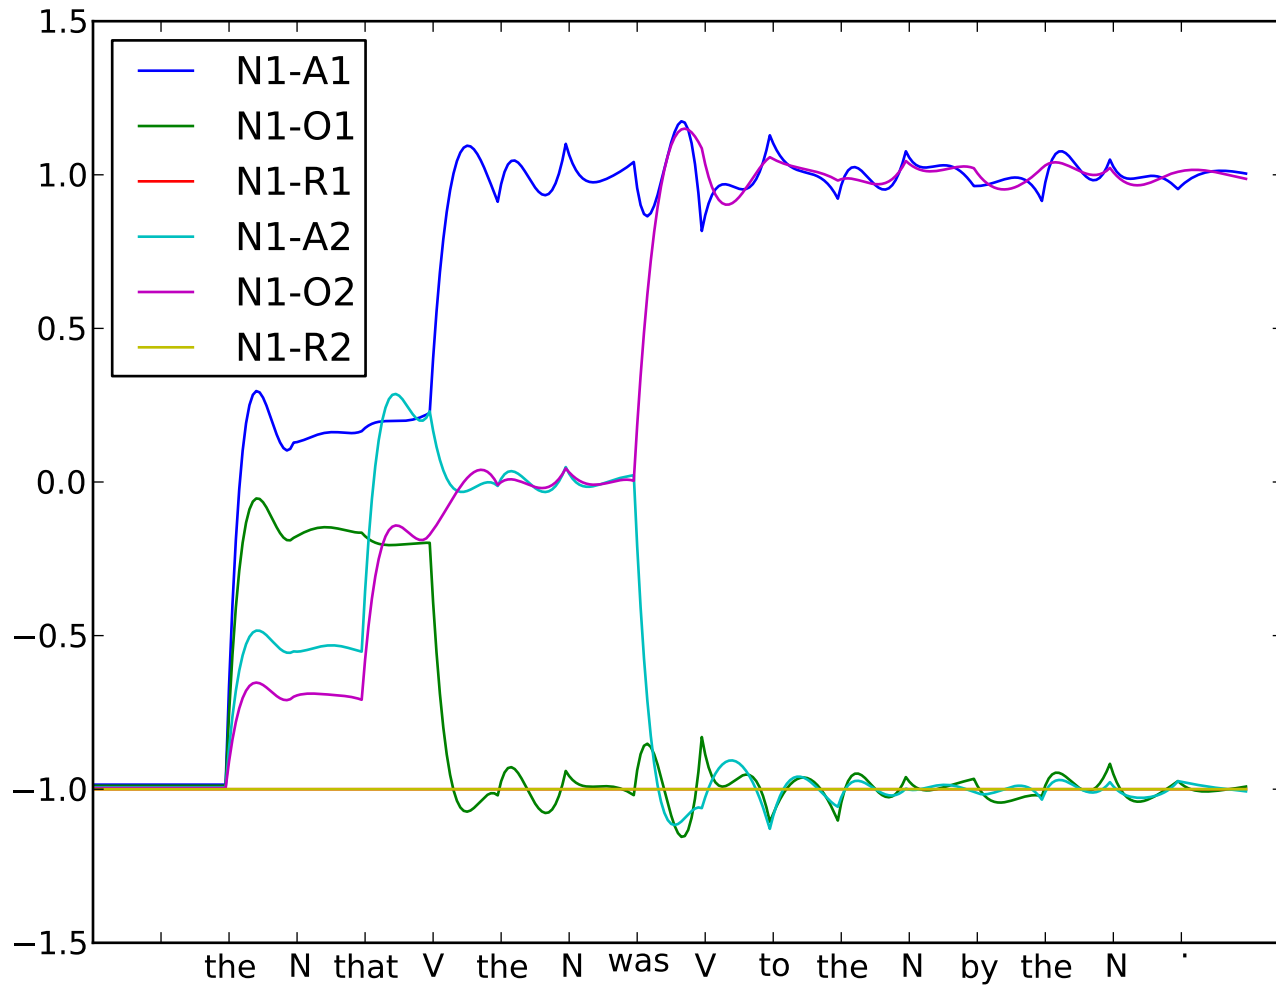

Sentence 29: 'the N that V the N was V to the N by the N .'

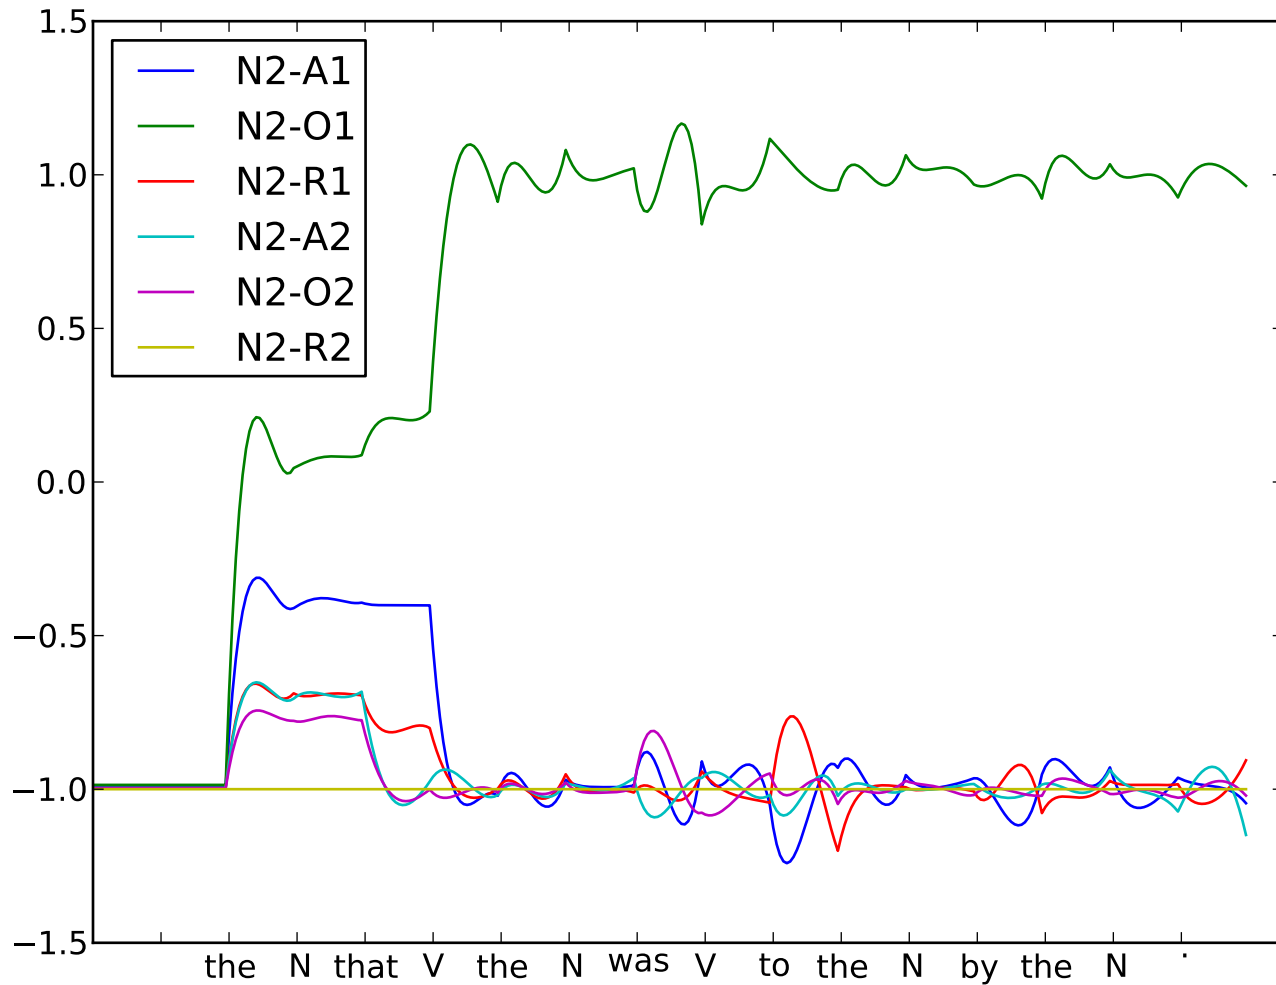

Sentence 29: 'the N that V the N was V to the N by the N .'

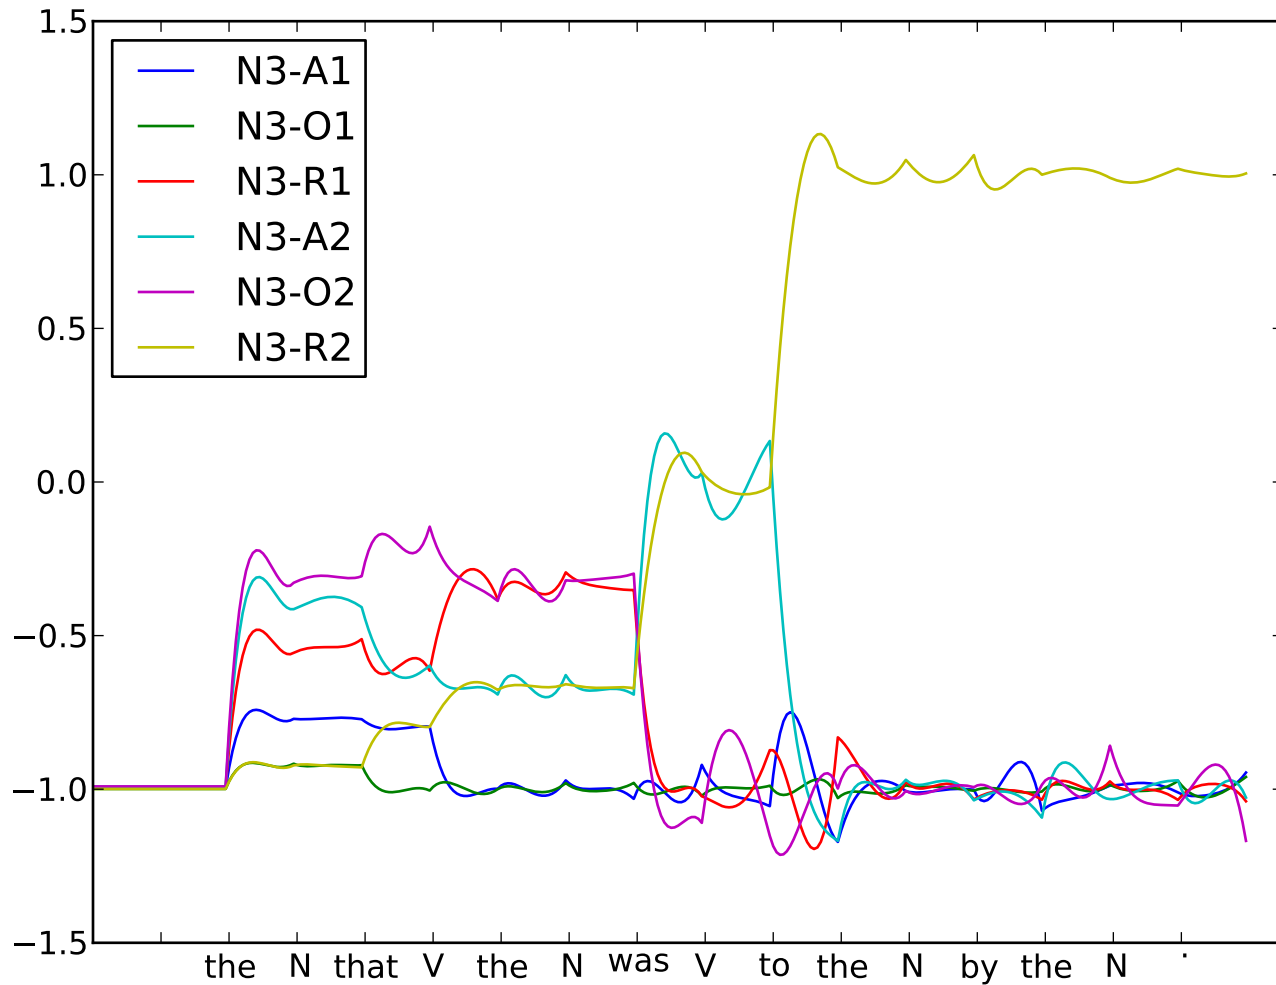

Sentence 29: 'the N that V the N was V to the N by the N .'

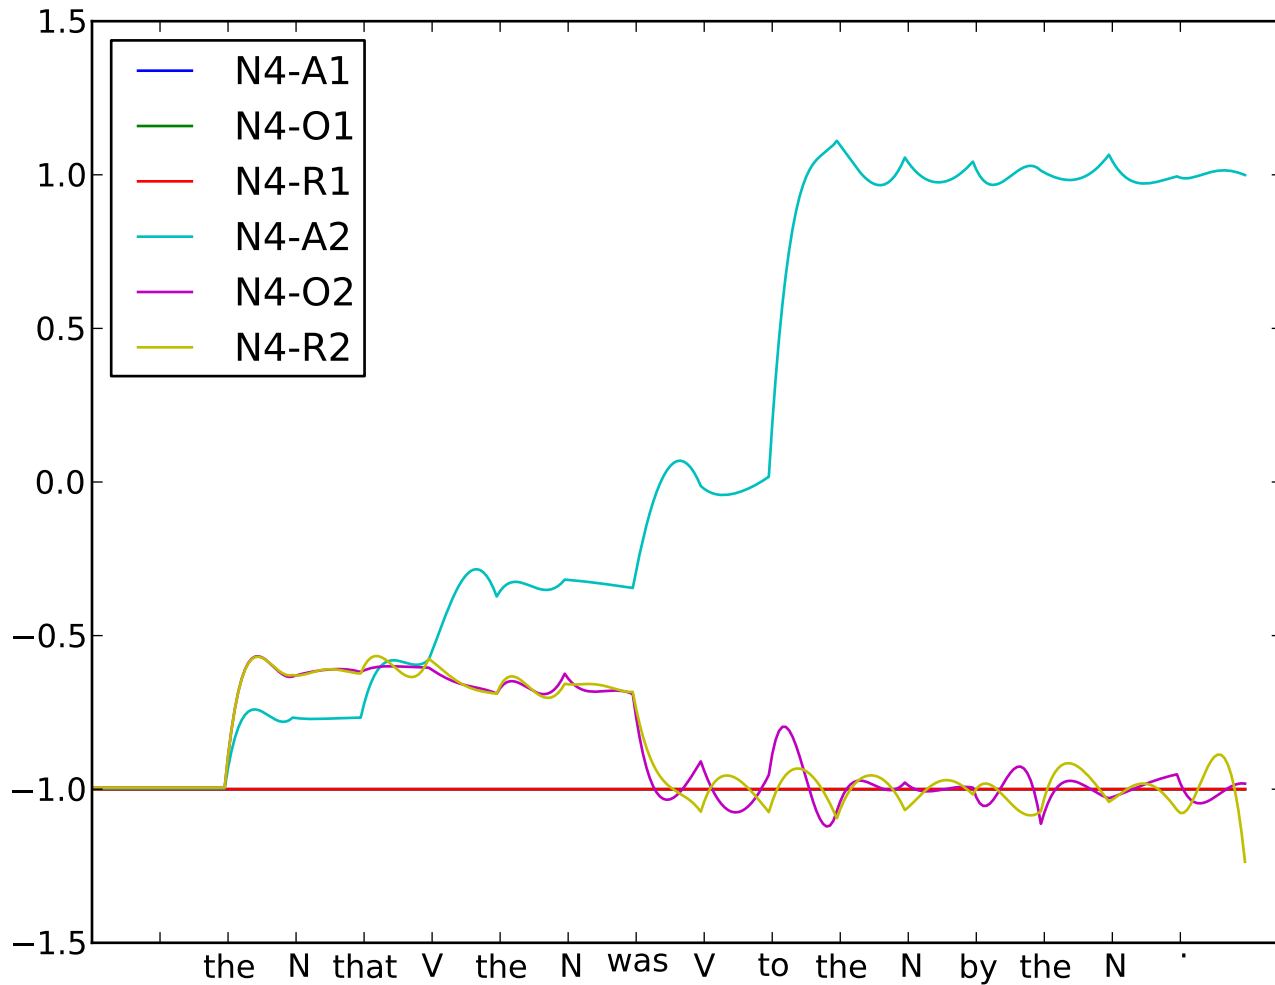

Sentence 30: 'the N V the N to the N that V the N .'

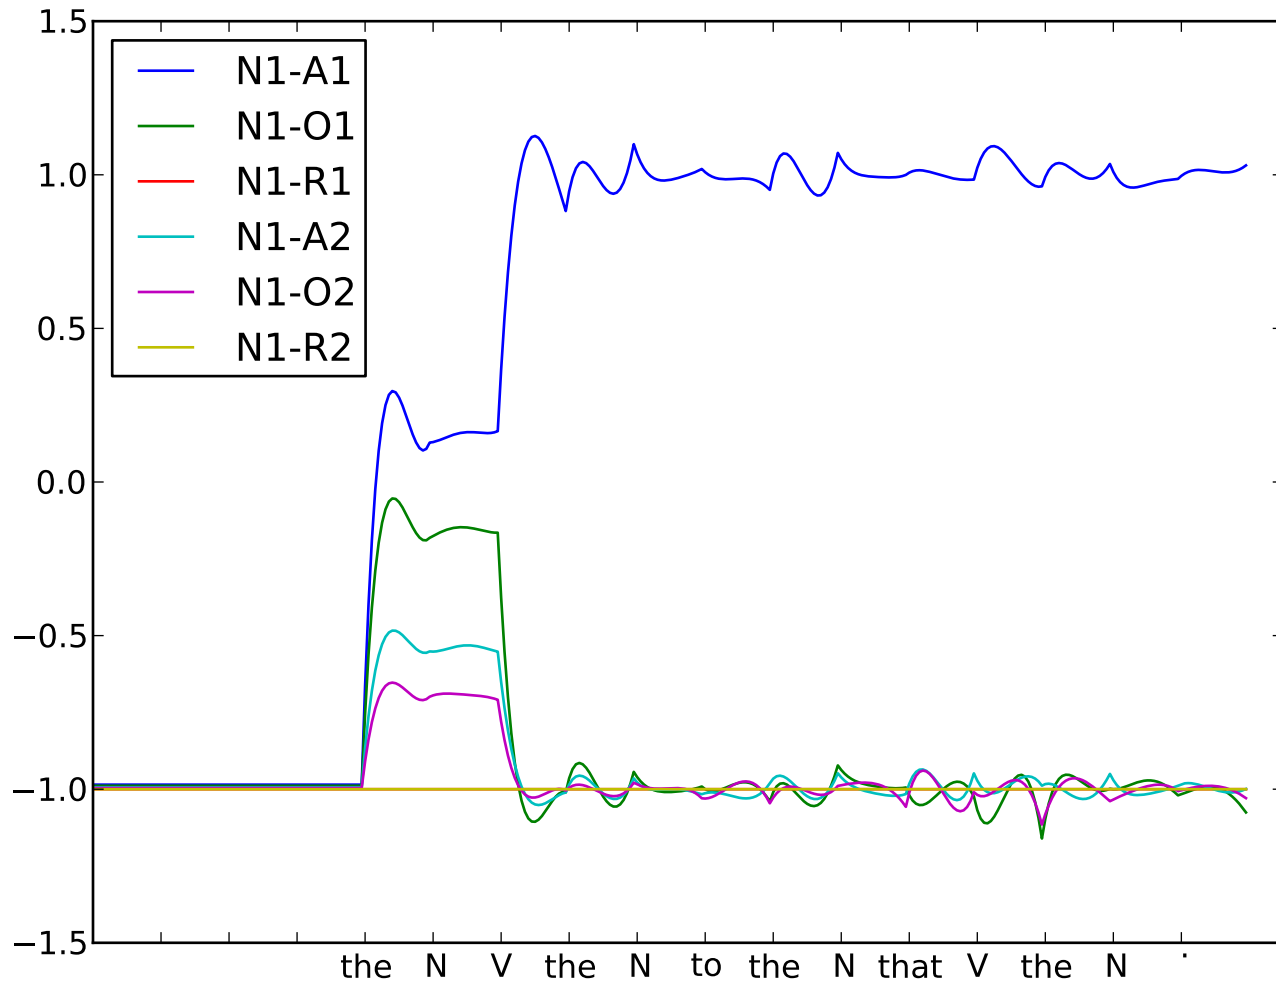

Sentence 30: 'the N V the N to the N that V the N .'

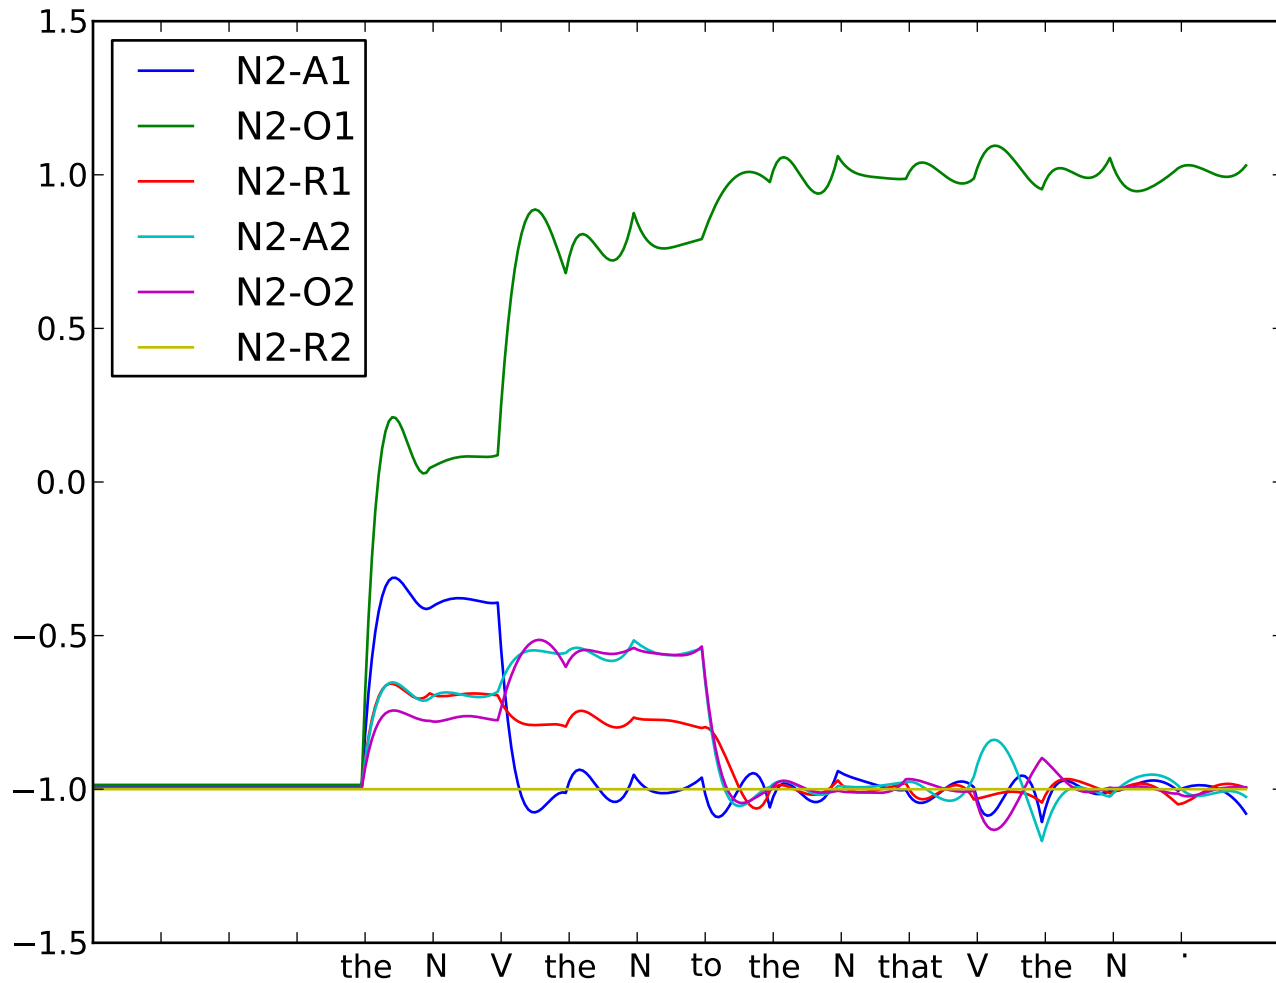

Sentence 30: 'the N V the N to the N that V the N .'

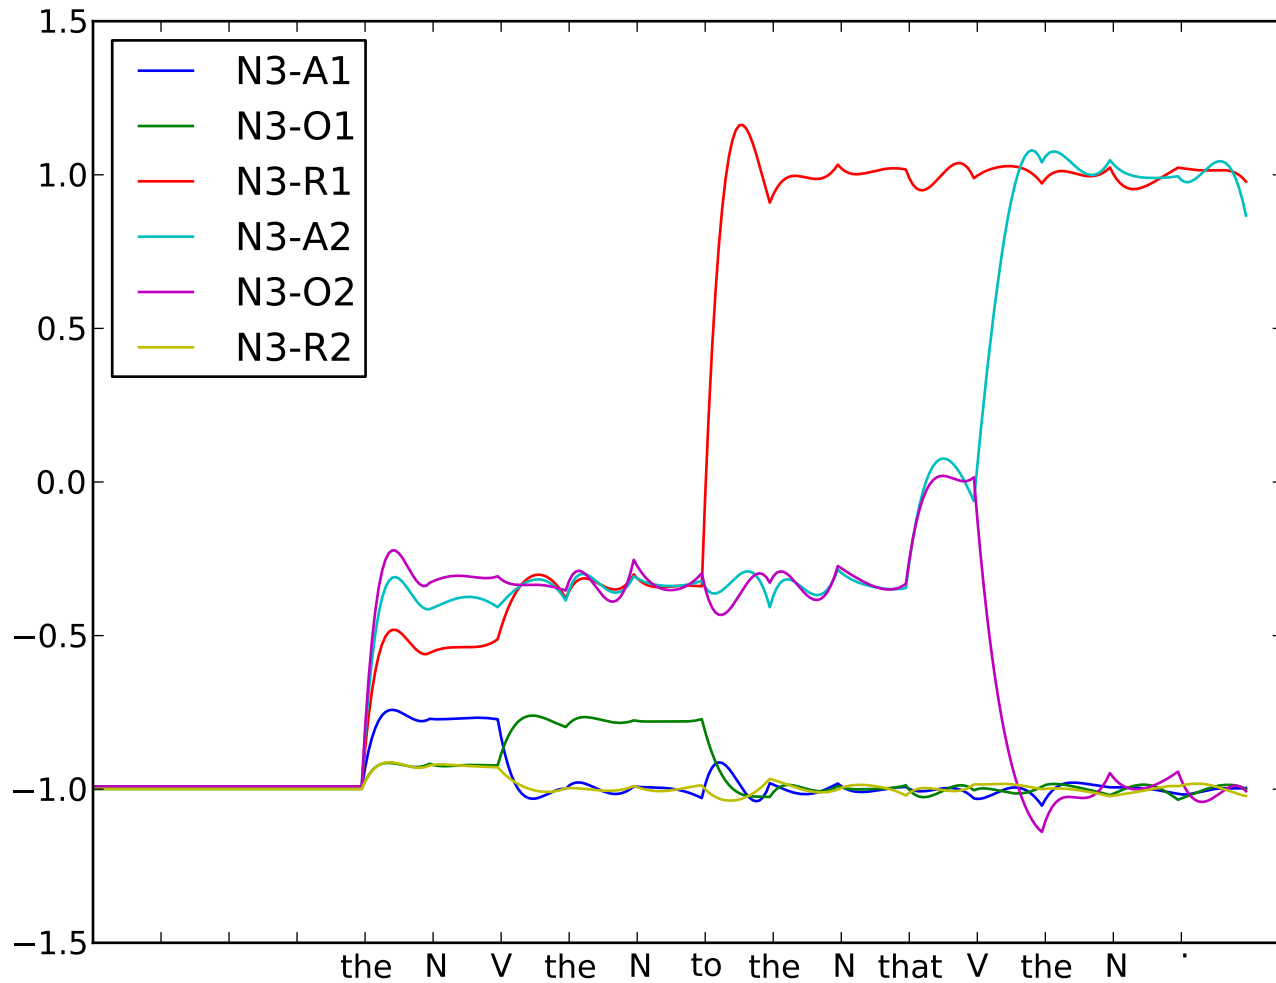

Sentence 30: 'the N V the N to the N that V the N .'

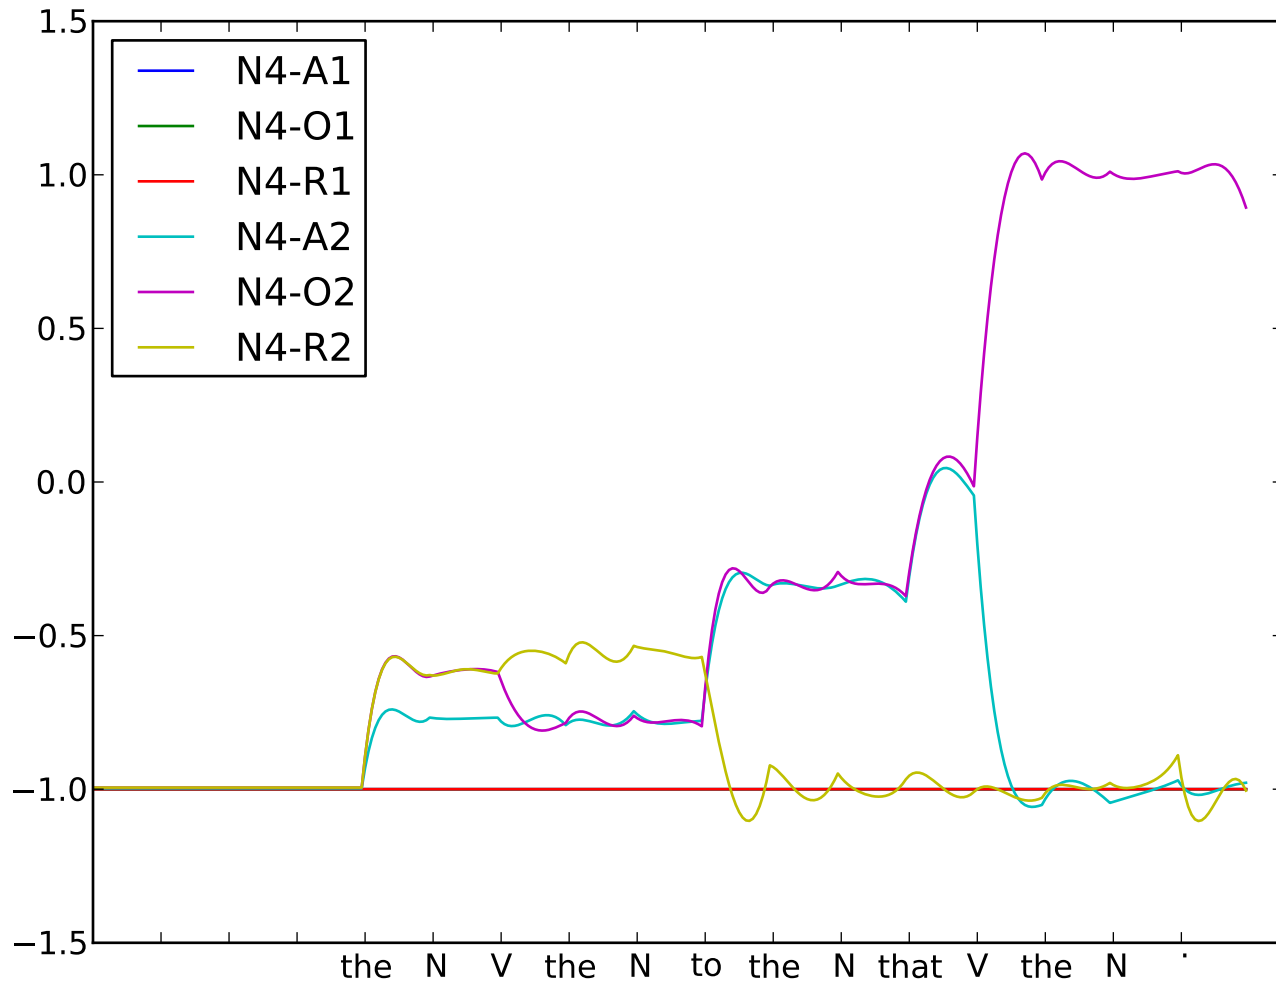



Sentence 31: 'the N was V from the N to the N that V the N .'

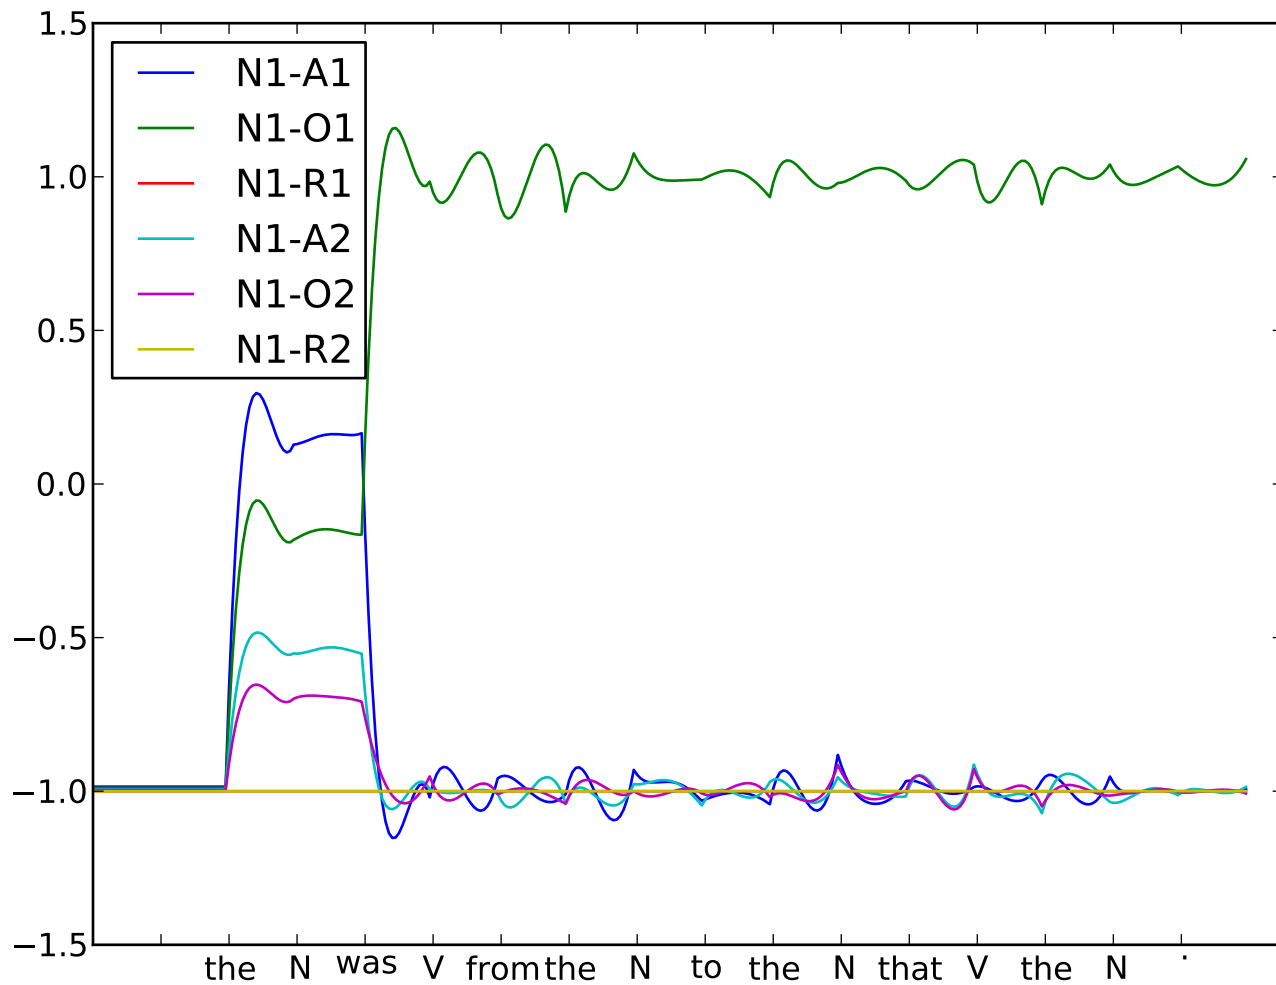

Sentence 31: 'the N was V from the N to the N that V the N .'

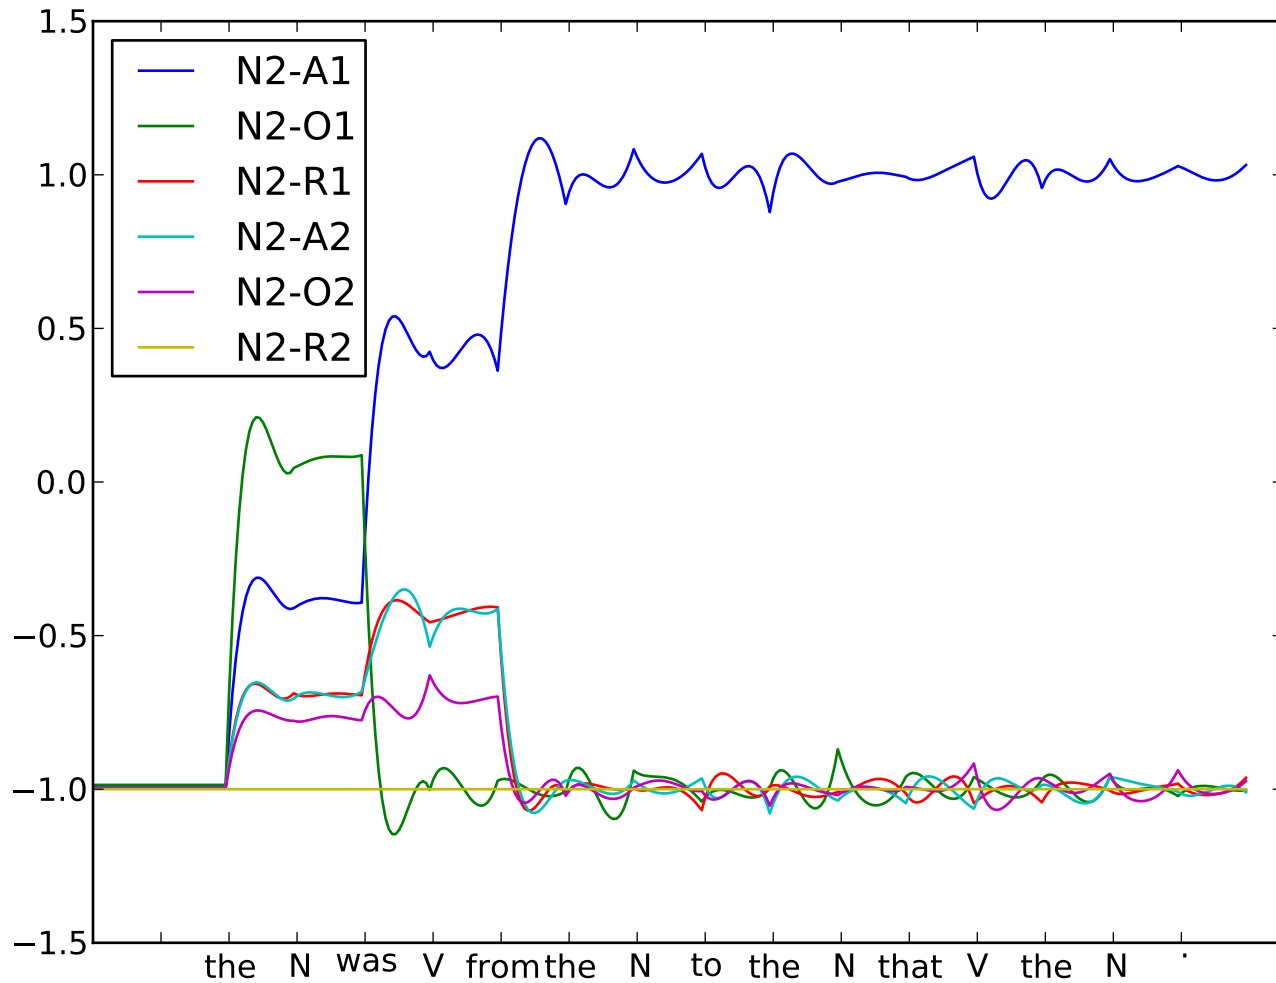

Sentence 31: 'the N was V from the N to the N that V the N .'

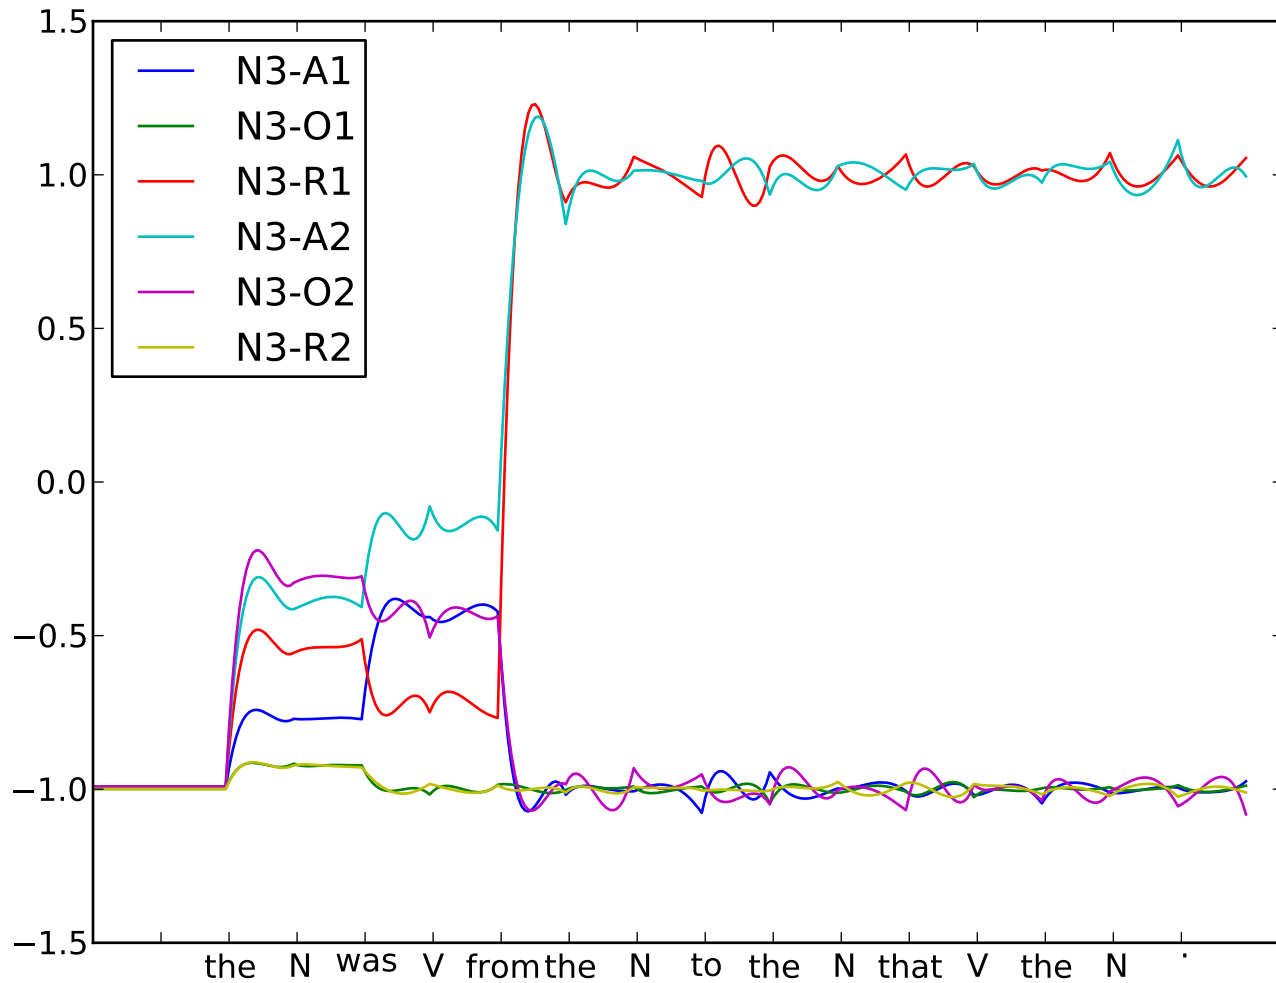

Sentence 31: 'the N was V from the N to the N that V the N .'

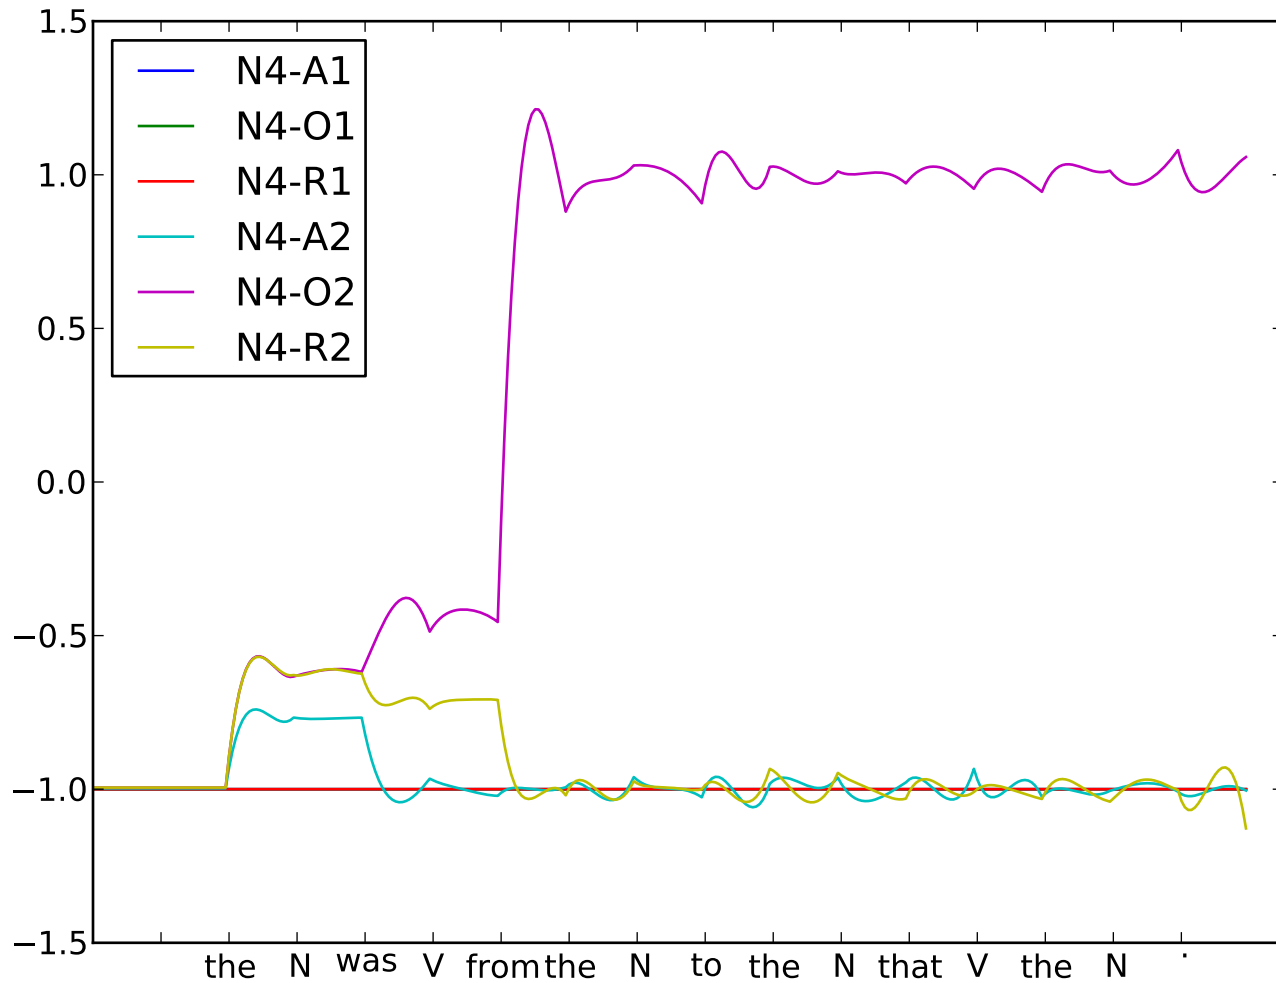

Sentence 32: 'the N that was V by the N V the N to the N .'

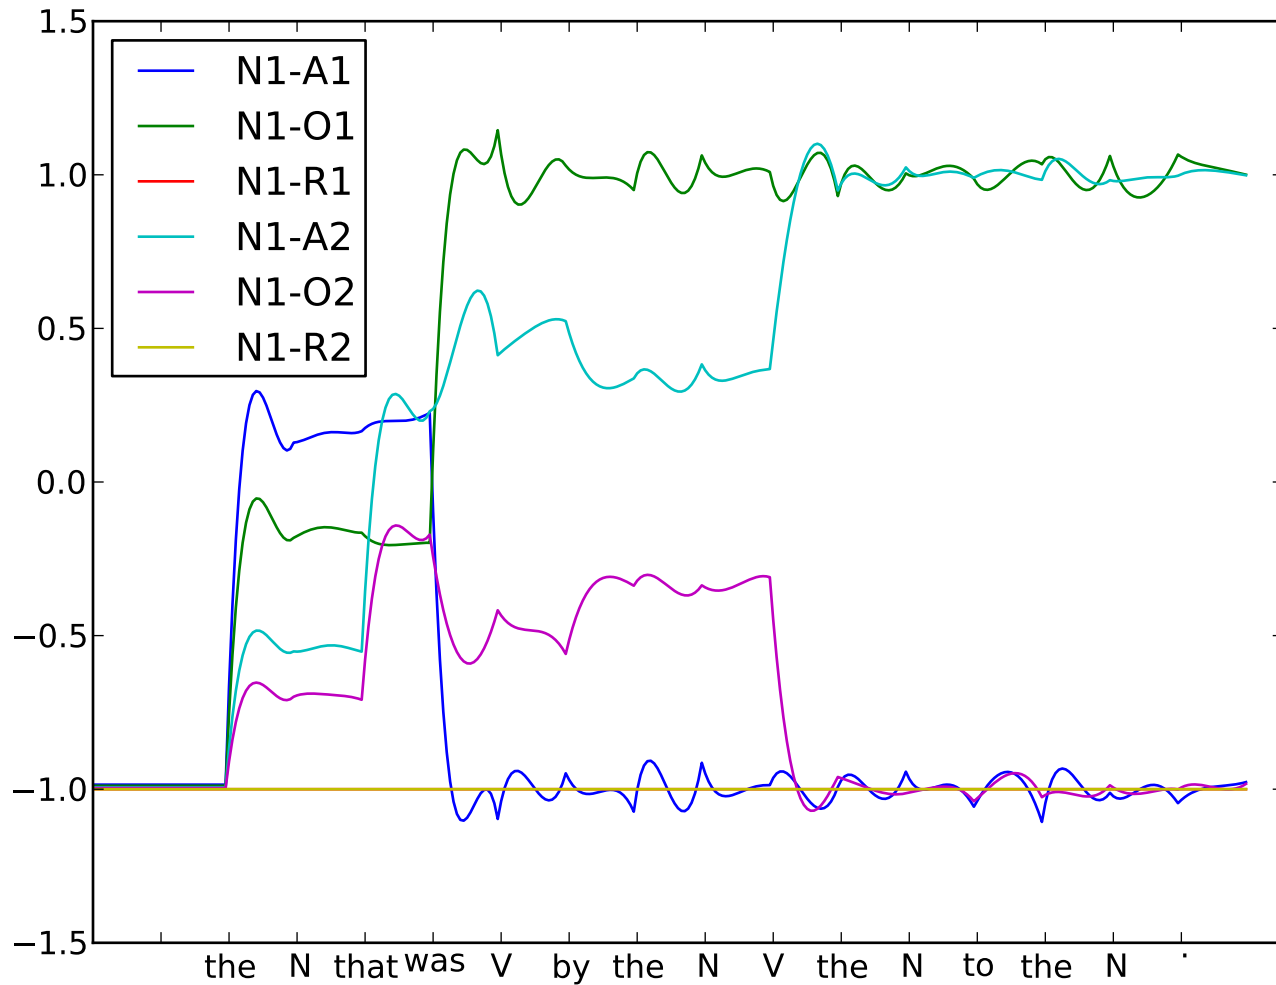

Sentence 32: 'the N that was V by the N V the N to the N .'

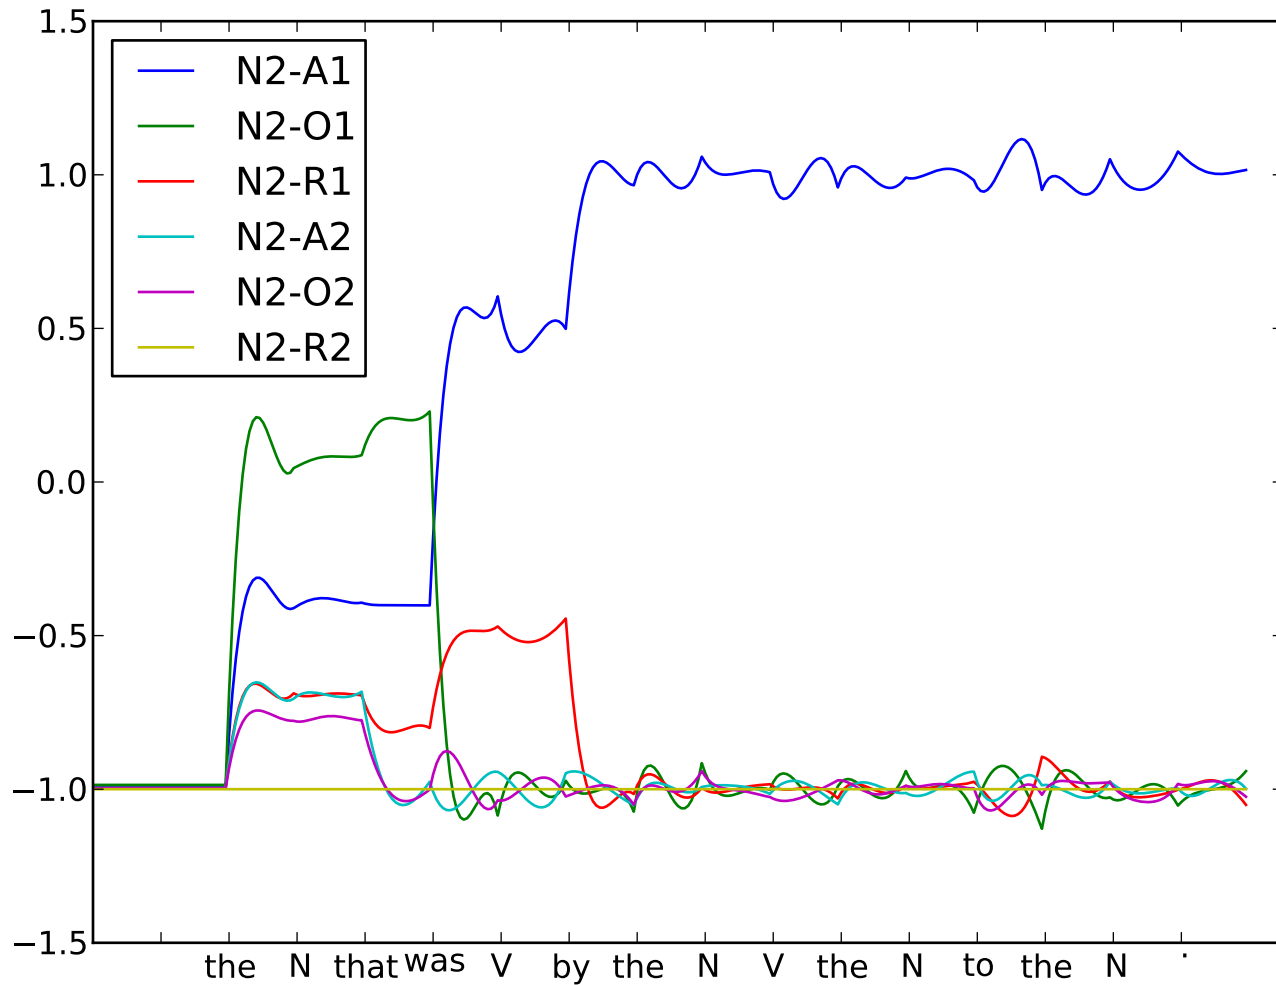

Sentence 32: 'the N that was V by the N V the N to the N .'

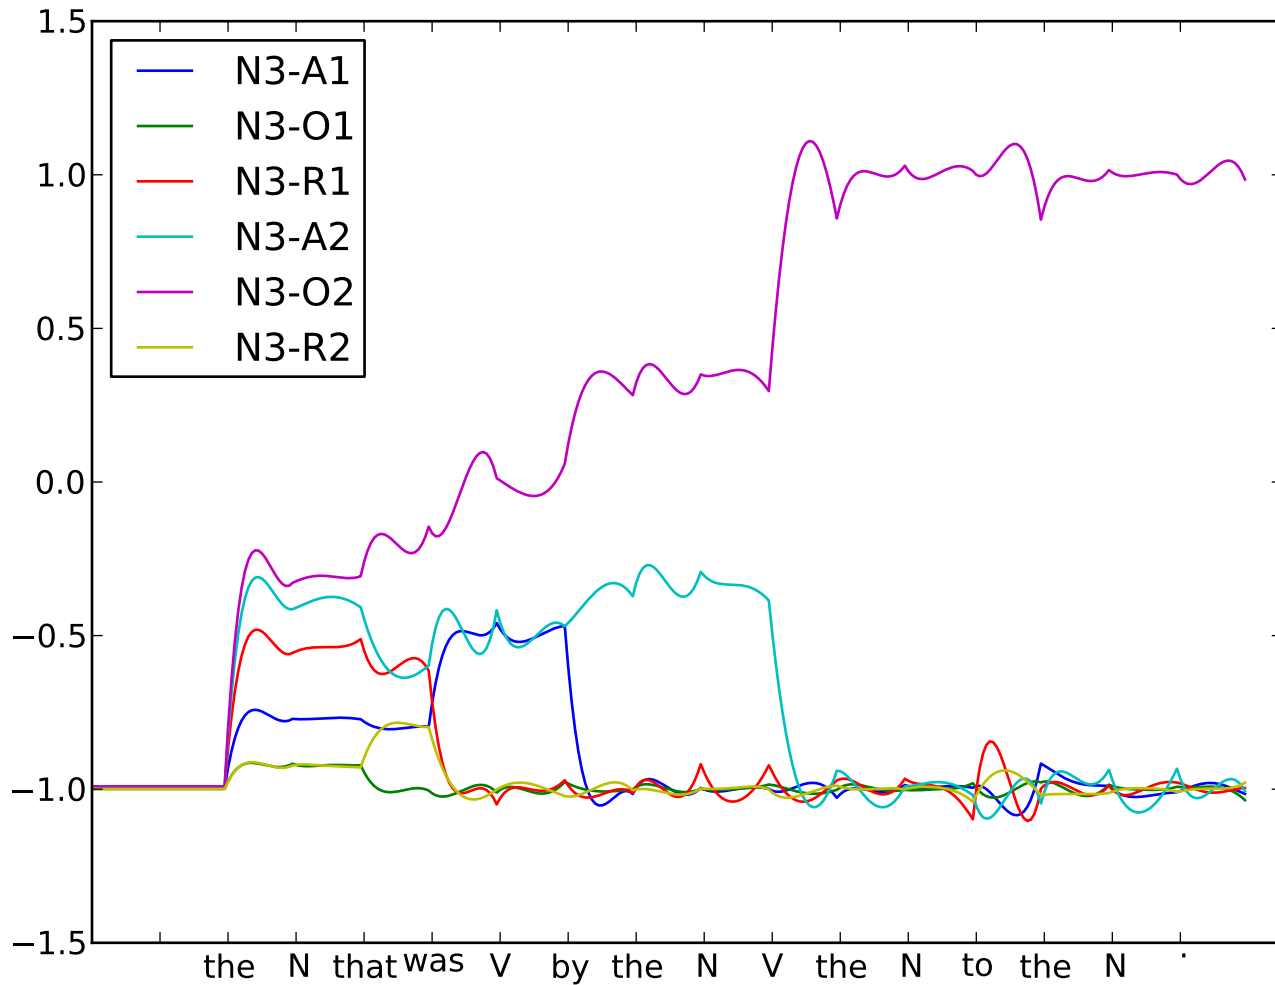

Sentence 32: 'the N that was V by the N V the N to the N . '

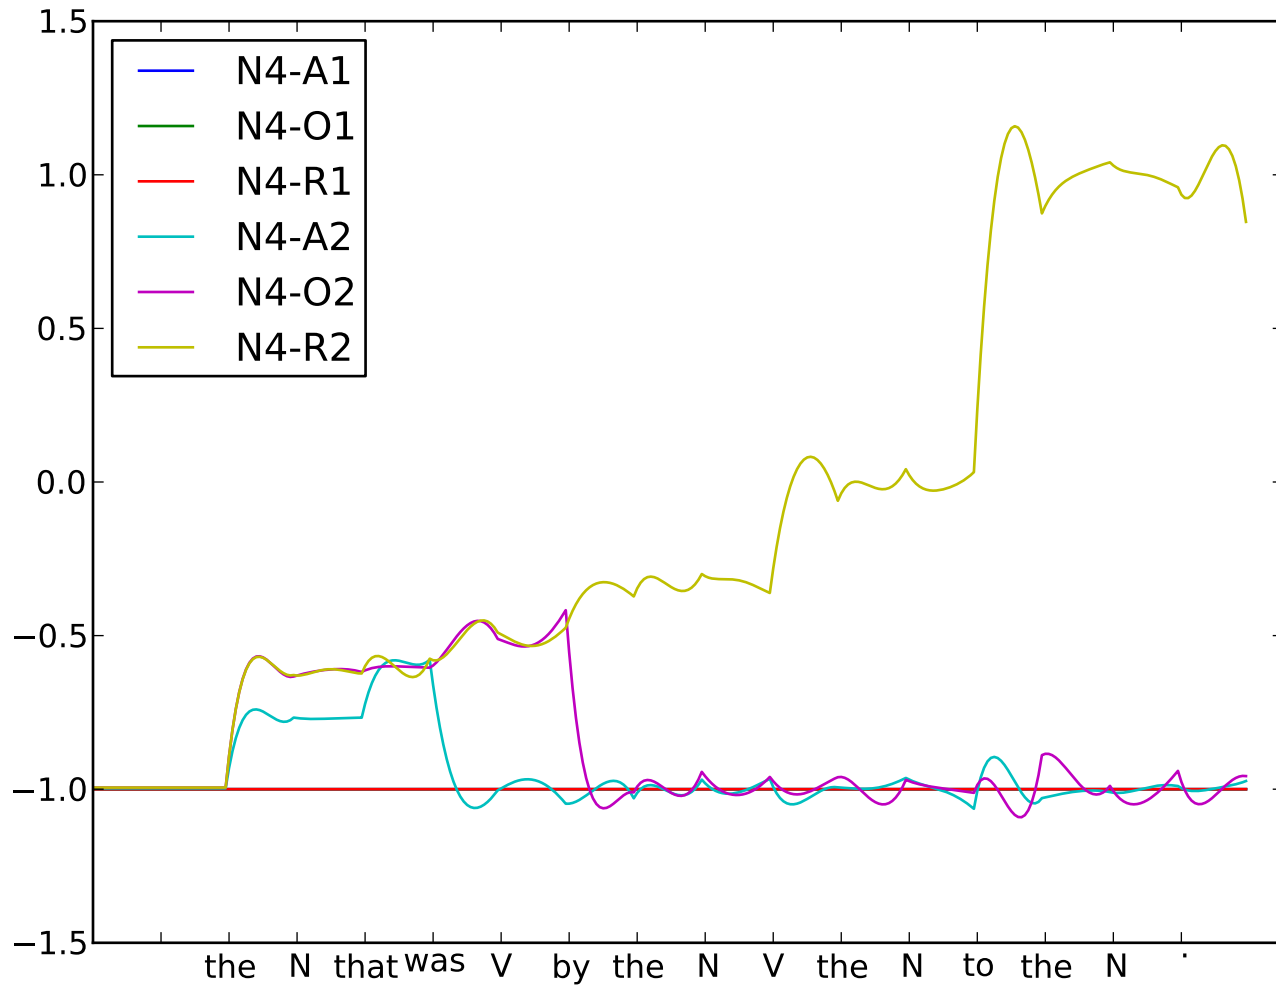



Sentence 33: 'the N V the N to the N that was V by the N .'

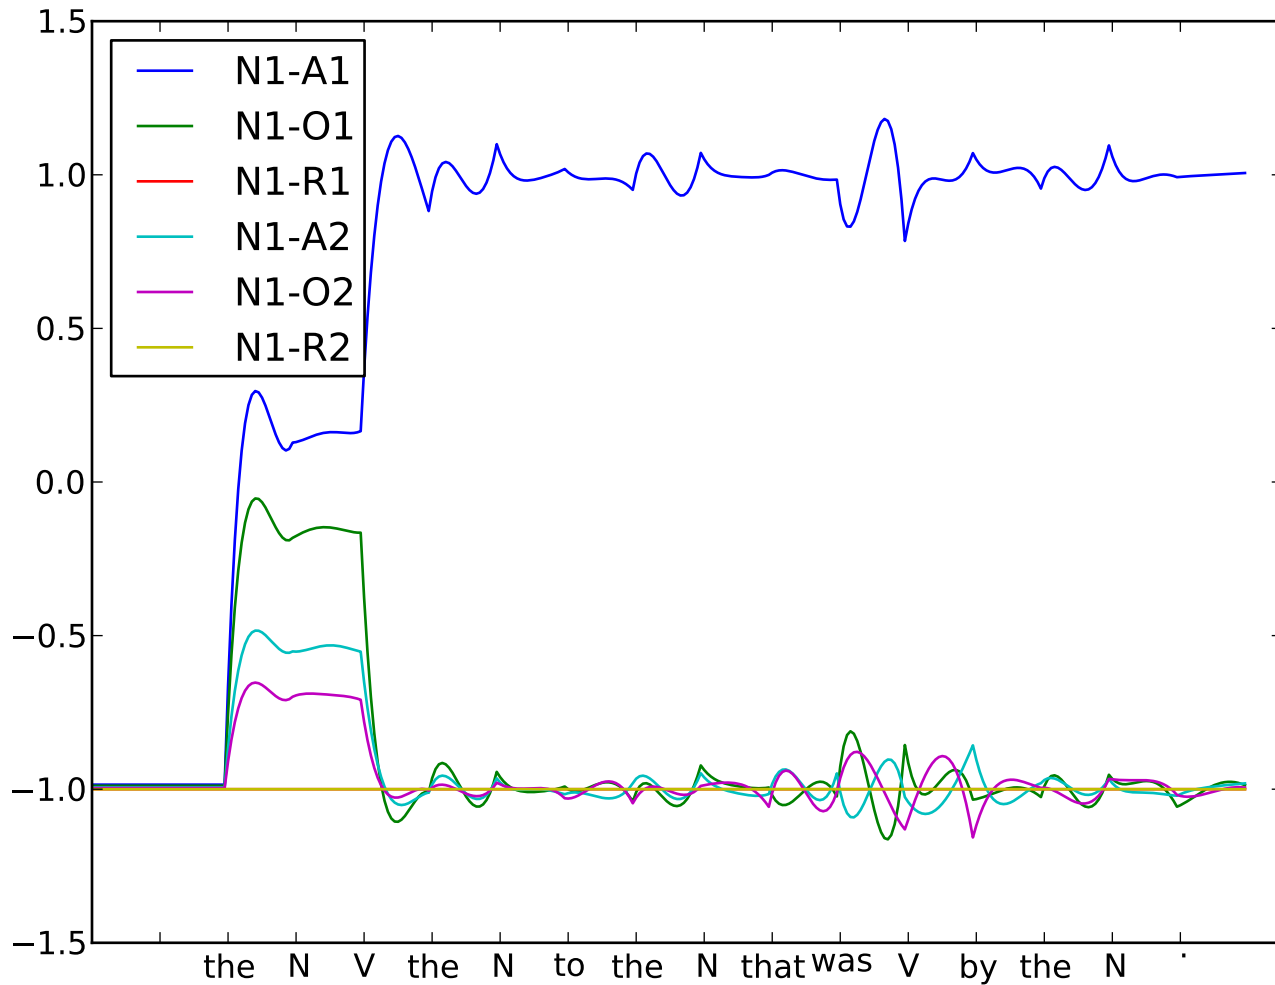

Sentence 33: 'the N V the N to the N that was V by the N .'

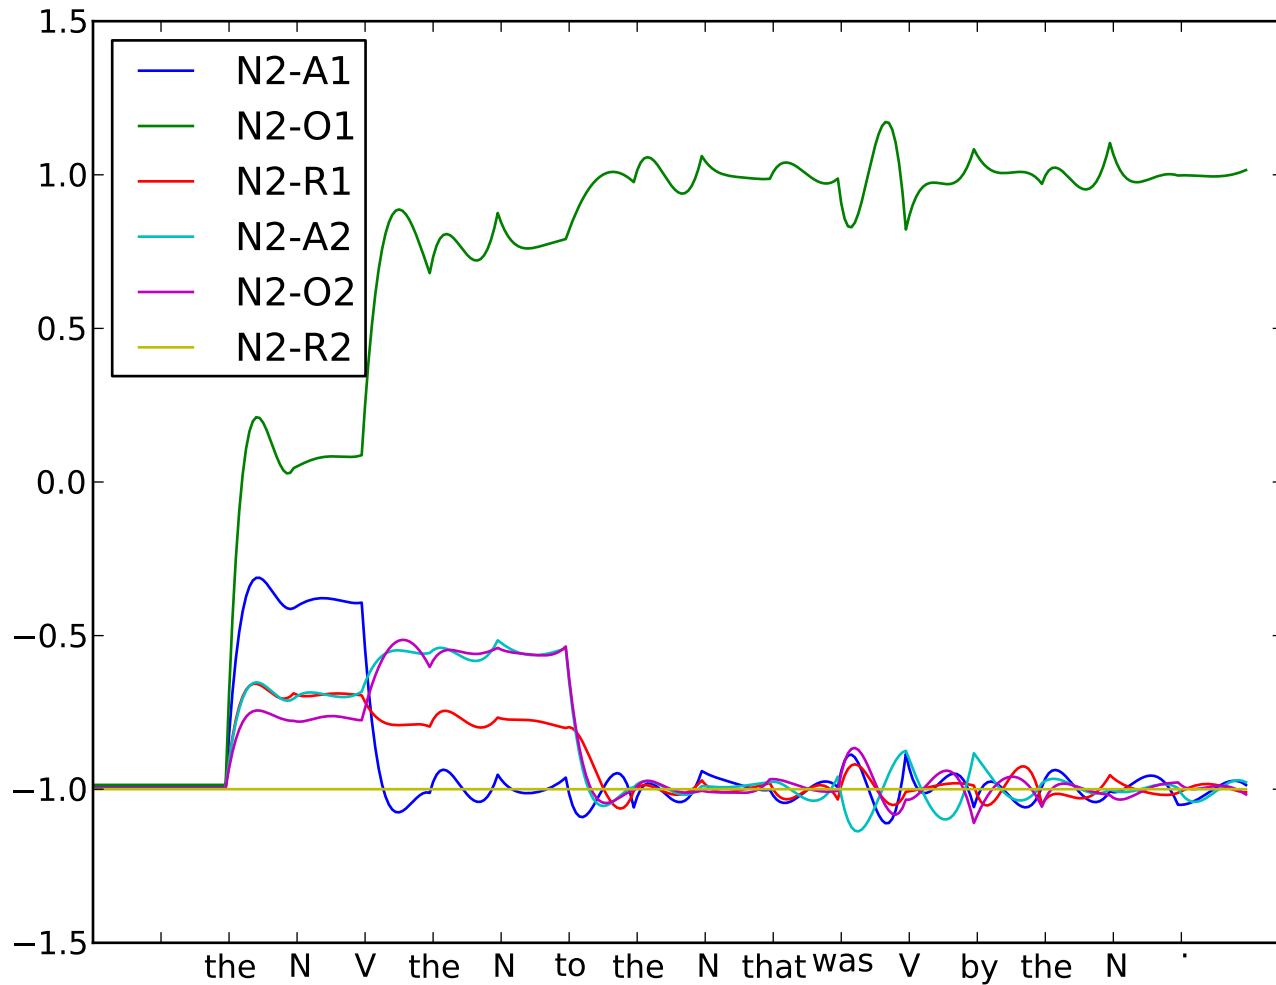

Sentence 33: 'the N V the N to the N that was V by the N .'

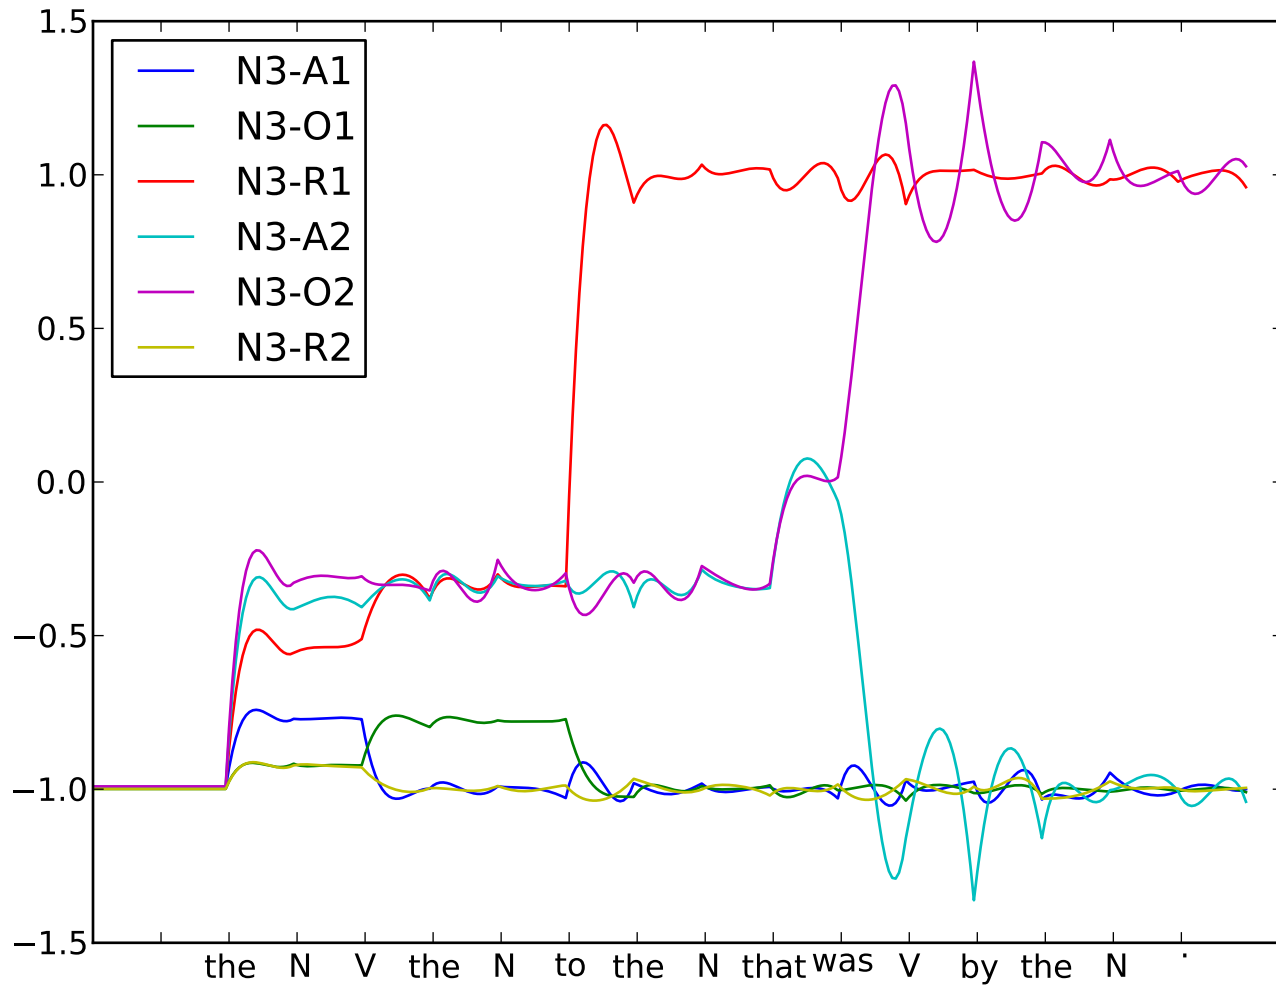

Sentence 33: 'the N V the N to the N that was V by the N .'

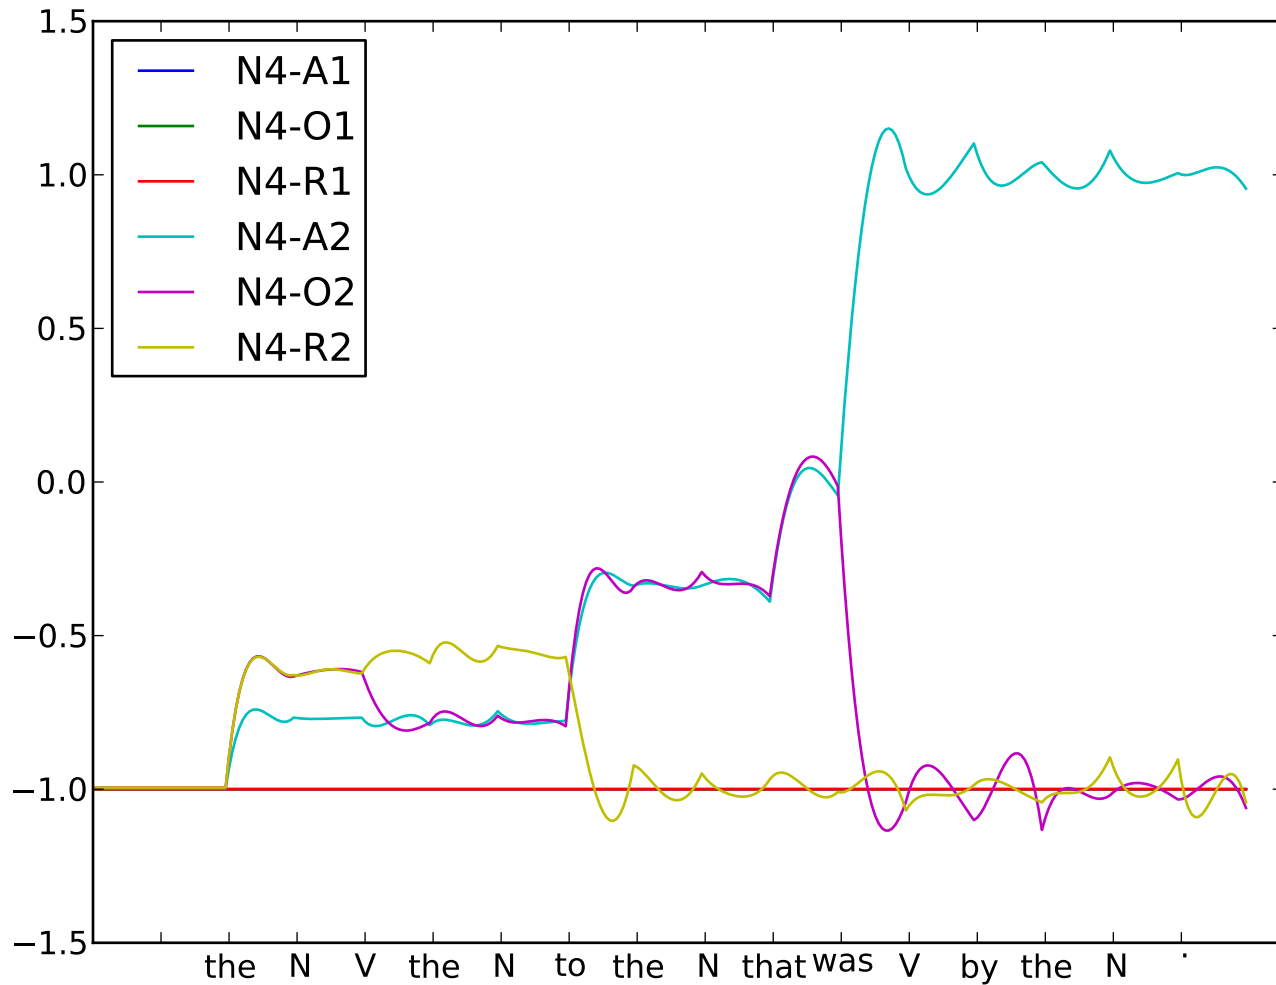

Sentence 34: 'the N that V the N to the N V the N .'

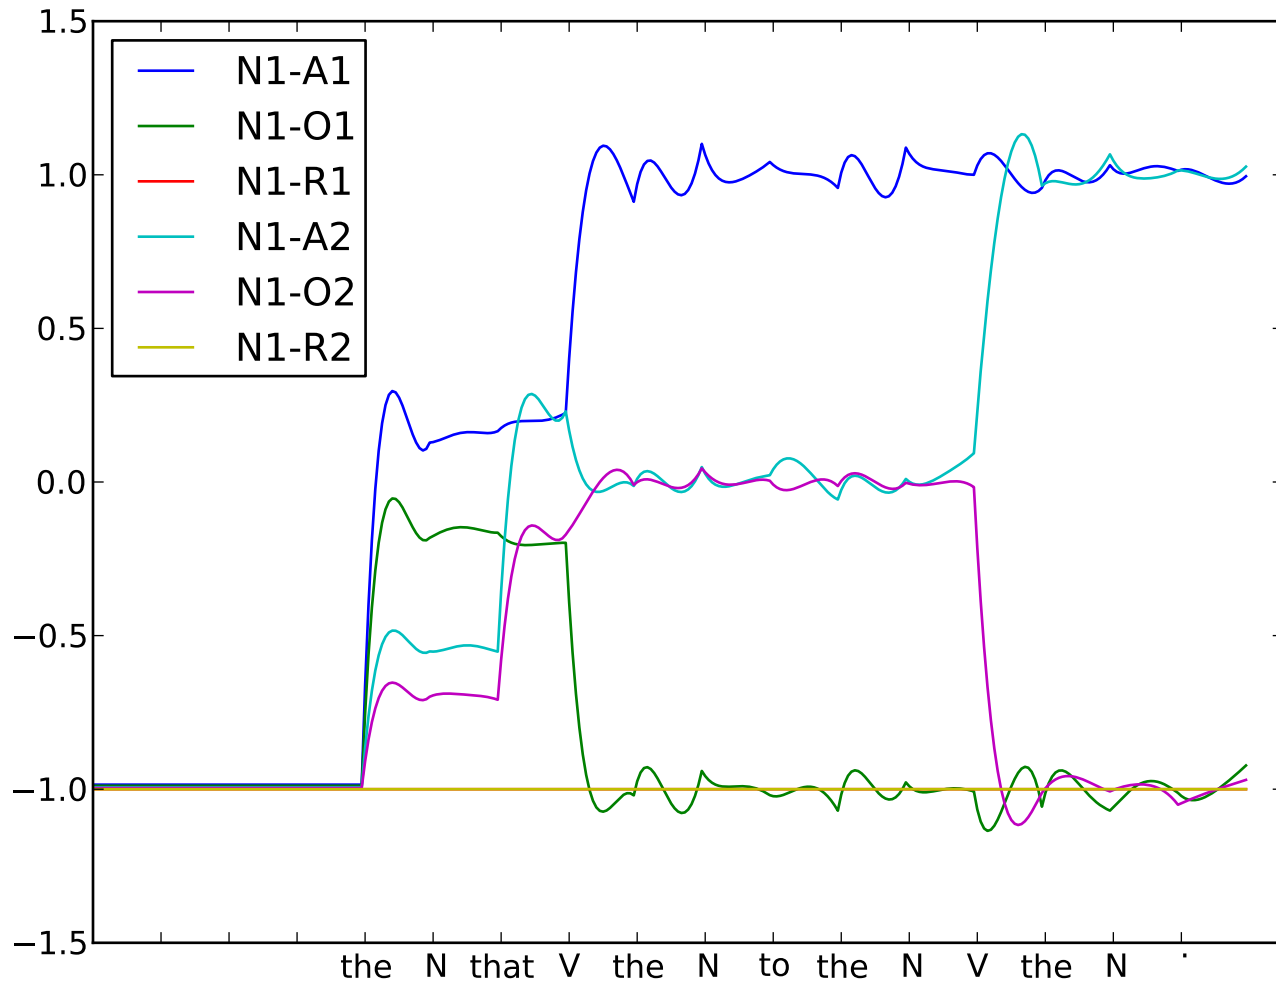

Sentence 34: 'the N that V the N to the N V the N .'

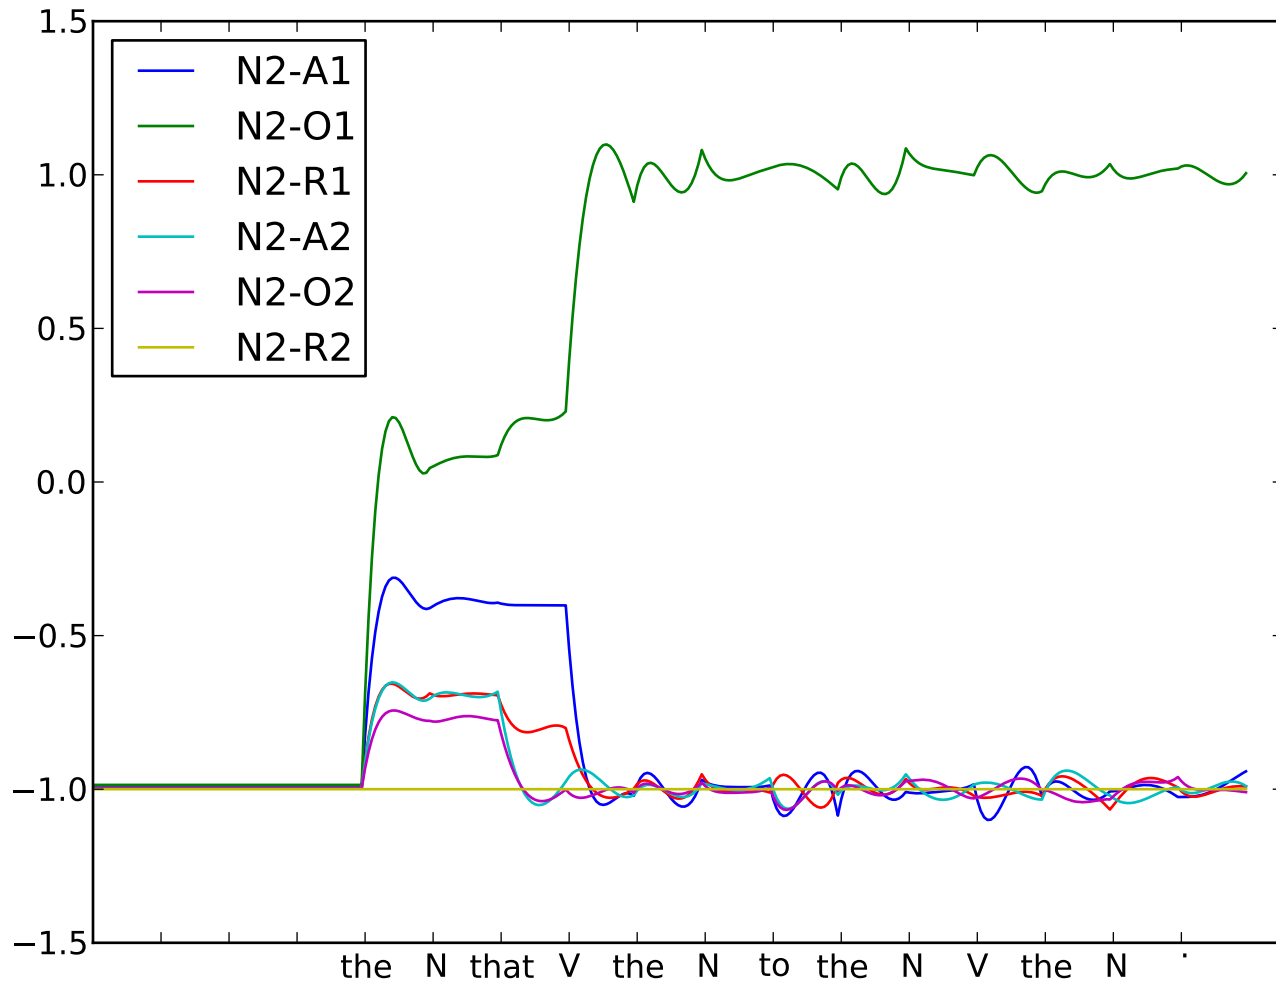

Sentence 34: 'the N that V the N to the N V the N .'

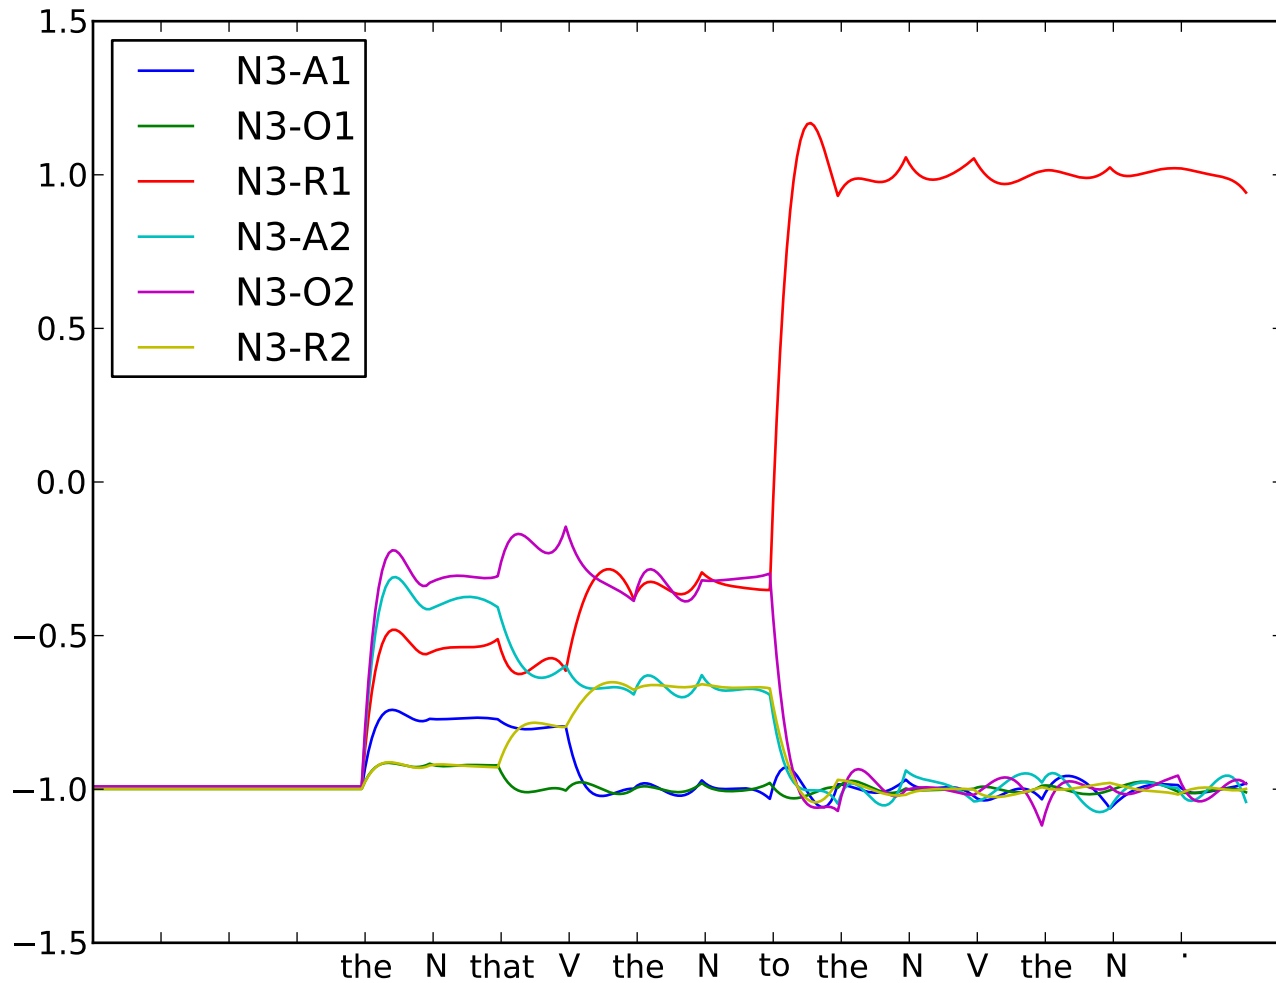

Sentence 34: 'the N that V the N to the N V the N .'

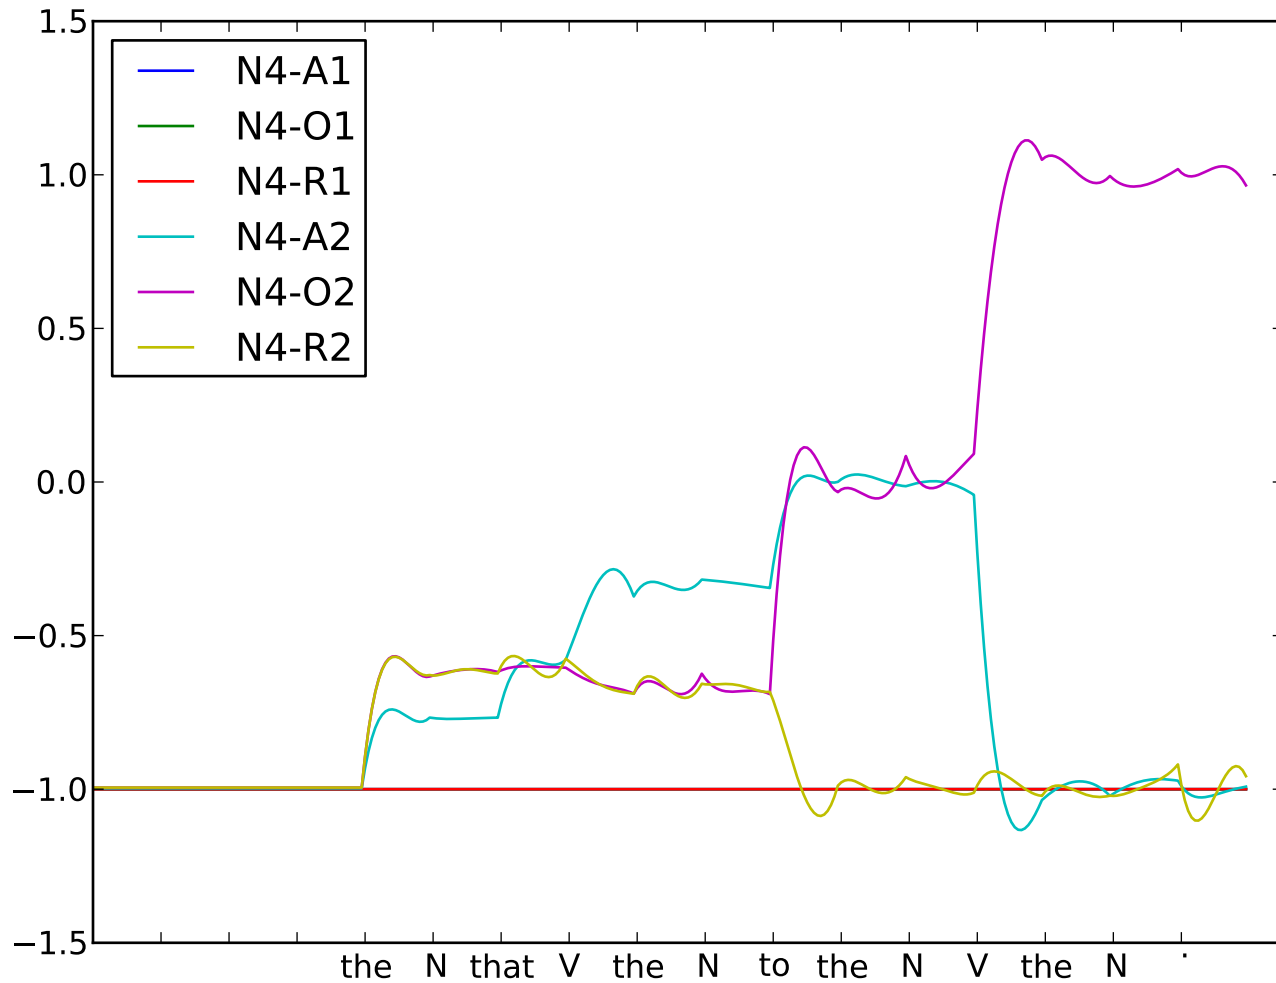



Sentence 35: 'the N was V by the N that V the N to the N .'

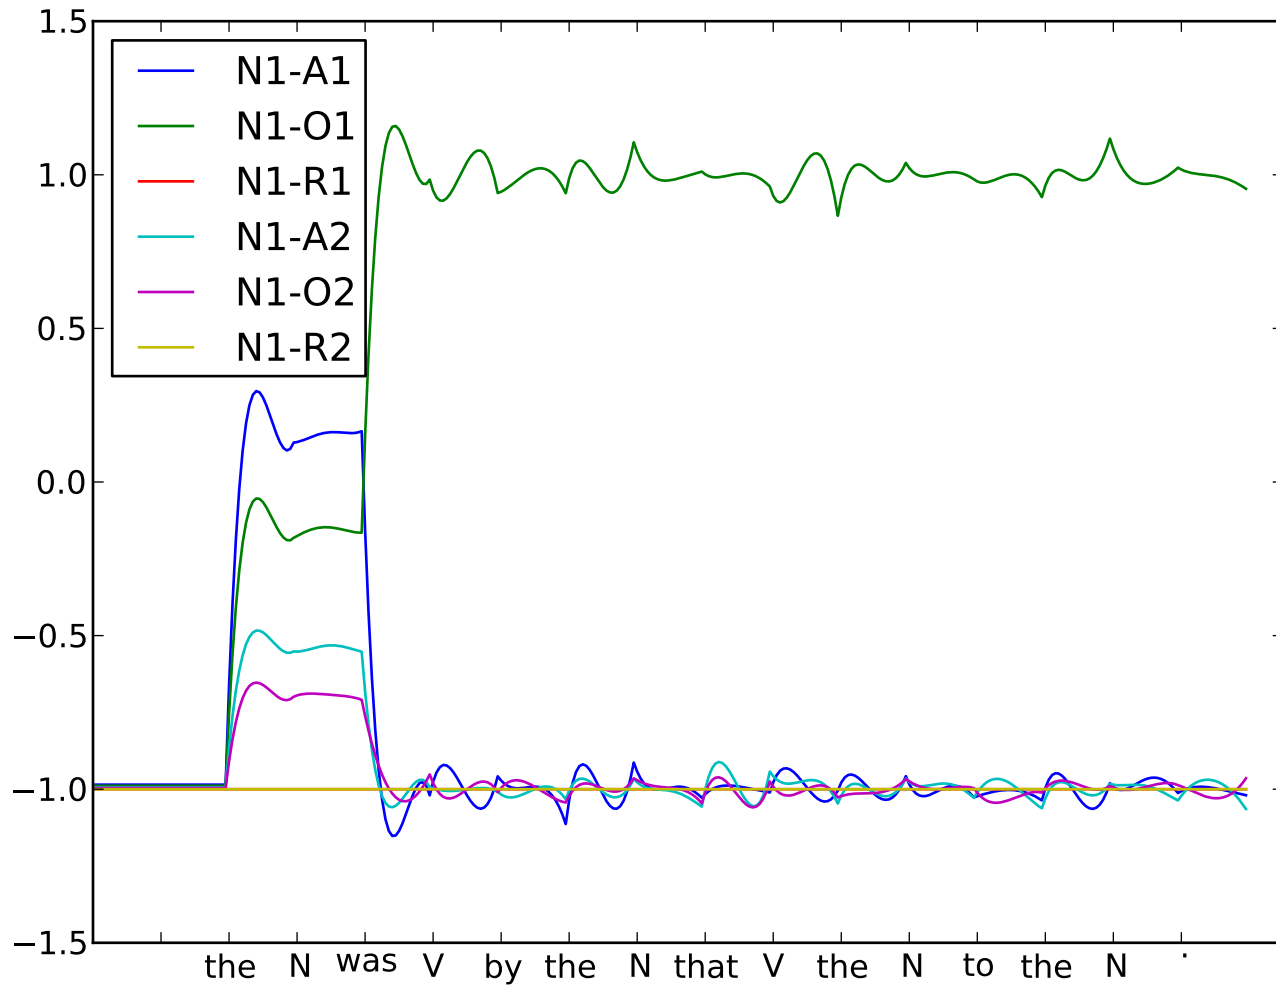

Sentence 35: 'the N was V by the N that V the N to the N .'

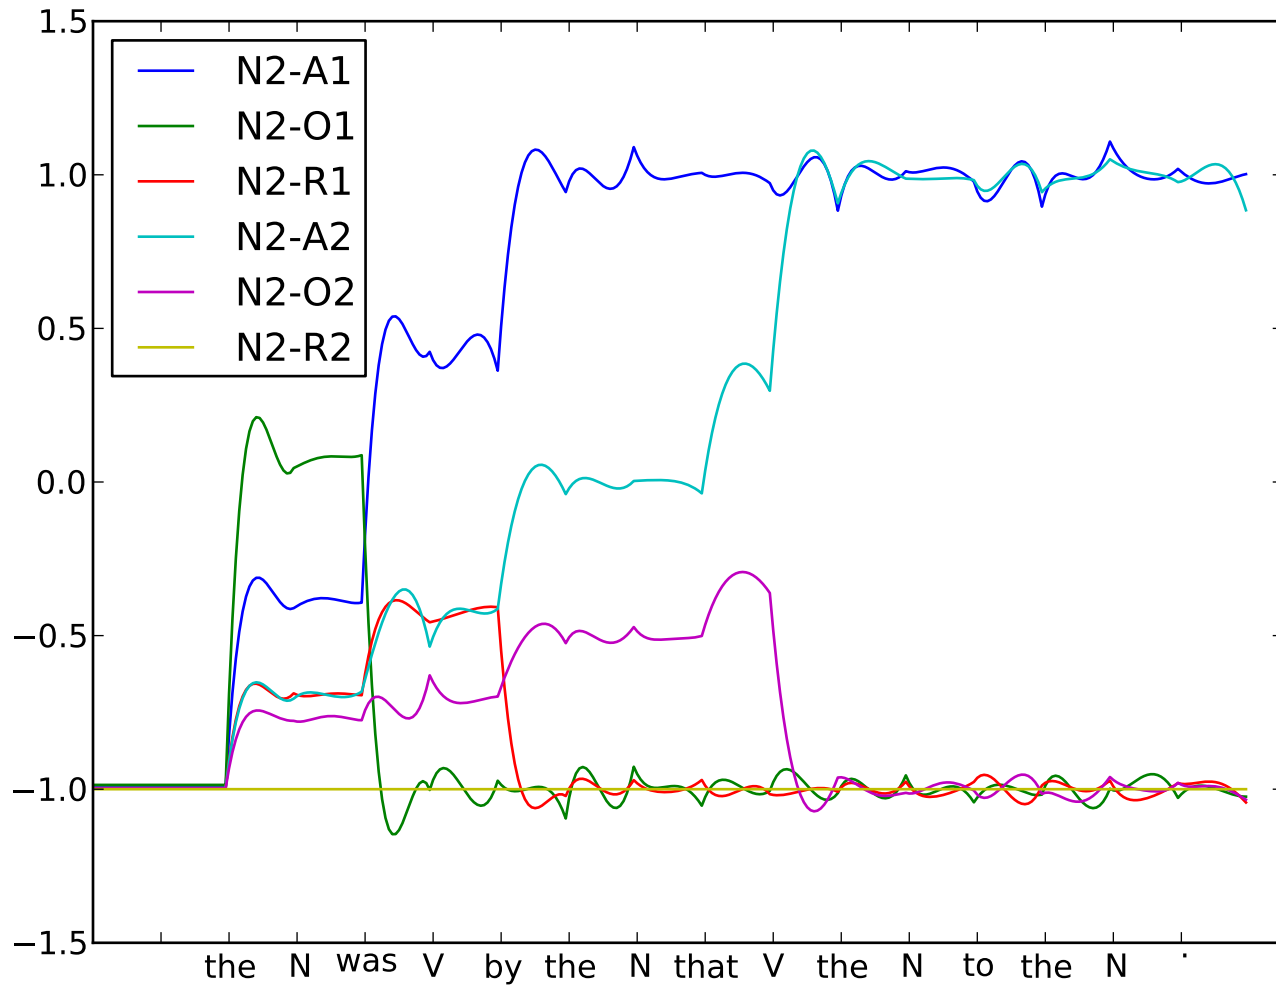

Sentence 35: 'the N was V by the N that V the N to the N .'

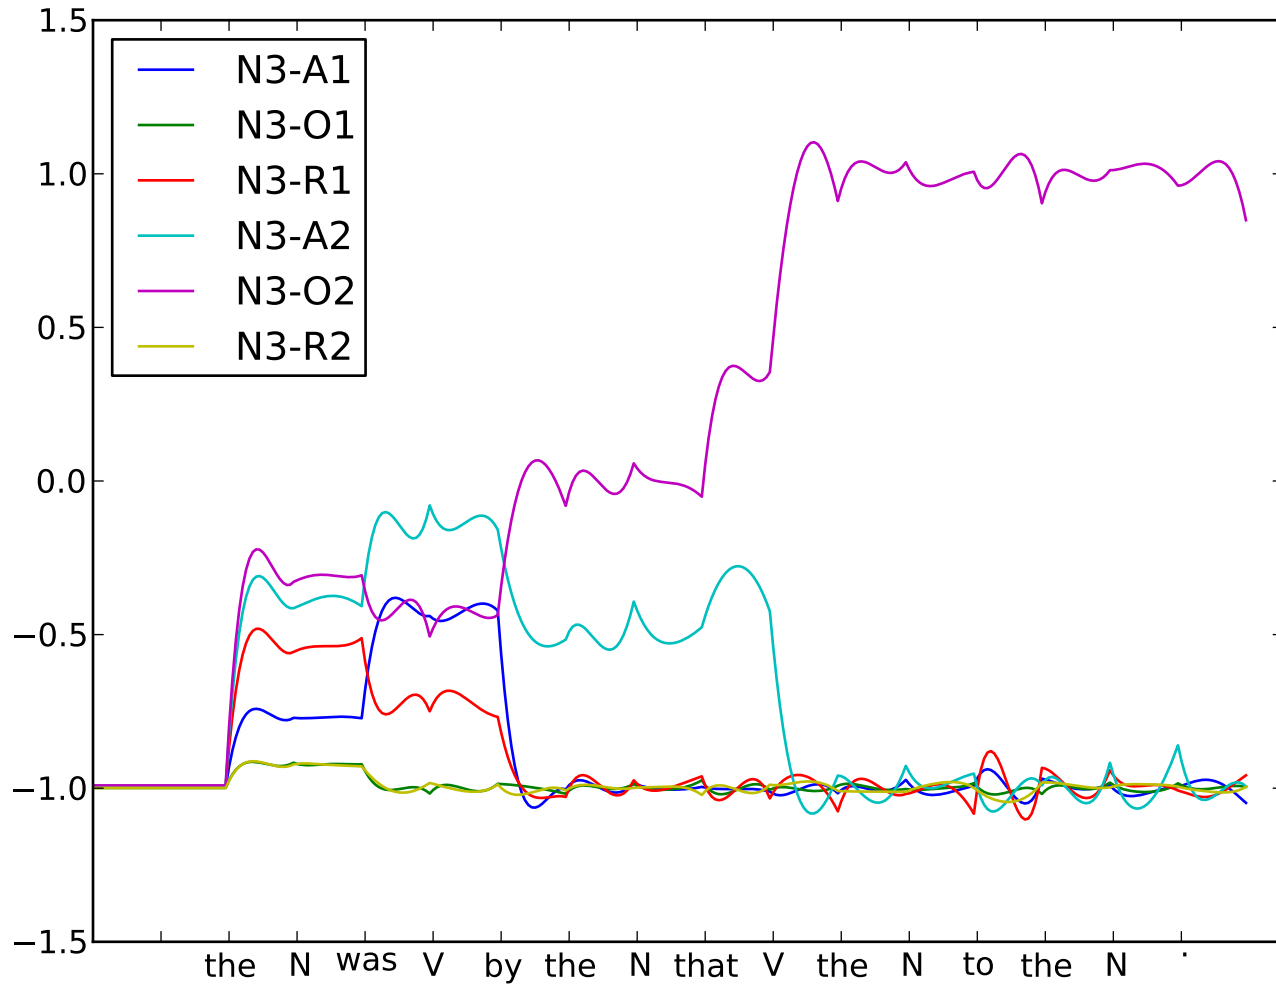

Sentence 35: 'the N was V by the N that V the N to the N .'

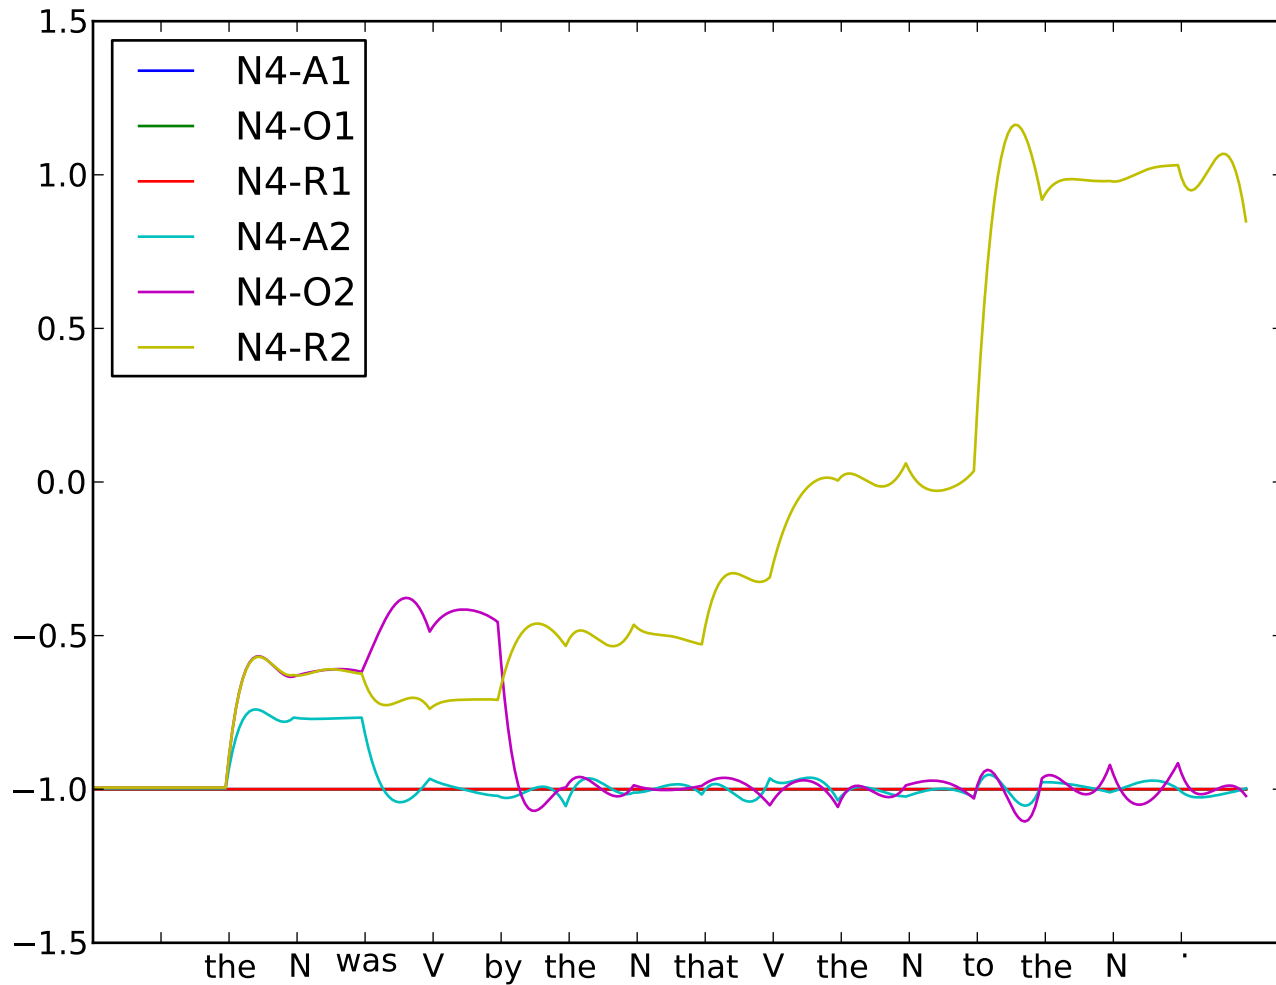



Sentence 36: 'the N V the N that V the N to the N .'

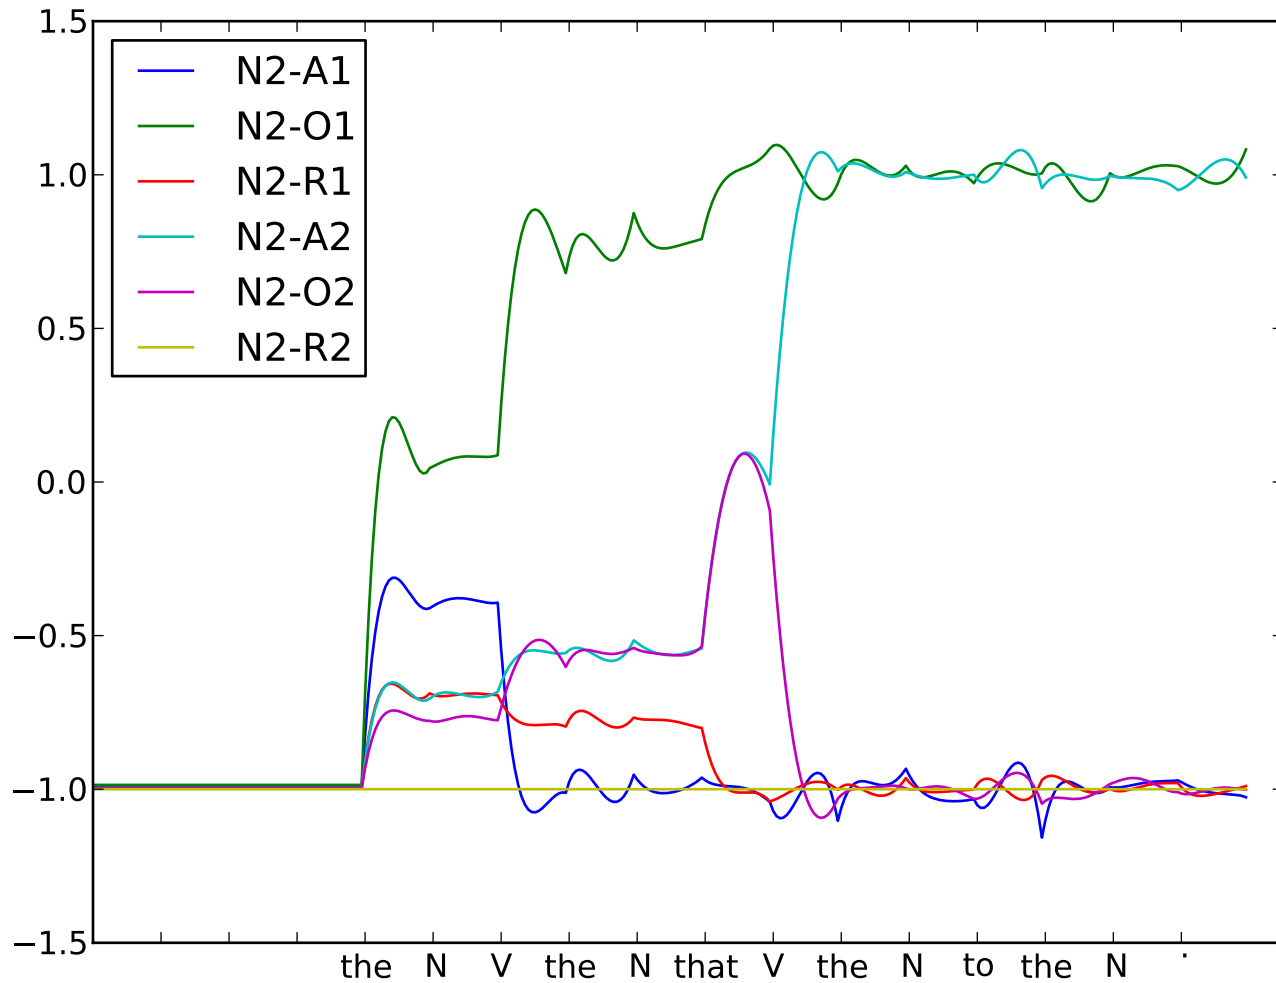

Sentence 36: 'the N V the N that V the N to the N .'

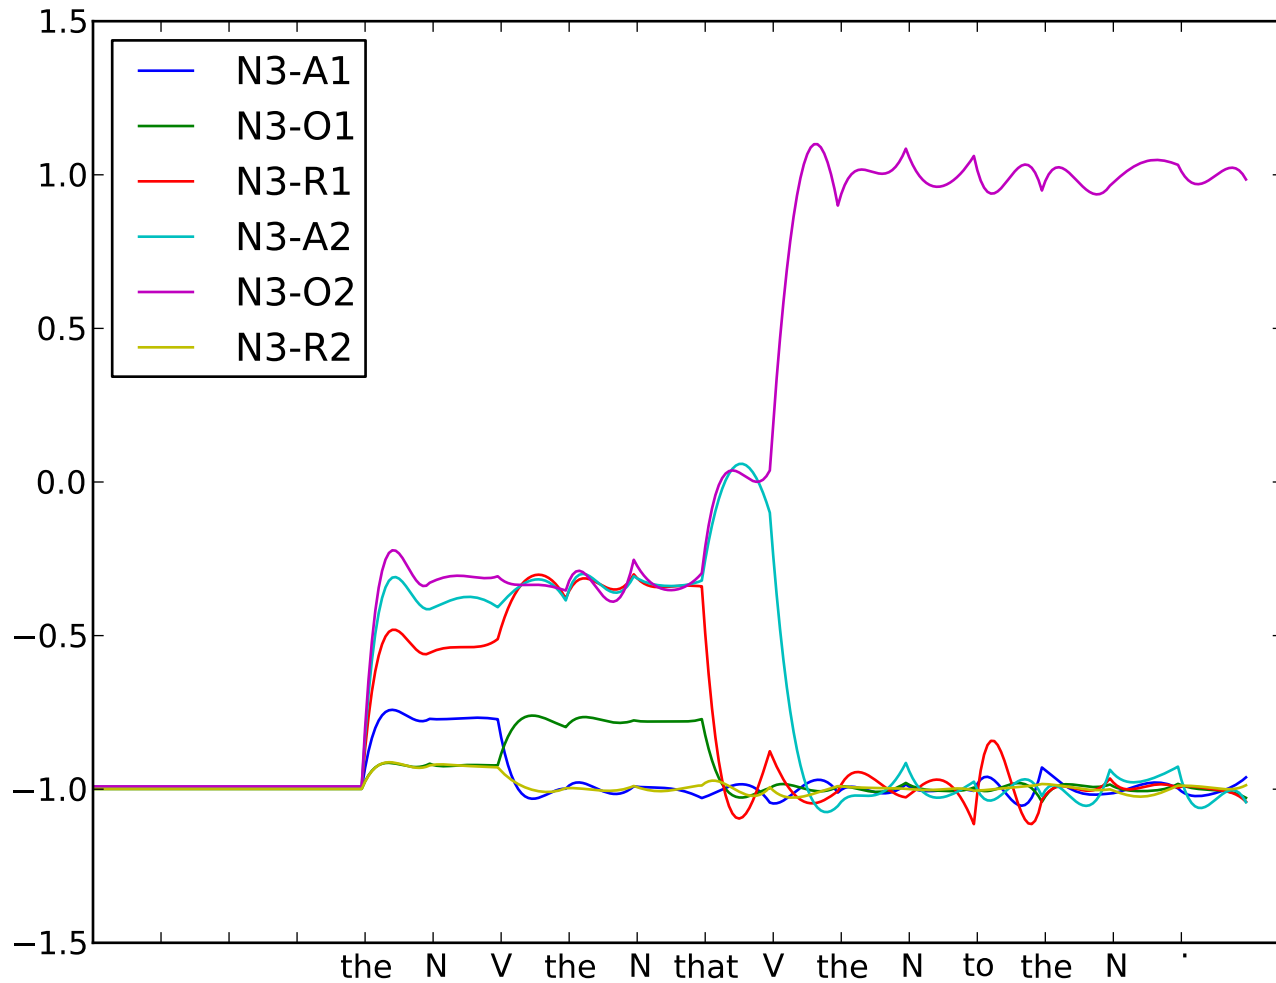

Sentence 36: 'the N V the N that V the N to the N .'

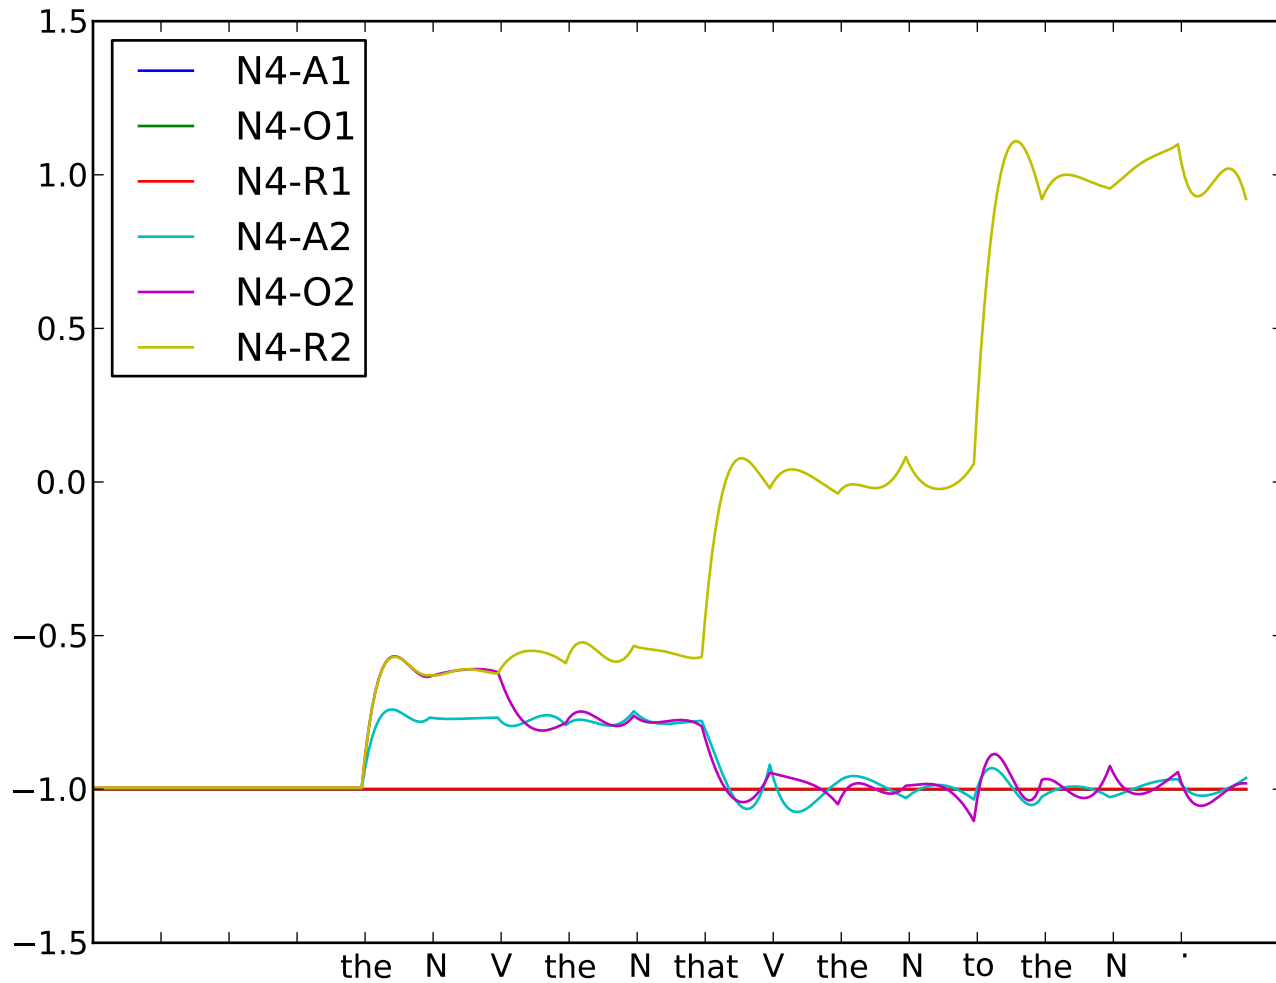



Sentence 37: 'the N that V the N to the N was V by the N .'

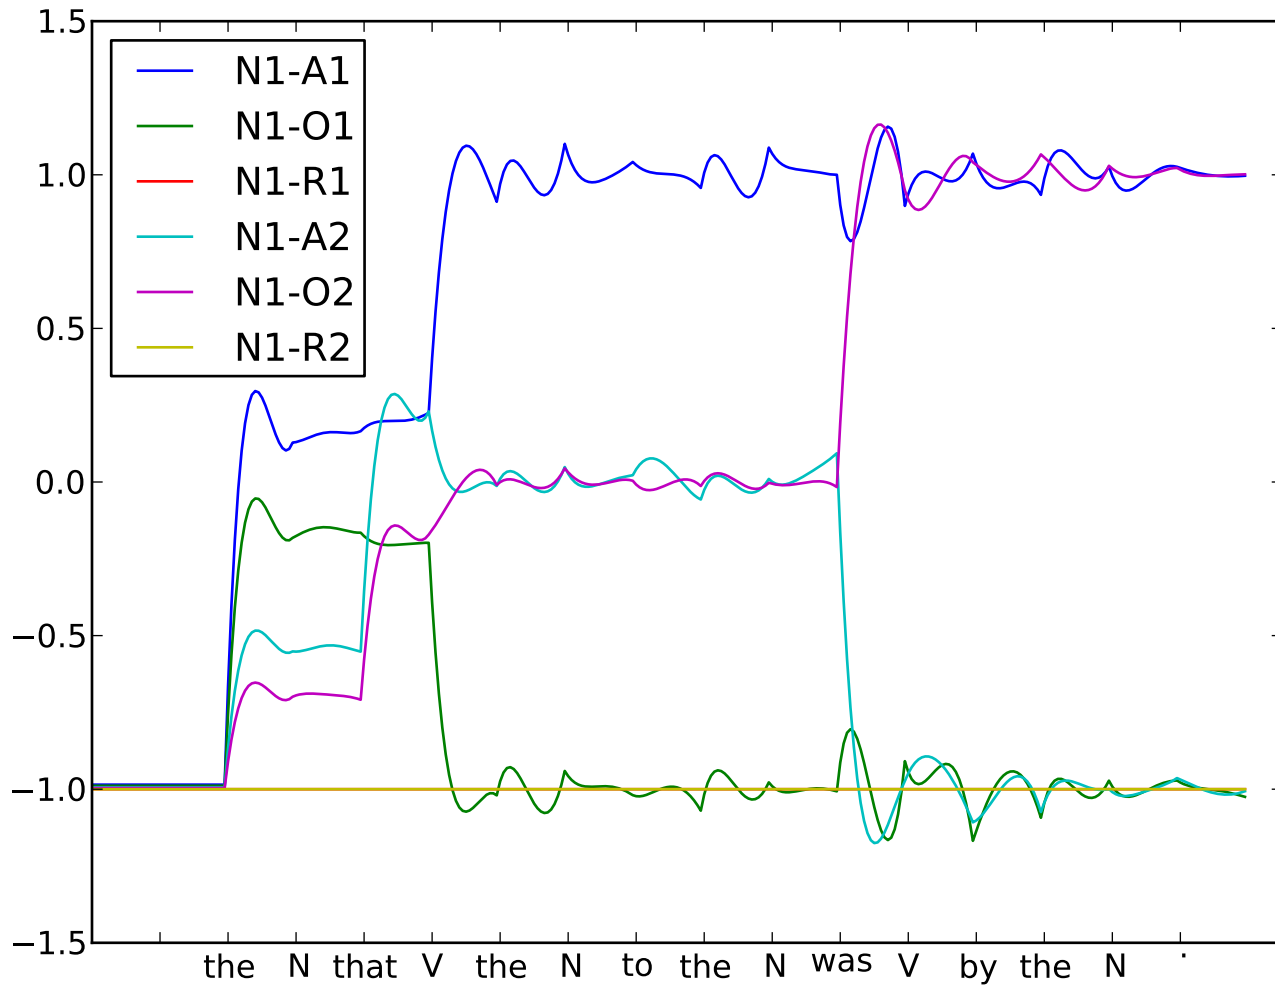

Sentence 37: 'the N that V the N to the N was V by the N .'

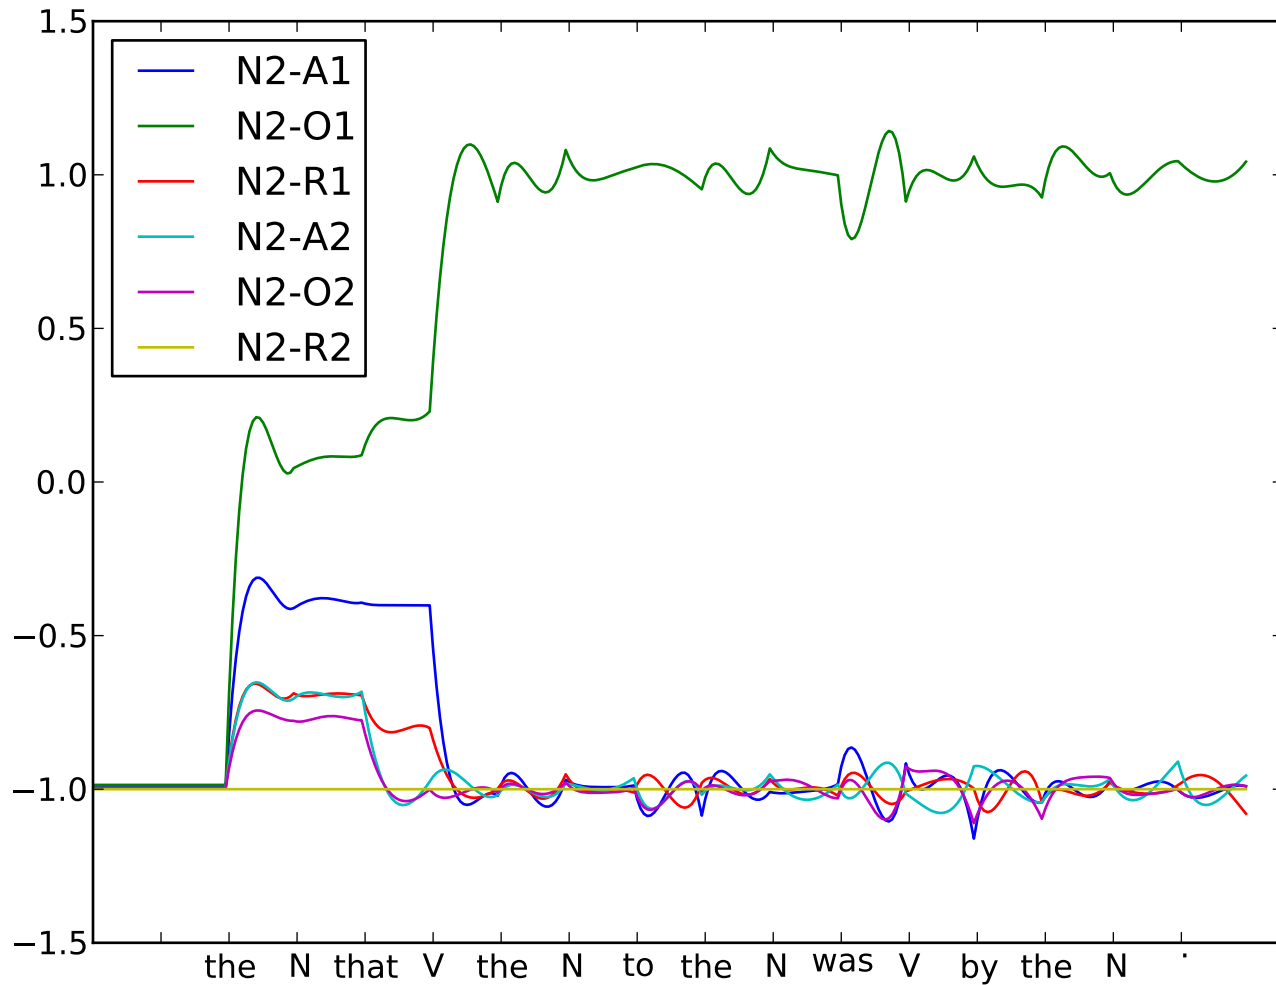

Sentence 37: 'the N that V the N to the N was V by the N .'

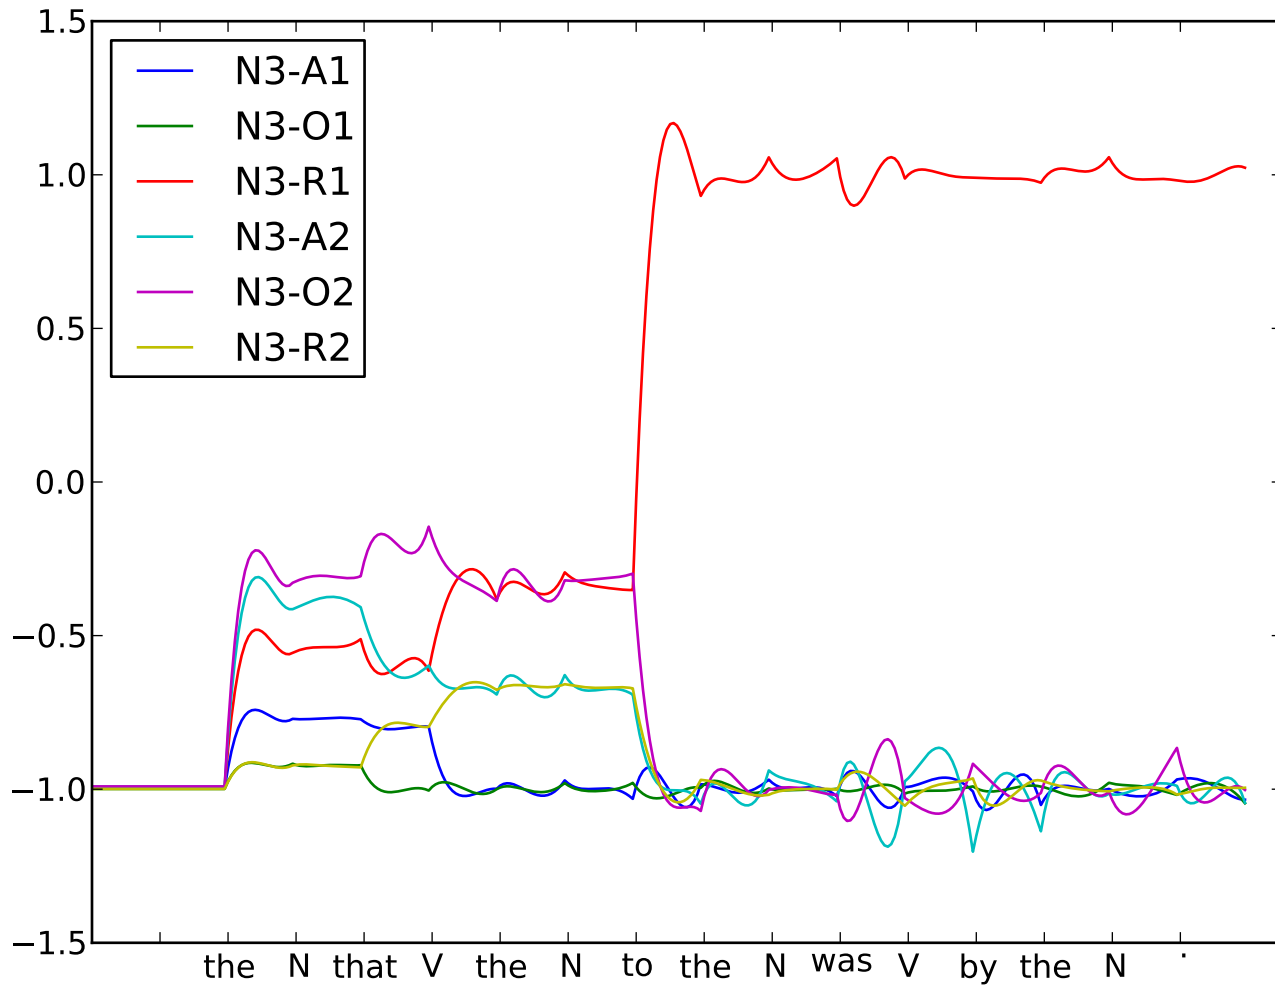

Sentence 37: 'the N that V the N to the N was V by the N . '

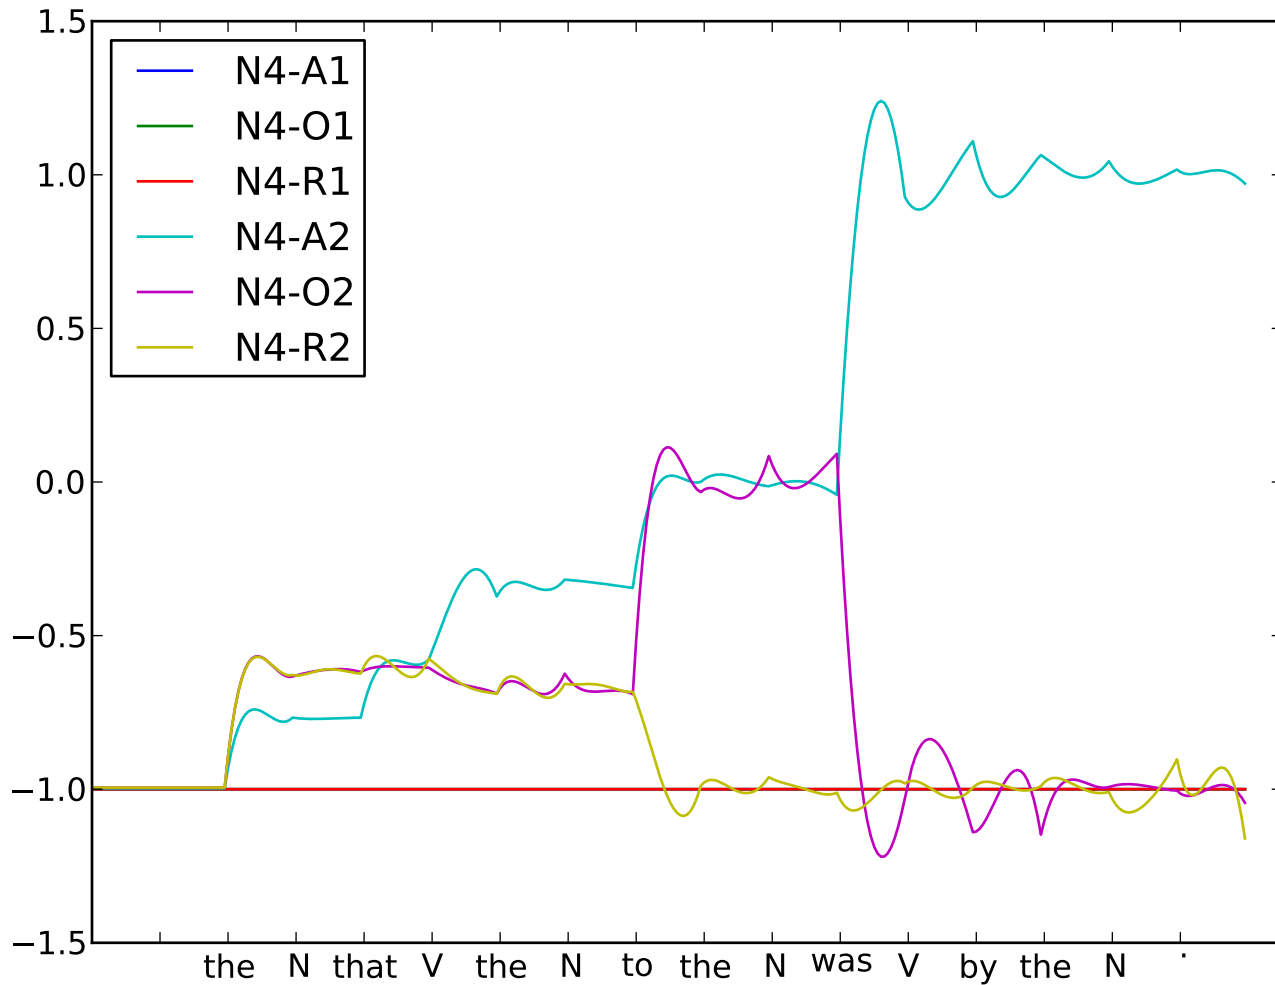

Sentence 38: 'the N that was V to the N by the N V the N .'

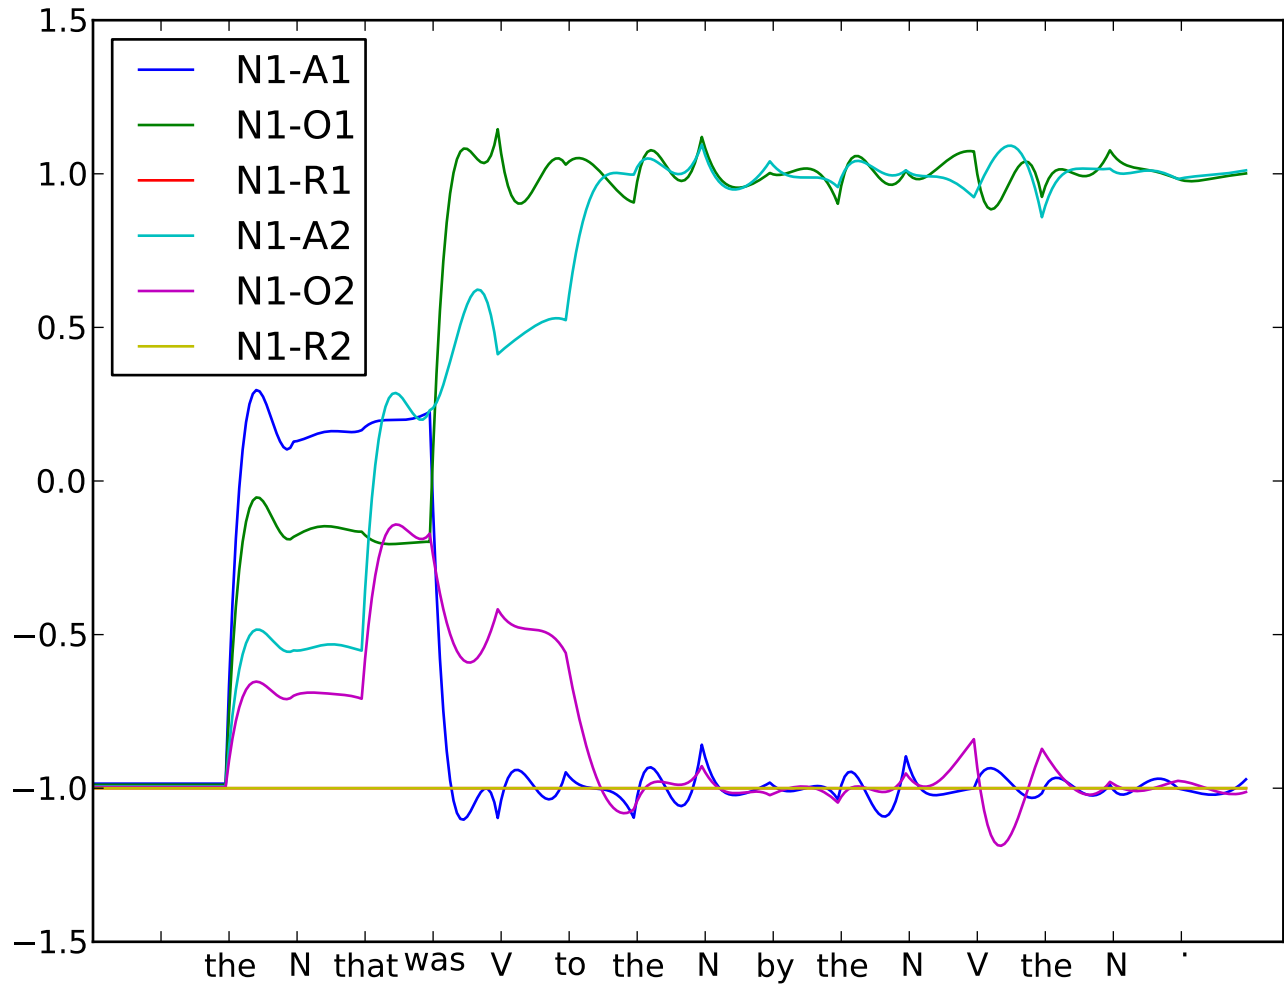

Sentence 38: 'the N that was V to the N by the N V the N .'

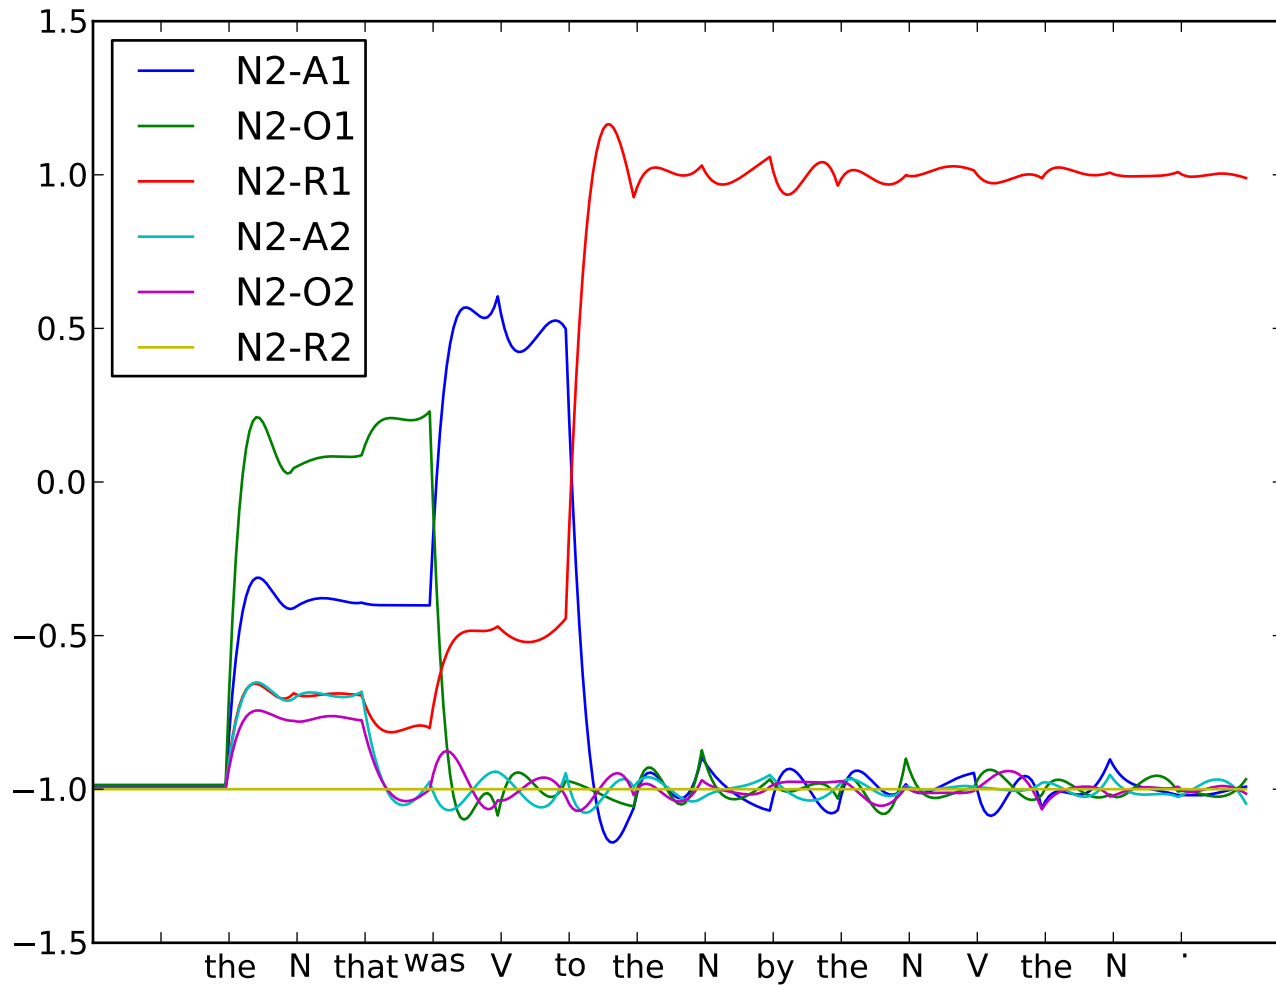

Sentence 38: 'the N that was V to the N by the N V the N .'

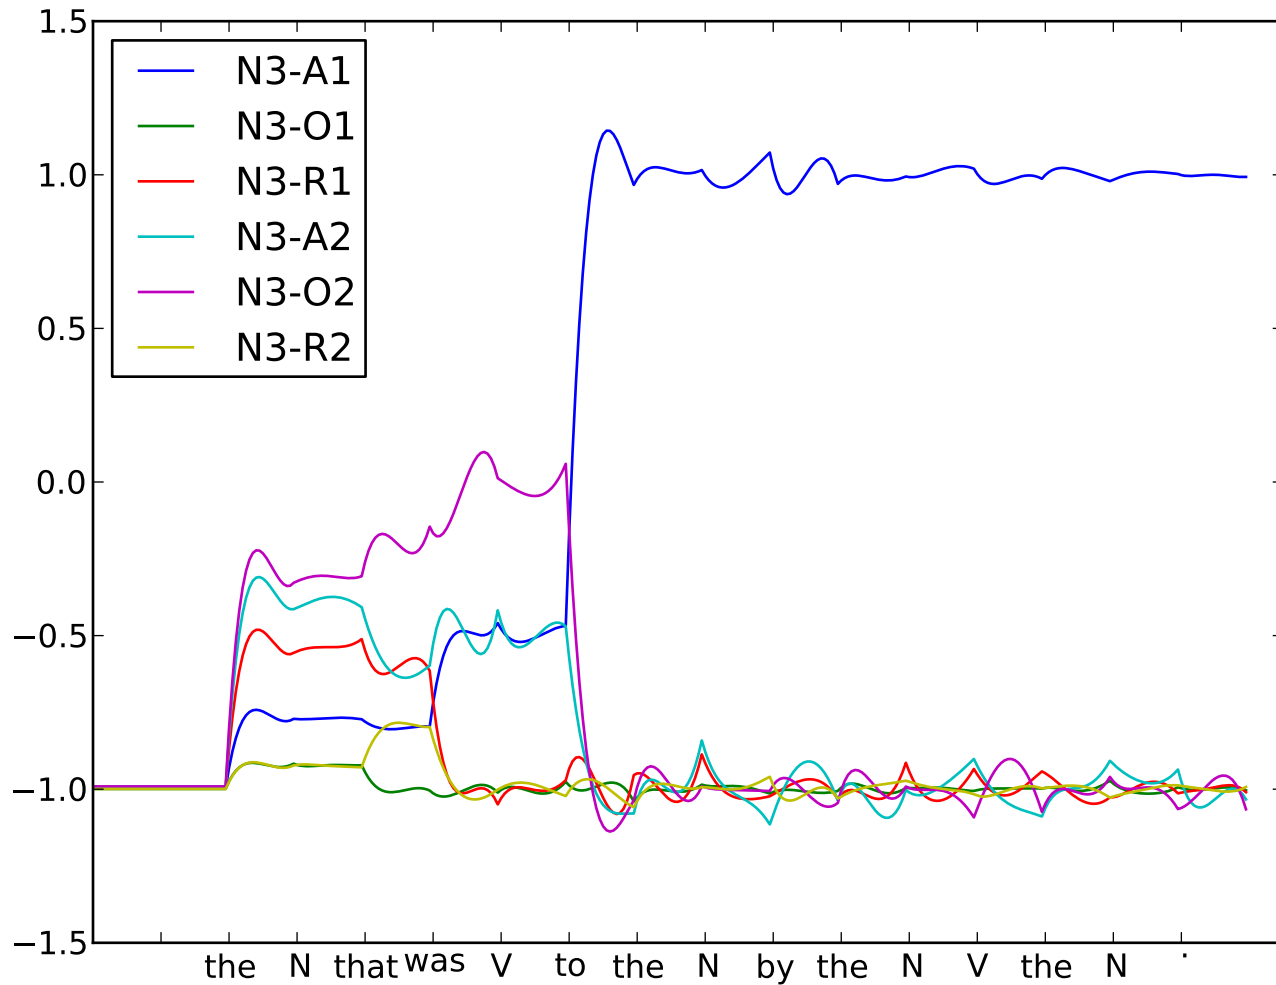

Sentence 38: 'the N that was V to the N by the N V the N .'

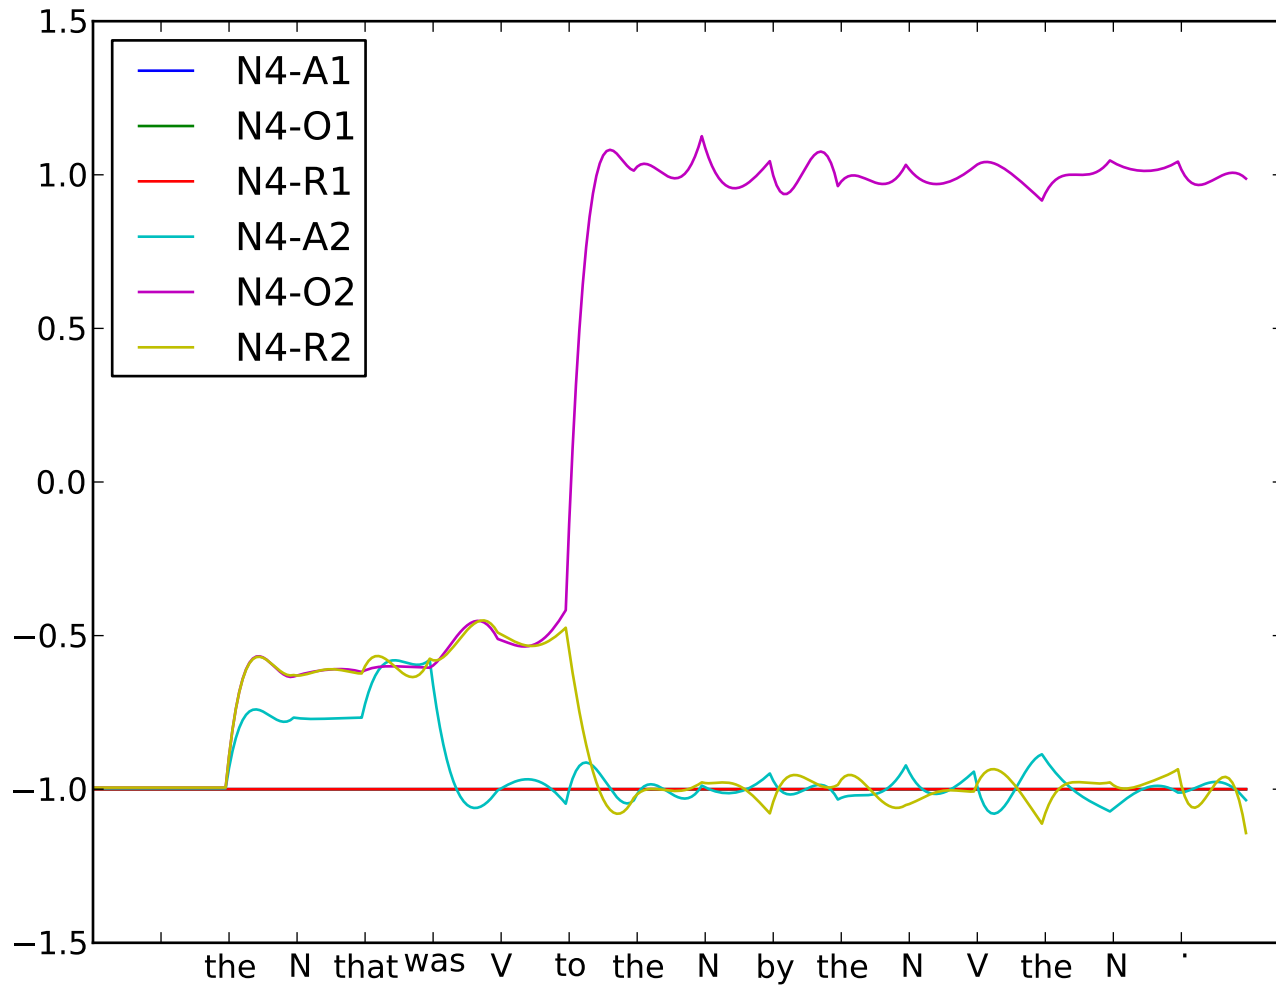



Sentence 39: 'the N V the N that was V by the N to the N .'

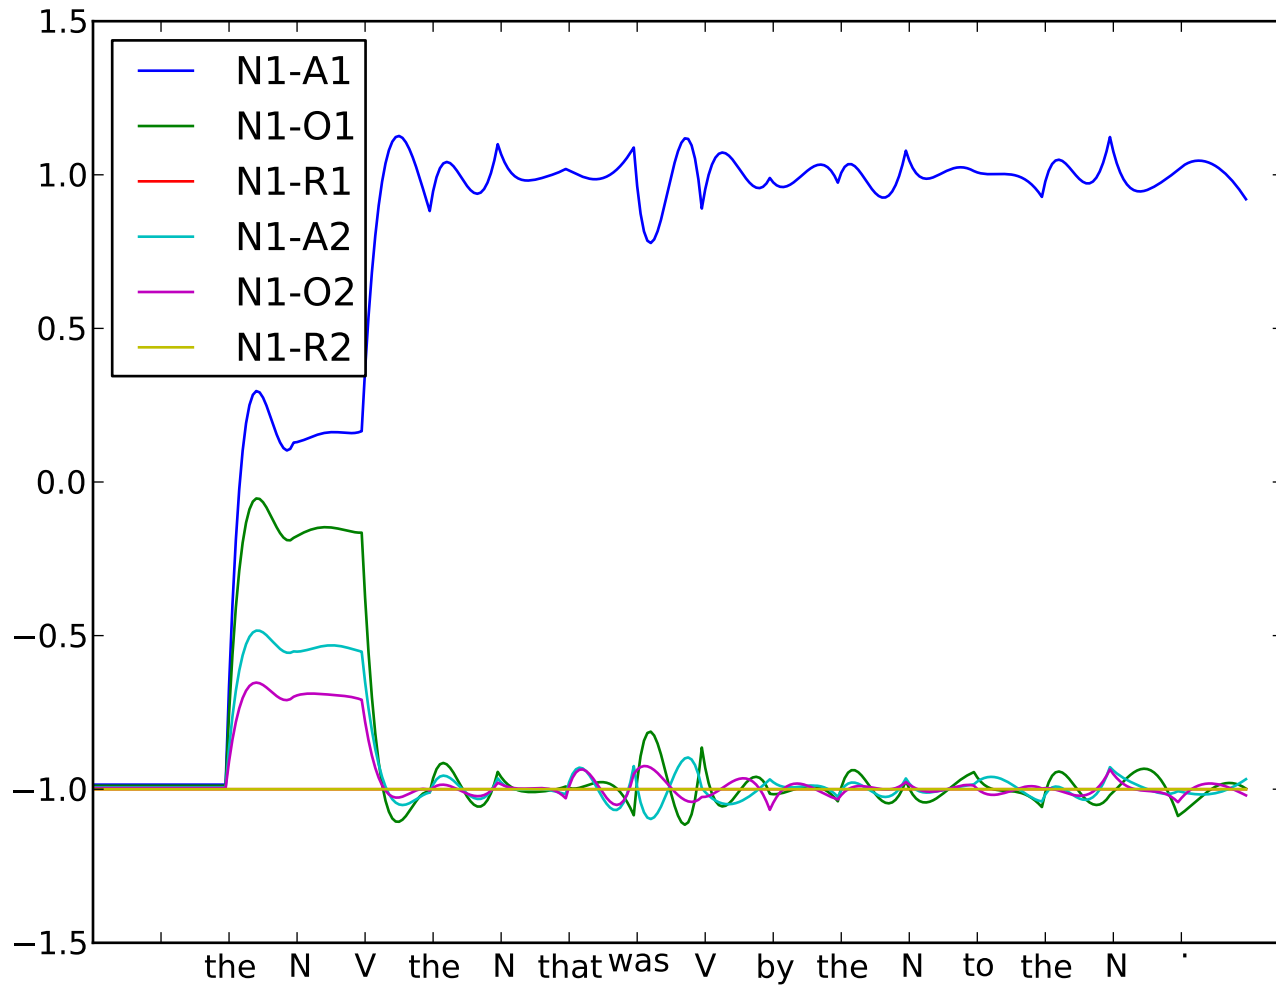

Sentence 39: 'the N V the N that was V by the N to the N .'

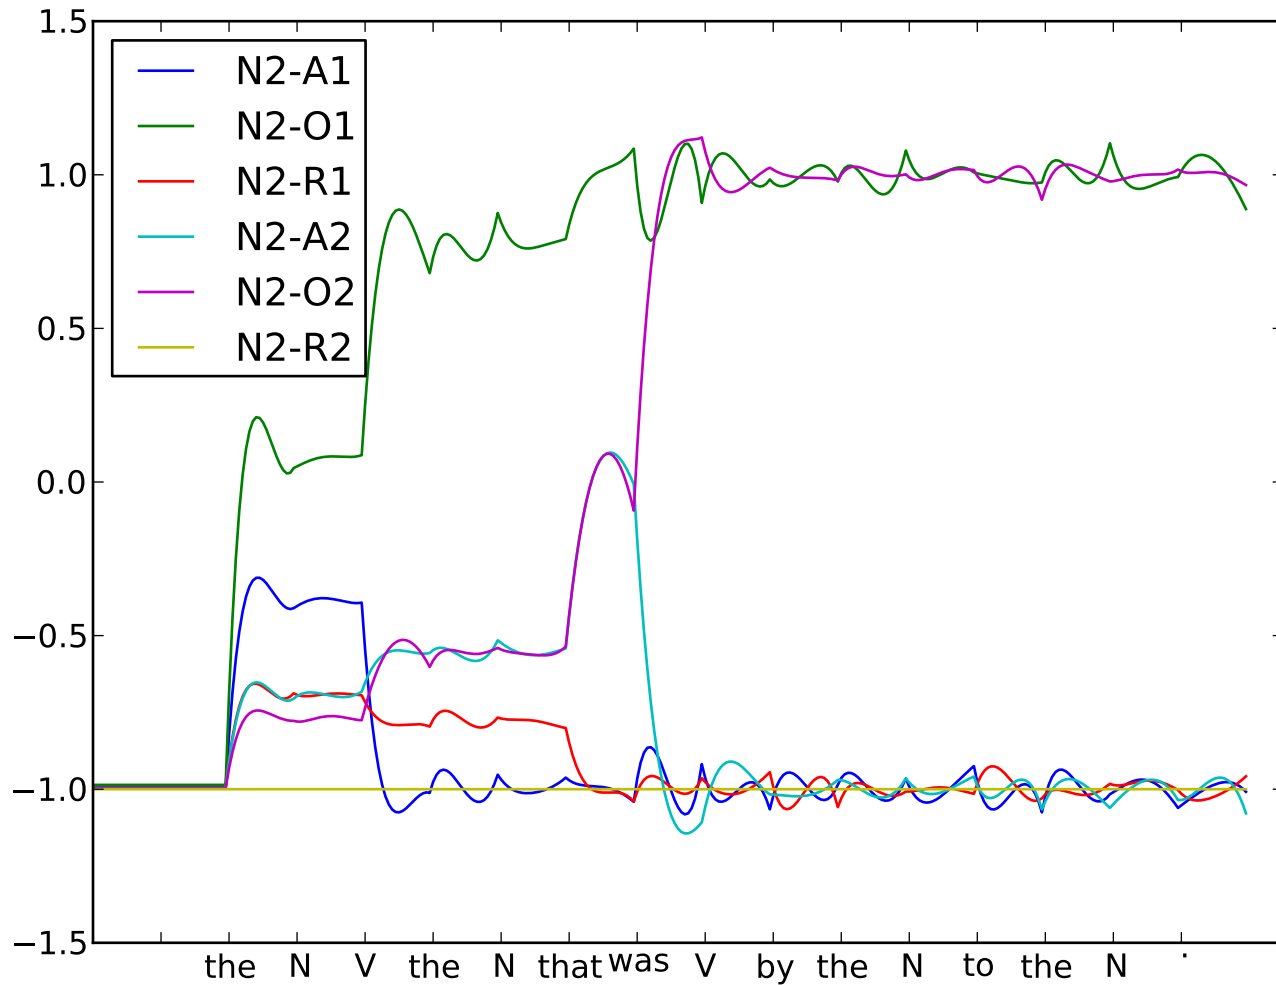

Sentence 39: 'the N V the N that was V by the N to the N .'

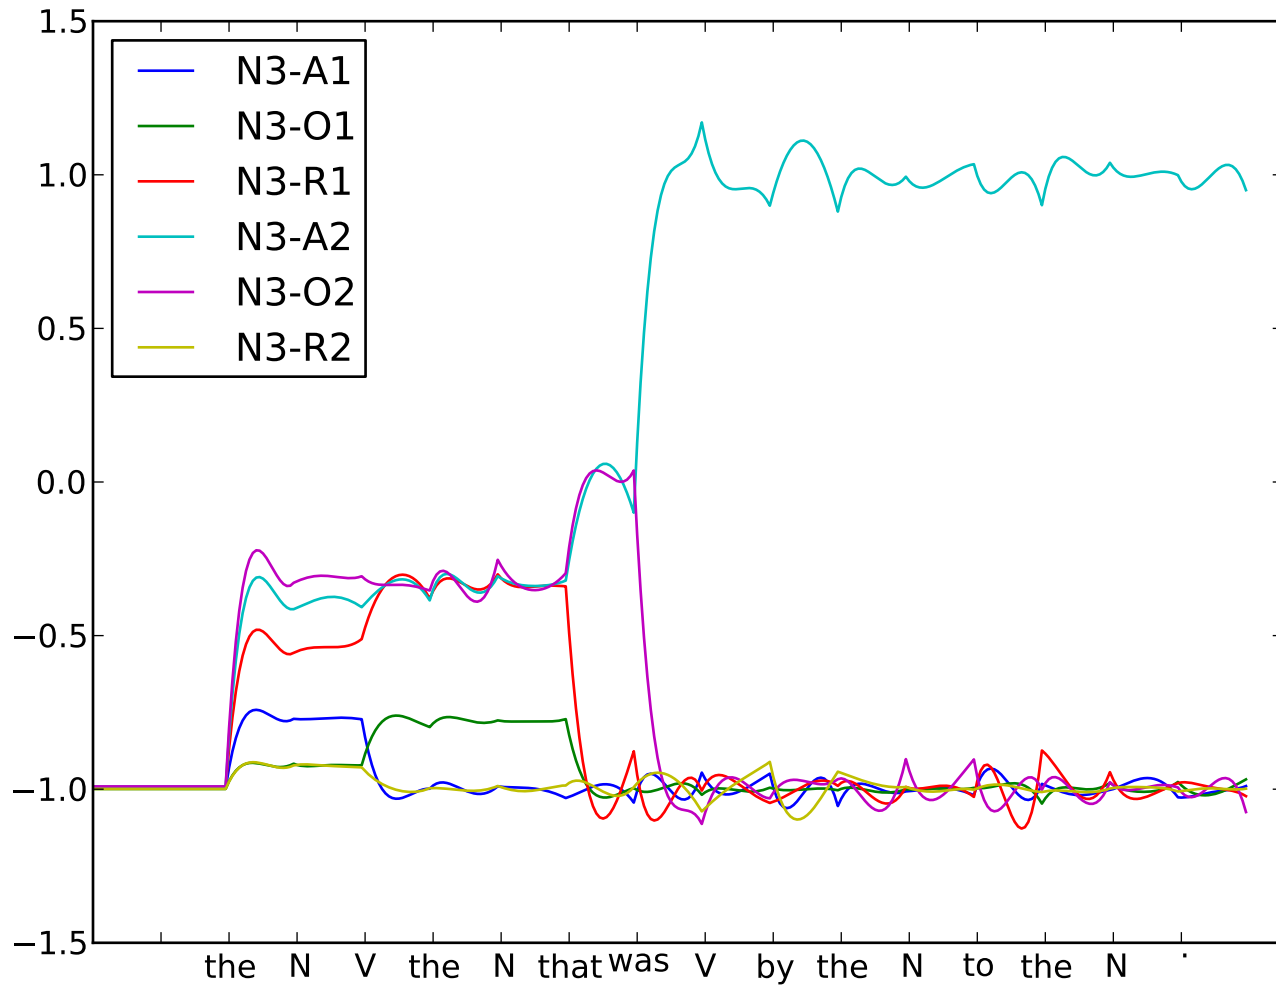

Sentence 39: 'the N V the N that was V by the N to the N .'

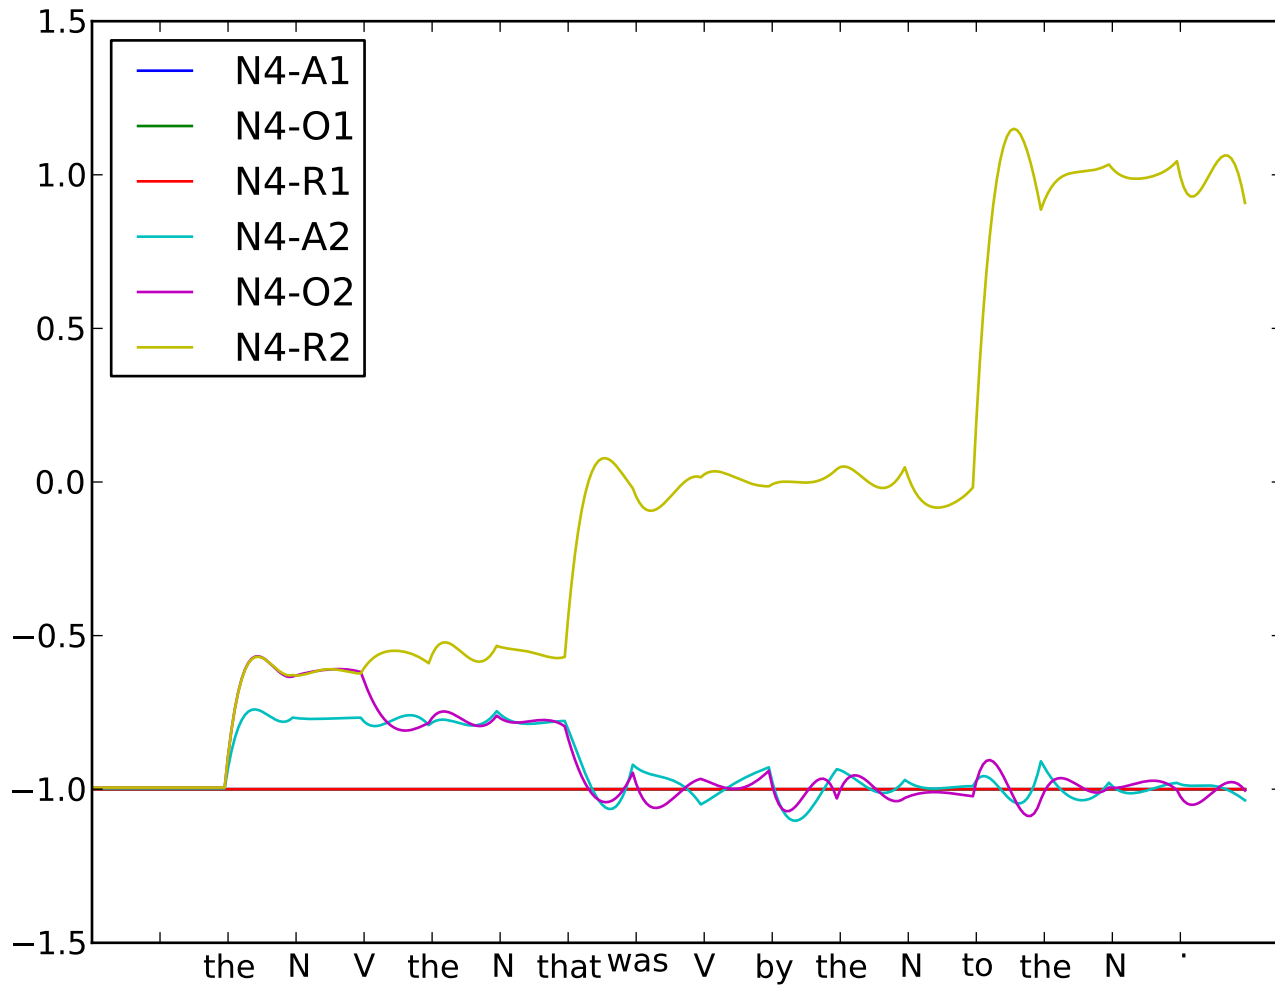

Sentence 40: 'the N that V the N V the N to the N .'

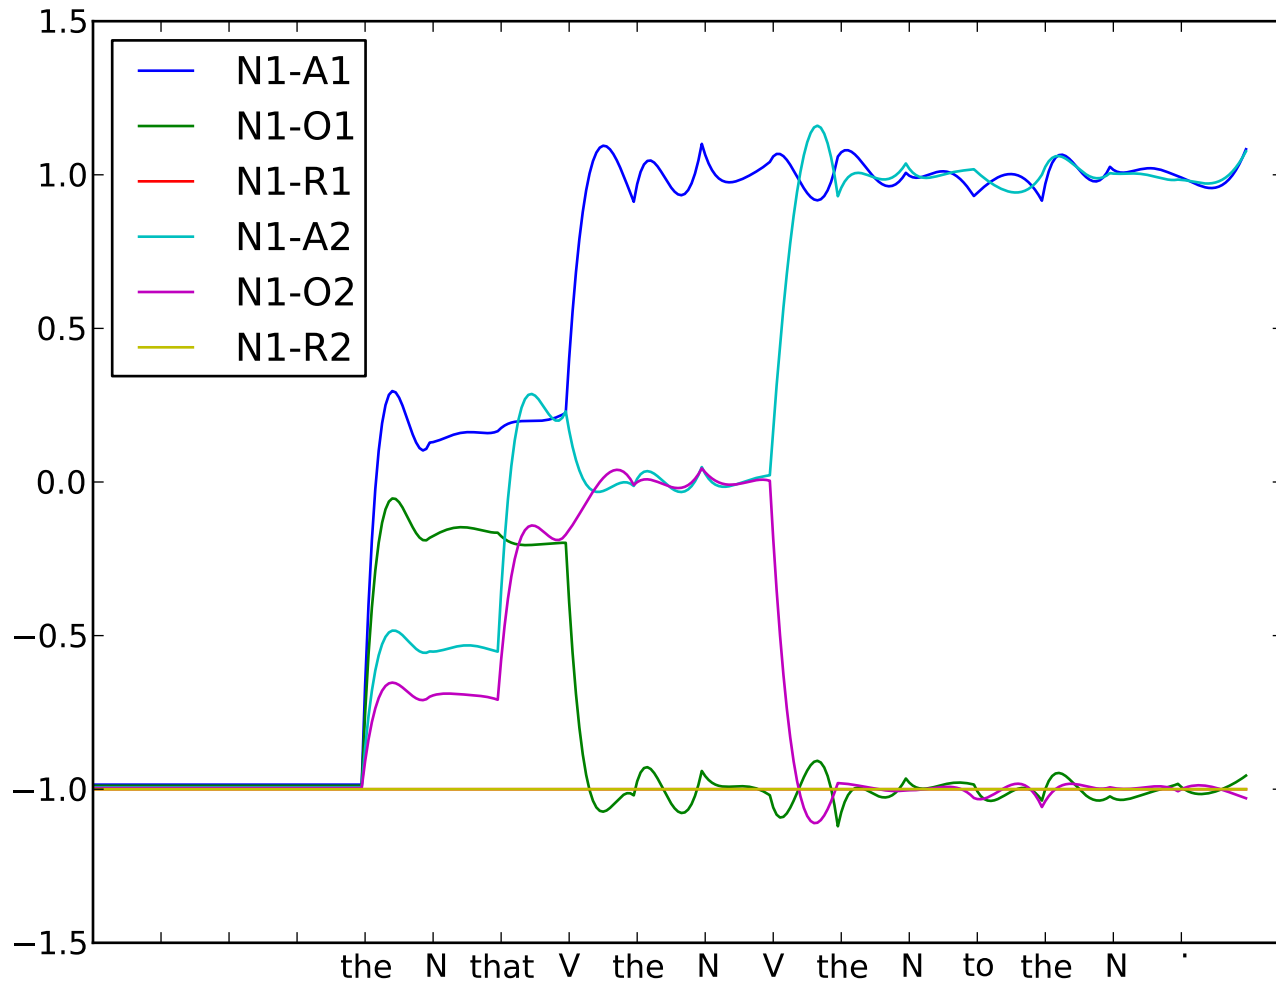

Sentence 40: 'the N that V the N V the N to the N .'

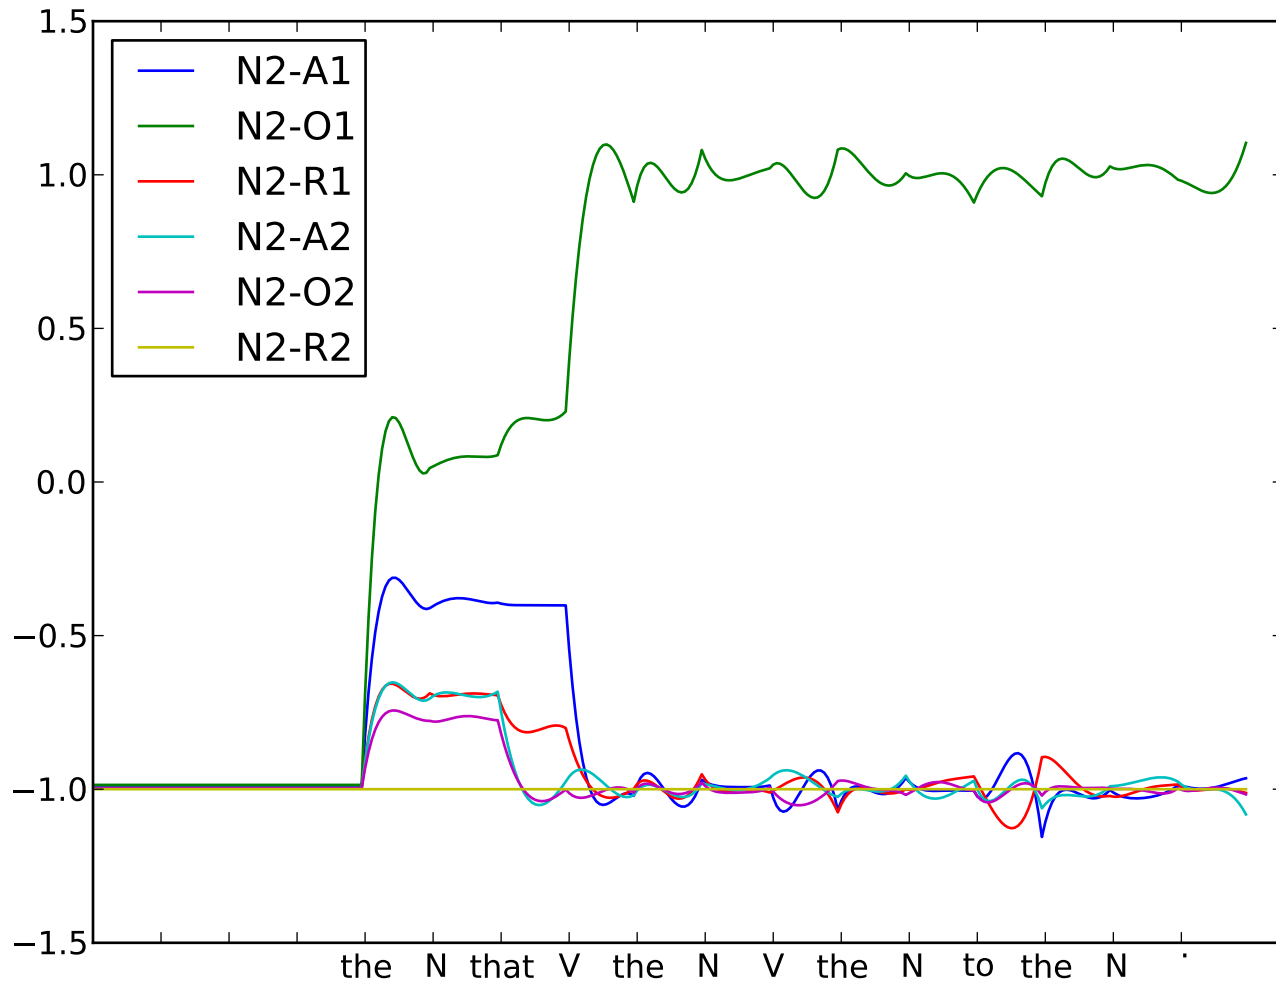

Sentence 40: 'the N that V the N V the N to the N .'

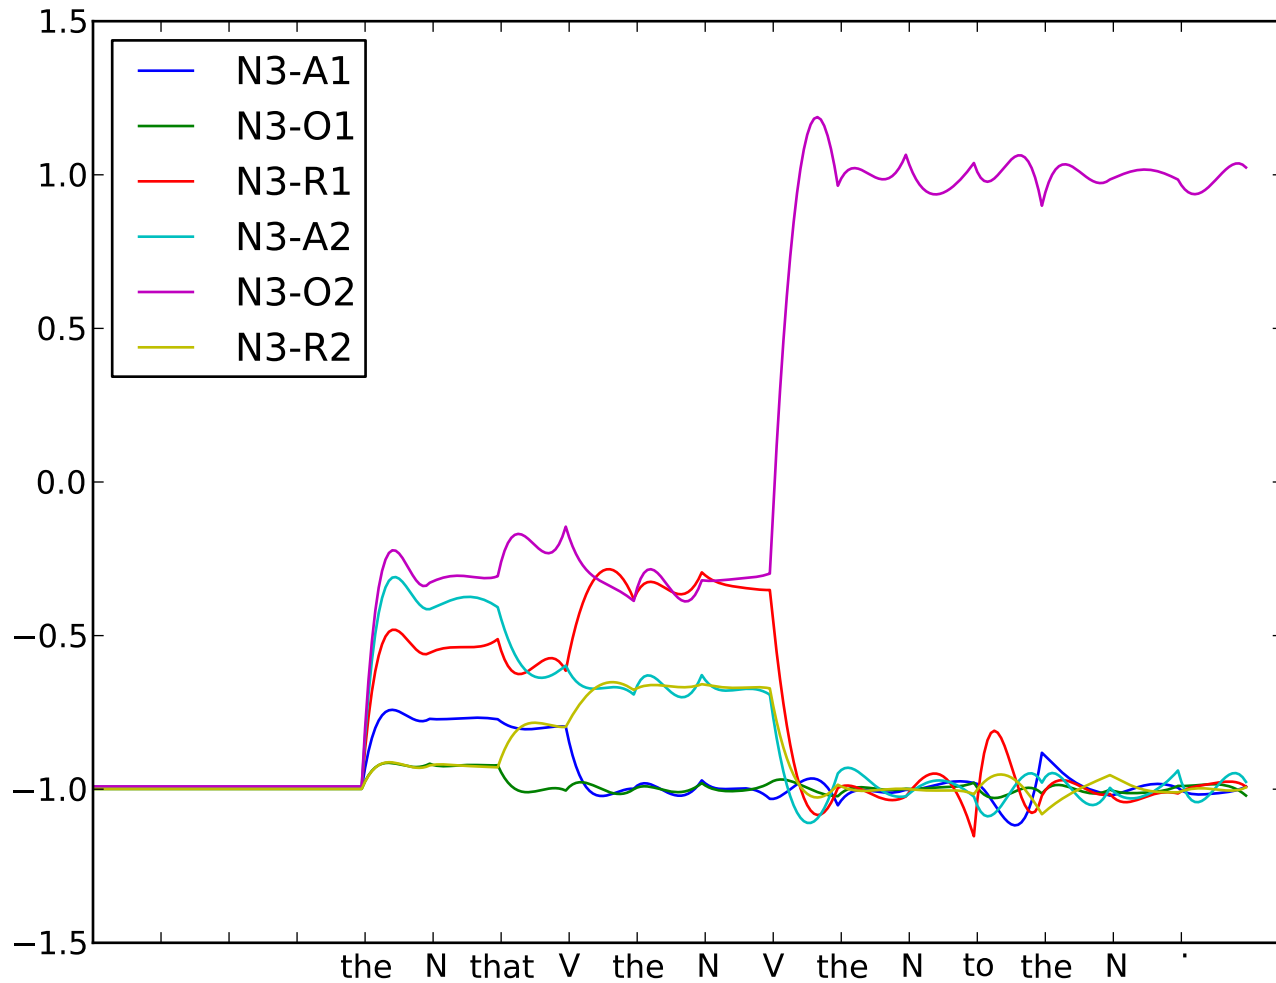

Sentence 40: 'the N that V the N V the N to the N .'

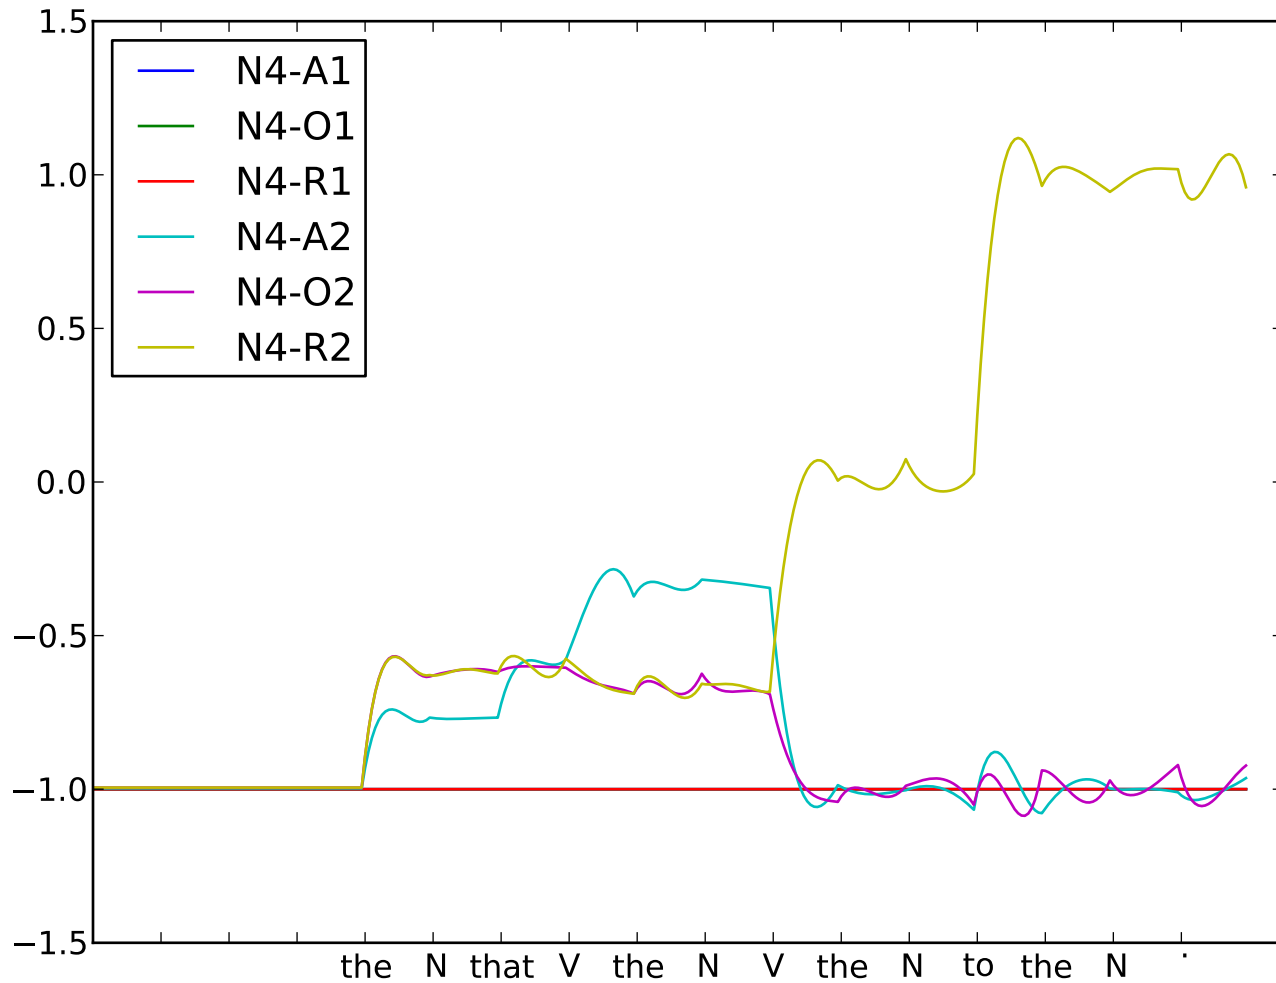

Supplement: pone.0052946.s005.pdf [file pone.0052946.s005.pdf]
